# Supplementary material for: A diastereoselective Mannich-type reaction of α-fluorinated carboxylate esters: synthesis of β-amino acids containing α-quaternary fluorinated carbon centers
Source: Royal Society of Chemistry journal article supplement (doi:10.1039/c6ob01084a), 2016-01-01

# Diastereoselective Mannich-Type Reaction of $\alpha$ -Fluorinated Carboxylate Esters: Synthesis of $\beta$ -Amino Acids Containing $\alpha$ -Quaternary Fluorinated Carbon Centers

Xiang Li, Ya Li,\* Huaqi Shang

*Department of Chemistry and Chemical Engineering, Shanghai University of Engineering  
Science, 333 Longteng Road, Shanghai, 201620*

*E-mail: [ya.li@sues.edu.cn](mailto:ya.li@sues.edu.cn)*

## Contents

|                                                                    |     |
|--------------------------------------------------------------------|-----|
| General remarks.....                                               | S2  |
| Synthesis of fluorocarbon nucleophiles.....                        | S3  |
| Synthesis and characterization of all new compounds.....           | S4  |
| X-ray crystal structure of <b>5k</b> .....                         | S18 |
| X-ray crystal structure of <b>7a</b> .....                         | S19 |
| Determination of <i>d.r.</i> according to $^{19}\text{F}$ NMR..... | S20 |
| NMR Spectra for all new products.....                              | S47 |

## General Remarks

Unless otherwise mentioned, all commercial reagents and solvents were used directly as purchased. Compounds **1**, **4**, **6** and **3j** were prepared according to literature methods.<sup>[1-4]</sup> THF was distilled from sodium/benzophenone. TMEDA was dried with 4Å molecular sieves. Flash chromatography was performed on silica gel with petroleum ether/ethyl acetate as the eluent. Melting points were uncorrected. Optical rotations were measured with a sodium lamp. <sup>1</sup>H, <sup>13</sup>C and <sup>19</sup>F NMR spectra were recorded on a 400 MHz NMR spectrometer. High-resolution mass data were recorded on a high-resolution mass spectrometer in the ESI mode. Chemical shifts ( $\delta$ ) are reported in parts per million and referenced to the residual solvent peak, and *J* values are given in *hertz* (Hz). HRMS data were obtained on an ESI-FTMS mass spectrometer.

## Synthesis of $\alpha$ -fluorinated carboxylate esters

1) Typical synthetic route for the synthesis of  $\alpha$ -alkylated fluoroacetate **1**<sup>[1]</sup>

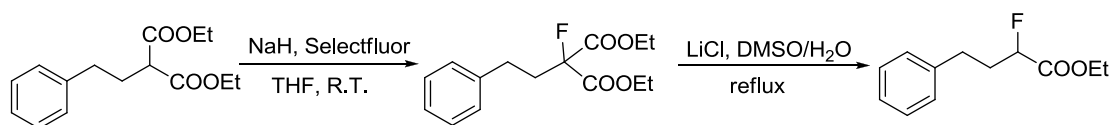

2) Typical synthetic route for the synthesis of  $\alpha$ -phenylated fluoroacetate **4**<sup>[2]</sup>

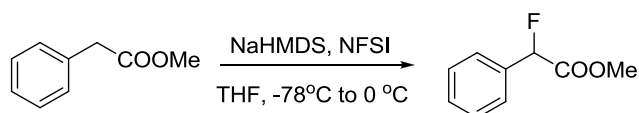

3) Typical synthetic route for the synthesis of  $\alpha$ -allylenylated fluoroacetate **6**<sup>[3]</sup>

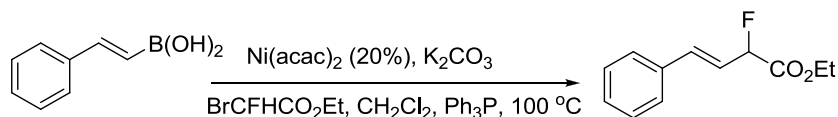

4) Typical synthetic route for the synthesis of ethyl 2-fluoropent-4-enoate **3j**<sup>[4]</sup>

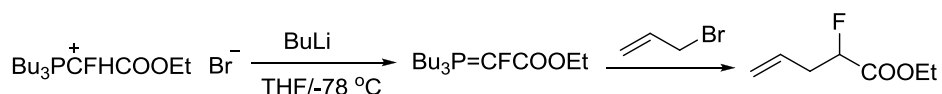

[1] X. Jiang, S. Sakthivel, K. Kulbitski, G. Nisnevich, M. Gandelman. *J. Am. Chem. Soc.* **2014**, *136*, 9548–9551.

[2] W. Zhong, S. Hitchcock, V. F. Patel, M. Croghan, T. Dineen, S. Harried, D. Horne, T. Judd, M. Kaller, C. Kreiman, P. Lopez, H. Monenschein, T. Nguyen, M. Weiss, Q. Xue, B. Yang, WO2008147547 (A1).

[3] Y. Su, G. Feng, W. Yu, Q. Lan, X. Wang. *Angew. Chem., Int. Ed.* **2015**, *54*, 6003–6007.

[4] A. Thenappan, D. J. Burton. *J. Org. Chem.* **1990**, *55*, 2311–2317.

### Typical Procedure for the Diastereoselective Addition of $\alpha$ -Alkylated Fluoroacetate **1** to *N*-*tert*-Butylsulfinyl Imines **2**.

Under a N<sub>2</sub> atmosphere, LHMDS (0.6 mL, 1.0 mol/L in THF, 1.2 equiv) was added to a mixture of  $\alpha$ -alkylated fluoroacetate **1** (0.6 mmol, 1.2 equiv), imine **2** (0.5 mmol, 1.0 equiv), TMEDA (0.15 mL), and THF (1.5 mL) at -70 °C. The reaction mixtures were stirred at this temperature for 0.5 h. Then, 1N NH<sub>4</sub>Cl/H<sub>2</sub>O (2.0 mL) was added, and the quenched reaction mixture was extracted three times with ethyl acetate (20 mL  $\times$  3). The combined organic layers were dried over Na<sub>2</sub>SO<sub>4</sub>, and the volatile solvents were removed under vacuum. The crude product was purified by flash column chromatography on silica gel to give the desired product **3**.

**(*Rs,2R*)-2-Fluoro-2-[(*S*)-(1,1-dimethylethylsulfinamido)(phenyl)methyl]-4-phenylbutyric Acid Ethyl Ester (**3a**).** By following the general procedure, **3a** was isolated by column chromatography on silica gel (petroleum ether/ethyl acetate = 3/1) as a white solid (168 mg, 80%), m.p. 115.1–115.8 °C;  $[\alpha]_D^{20} = -38.24$  ( $c = 0.48$ , CHCl<sub>3</sub>); <sup>1</sup>H NMR (400 MHz, CDCl<sub>3</sub>)  $\delta = 7.47$ – $7.32$  (m, 5H),  $7.29$ – $7.14$  (m, 3H),  $7.06$  (d,  $J = 7.1$  Hz, 2H),  $4.66$  (dd,  $J = 26.2, 10.5$  Hz, 1H),  $4.38$ – $4.18$  (m, 2H),  $4.08$  (d,  $J = 10.5$  Hz, 1H),  $2.83$ – $2.64$  (m, 1H),  $2.58$ – $2.39$  (m, 1H),  $2.10$  (dddd,  $J = 19.3, 14.4, 11.8, 5.4$  Hz, 1H),  $1.72$  (dddd,  $J = 14.3, 11.8, 9.5, 4.9$  Hz, 1H),  $1.37$  (t,  $J = 7.2$  Hz, 3H),  $1.19$  (s, 9H). <sup>19</sup>F NMR (376 MHz, CDCl<sub>3</sub>)  $\delta = -179.4$  (ddd,  $J = 35.5, 26.4, 8.8$  Hz). <sup>13</sup>C NMR (101 MHz, CDCl<sub>3</sub>)  $\delta = 169.9$  (d,  $J = 26.2$  Hz),  $140.2$ ,  $137.0$ ,  $128.8$ ,  $128.6$ ,  $128.49$  (d,  $J = 2.1$  Hz),  $128.43$ ,  $128.2$ ,  $126.2$ ,  $99.5$  (d,  $J = 196.0$  Hz),  $65.3$  (d,  $J = 19.0$  Hz),  $61.9$ ,  $56.6$ ,  $36.8$  (d,  $J = 21.7$  Hz),  $29.3$  (d,  $J = 3.3$  Hz),  $22.4$ ,  $14.2$ . IR (cm<sup>-1</sup>): 2953, 1733, 1556, 1460, 1243, 1175, 1057, 829, 748. MS (ESI)  $m/z$ : 420.2 [M + H]<sup>+</sup>. HRMS (ESI)  $m/z$ : calcd for C<sub>23</sub>H<sub>31</sub>FNO<sub>3</sub>S<sup>+</sup> [M + H]<sup>+</sup> 420.2003, found 420.2001.

**(*Rs,2R*)-2-Fluoro-2-[(*S*)-(1,1-dimethylethylsulfinamido)(phenyl)methyl]-5-phenylpentanoic Acid Ethyl Ester (**3b**).** By following the general procedure, **3b** was isolated by column chromatography on silica gel (petroleum ether/ethyl acetate = 3/1) as a white solid (160 mg, 74%), m.p. 119.9–120.5 °C;  $[\alpha]_D^{20} = -37.05$  ( $c = 0.55$ , CHCl<sub>3</sub>); <sup>1</sup>H NMR (400 MHz, CDCl<sub>3</sub>)  $\delta = 7.46$ – $7.31$  (m, 5H),  $7.26$

(dd,  $J = 12.9, 5.8$  Hz, 2H), 7.18 (t,  $J = 7.3$  Hz, 1H), 7.07 (d,  $J = 7.1$  Hz, 2 H), 4.61 (dd,  $J = 25.8, 10.6$  Hz, 1H), 4.26 (dddd,  $J = 25.1, 10.7, 7.2, 3.6$  Hz, 2H), 4.08 (d,  $J = 10.5$  Hz, 1H), 2.49 (dtd,  $J = 14.3, 8.6, 4.6$  Hz, 2H), 1.90–1.71 (m, 2H), 1.52–1.40 (m, 2H), 1.36–1.30 (m, 3H), 1.18 (s, 9H).  $^{19}\text{F}$  NMR (376 MHz,  $\text{CDCl}_3$ )  $\delta = -178.6$  (t,  $J = 29.6$  Hz).  $^{13}\text{C}$  NMR (101 MHz,  $\text{CDCl}_3$ )  $\delta = 170.0$  (d,  $J = 26.2$  Hz), 141.3, 137.1, 128.7, 128.6, 128.5 (d,  $J = 2.0$  Hz), 128.3, 128.2, 125.9, 99.9 (d,  $J = 195.3$  Hz), 65.3 (d,  $J = 19.4$  Hz), 61.8, 56.5, 35.4, 34.7 (d,  $J = 21.8$  Hz), 24.9 (d,  $J = 2.4$  Hz), 22.4, 14.2. IR ( $\text{cm}^{-1}$ ): 2956, 1740, 1541, 1507, 1459, 1253, 1038, 751, 729. MS (ESI)  $m/z$ : 434.2  $[\text{M} + \text{H}]^+$ . HRMS (ESI)  $m/z$ : calcd for  $\text{C}_{24}\text{H}_{33}\text{FNO}_3\text{S}^+$   $[\text{M} + \text{H}]^+$  434.2160, found 434.2151.

**(*Rs,2R*)-2-Fluoro-2-[(*S*)-(1,1-dimethylethylsulfonamido)(*p*-tolyl)methyl]-4-phenylbutyric Acid Ethyl Ester (3c).** By following the general procedure, **3c** was isolated by column chromatography on silica gel (petroleum ether/ethyl acetate = 3/1) as a white solid (199 mg, 92%), m.p. 124.6–125.6 °C;  $[\alpha]_{\text{D}}^{20} = -40.44$  ( $c = 0.69$ ,  $\text{CHCl}_3$ );  $^1\text{H}$  NMR (400 MHz,  $\text{CDCl}_3$ )  $\delta = 7.33$ –7.20 (m, 4H), 7.20–7.12 (m, 3H), 7.07 (d,  $J = 7.2$  Hz, 2H), 4.62 (dd,  $J = 26.5, 10.5$  Hz, 1H), 4.33–4.16 (m, 2H), 4.03 (d,  $J = 10.5$  Hz, 1H), 2.73 (td,  $J = 13.3, 4.8$  Hz, 1H), 2.57–2.40 (m, 1H), 2.34 (s, 3H), 2.19–1.97 (m, 1H), 1.81–1.63 (m, 1H), 1.37 (t,  $J = 7.1$  Hz, 3H), 1.19 (s, 9H).  $^{19}\text{F}$  NMR (376 MHz,  $\text{CDCl}_3$ )  $\delta = -179.7$  (br).  $^{13}\text{C}$  NMR (101 MHz,  $\text{CDCl}_3$ )  $\delta = 170.0$  (d,  $J = 26.3$  Hz), 140.3, 138.4, 134.0, 129.5, 128.4, 128.35, 128.32, 126.2, 99.6 (d,  $J = 195.7$  Hz), 65.2 (d,  $J = 18.9$  Hz), 61.9, 56.5, 36.7 (d,  $J = 21.8$  Hz), 29.3 (d,  $J = 3.2$  Hz), 22.4, 21.1, 14.3. IR ( $\text{cm}^{-1}$ ): 2952, 1756, 1556, 1467, 1245, 1176, 1057, 830, 749. MS (ESI)  $m/z$ : 434.2  $[\text{M} + \text{H}]^+$ . HRMS (ESI)  $m/z$ : calcd for  $\text{C}_{24}\text{H}_{33}\text{FNO}_3\text{S}^+$   $[\text{M} + \text{H}]^+$  434.2160, found 434.2160.

**(*Rs,2R*)-2-Fluoro-2-[(*S*)-(1,1-dimethylethylsulfonamido)(*p*-tolyl)methyl]-5-phenylpentanoic Acid Ethyl Ester (3d).** By following the general procedure, **3d** was isolated by column chromatography on silica gel (petroleum ether/ethyl acetate = 3/1) as a white solid (177 mg, 79%), m.p. 117.2–118.1 °C;  $[\alpha]_{\text{D}}^{20} = -29.13$  ( $c = 0.69$ ,  $\text{CHCl}_3$ );  $^1\text{H}$  NMR (400 MHz,  $\text{CDCl}_3$ )  $\delta = 7.33$ –7.20 (m, 4H), 7.20–7.12 (m, 3H), 7.07 (d,  $J = 7.2$  Hz, 2H), 4.62 (dd,  $J = 26.5, 10.5$  Hz, 1H), 4.33–4.16 (m, 2H), 4.03 (d,  $J = 10.5$  Hz, 1H), 2.73 (td,  $J = 13.3, 4.8$  Hz, 1H), 2.57–2.40 (m, 1H), 2.34 (s, 3H), 2.19–1.97 (m, 1H), 1.81–1.63 (m, 1H), 1.37 (t,  $J = 7.1$  Hz, 3H), 1.19 (s, 9H).  $^{19}\text{F}$  NMR (376 MHz,  $\text{CDCl}_3$ )  $\delta = -179.7$  (br).  $^{13}\text{C}$  NMR (101 MHz,  $\text{CDCl}_3$ )  $\delta = 170.0$  (d,  $J = 26.3$  Hz), 140.3, 138.4, 134.0, 129.5, 128.4, 128.35, 128.32, 126.2, 99.6 (d,  $J = 195.7$  Hz), 65.2 (d,  $J = 18.9$  Hz), 61.9, 56.5, 36.7 (d,  $J = 21.8$  Hz), 29.3 (d,  $J = 3.2$  Hz), 22.4, 21.1, 14.3. IR ( $\text{cm}^{-1}$ ): 2952, 1756, 1556, 1467, 1245, 1176, 1057, 830, 749. MS (ESI)  $m/z$ : 434.2  $[\text{M} + \text{H}]^+$ . HRMS (ESI)  $m/z$ : calcd for  $\text{C}_{24}\text{H}_{33}\text{FNO}_3\text{S}^+$   $[\text{M} + \text{H}]^+$  434.2160, found 434.2160.

= 0.58, CHCl<sub>3</sub>); <sup>1</sup>H NMR (400 MHz, CDCl<sub>3</sub>) δ = 7.26 (dd, *J* = 13.9, 6.5 Hz, 4H), 7.22–7.15 (m, 3H), 7.08 (d, *J* = 7.2 Hz, 2H), 4.57 (dd, *J* = 26.2, 10.6 Hz, 1H), 4.26 (dddd, *J* = 25.1, 10.7, 7.2, 3.6 Hz, 2H), 4.03 (d, *J* = 10.6 Hz, 1H), 2.56 (dd, *J* = 12.5, 6.9 Hz, 1H), 2.49–2.40 (m, 1H), 2.37 (s, 3H), 1.87–1.72 (m, 2H), 1.53–1.41 (m, 2H), 1.32 (t, *J* = 7.1 Hz, 3H), 1.18 (d, *J* = 6.2 Hz, 9H). <sup>19</sup>F NMR (376 MHz, CDCl<sub>3</sub>) δ = –178.8 (br). <sup>13</sup>C NMR (101 MHz, CDCl<sub>3</sub>) δ = 170.1 (d, *J* = 26.2 Hz), 141.4, 138.3, 134.1, 129.5 (d, *J* = 8.8 Hz), 128.4, 128.3, 128.3, 125.9, 100 (d, *J* = 195.1 Hz), 65.2 (d, *J* = 19.2 Hz), 61.8, 56.5, 35.4, 34.7 (d, *J* = 21.8 Hz), 24.9 (d, *J* = 2.6 Hz), 22.4, 21.2, 14.2. IR (cm<sup>-1</sup>): 2955, 1732, 1472, 1456, 1326, 1150, 1104, 1068, 862. MS (ESI) *m/z*: 448.2 [M + H]<sup>+</sup>. HRMS (ESI) *m/z*: calcd for C<sub>25</sub>H<sub>35</sub>FNO<sub>3</sub>S<sup>+</sup> [M + H]<sup>+</sup> 448.2316, found 448.2307.

**(*Rs,2R*)-4-(1,3-Dioxan-2-yl)-2-fluoro-2-[(*S*)-(1,1-dimethylethylsulfonamido)(phenyl)methyl]-butyric Acid Ethyl Ester (3e).** By following the general procedure, **3e** was isolated by column chromatography on silica gel (petroleum ether/ethyl acetate = 3/1) as a white solid (189 mg, 88%), m.p. 120.3–122.8 °C; [α]<sub>D</sub><sup>20</sup> = –3.290 (*c* = 0.60, CHCl<sub>3</sub>); <sup>1</sup>H NMR (400 MHz, CDCl<sub>3</sub>) δ = 7.76–6.98 (m, 5H), 4.62 (dd, *J* = 26.1, 10.6 Hz, 1H), 4.41–4.33 (m, 1H), 4.33–4.17 (m, 2H), 4.03 (dd, *J* = 17.4, 7.3 Hz, 3H), 3.66 (t, *J* = 11.9 Hz, 2H), 2.10–1.51 (m, 6H), 1.35 (t, *J* = 7.1 Hz, 3H), 1.17 (s, 9H). <sup>19</sup>F NMR (376 MHz, CDCl<sub>3</sub>) δ = –179.2 (d, *J* = 27.1 Hz). <sup>13</sup>C NMR (101 MHz, CDCl<sub>3</sub>) δ = 169.5 (d, *J* = 26.0 Hz), 136.9, 129.8 (d, *J* = 3.5 Hz), 128.8, 128.7, 128.5 (d, *J* = 2.0 Hz), 120.0, 99.5 (d, *J* = 196.8 Hz), 65.8, 65.2 (d, *J* = 18.8 Hz), 56.6, 39.7 (d, *J* = 21.4 Hz), 30.5, 22.4, 19.2, 13.6. IR (cm<sup>-1</sup>): 2921, 1749, 1255, 1201, 1112, 1073, 1024, 994, 885. MS (ESI) *m/z*: 430.2 [M + H]<sup>+</sup>. HRMS (ESI) *m/z*: calcd for C<sub>21</sub>H<sub>33</sub>FNO<sub>5</sub>S<sup>+</sup> [M + H]<sup>+</sup> 430.2058, found 430.2051.

**(*Rs,2R*)-4-Benzoyloxy-2-fluoro-2-[(*S*)-(3-trifluoromethylphenyl) (1,1-dimethylethylsulfonamido) methyl]-butyric Acid Ethyl Ester (3f).** By following the general procedure, **3f** was isolated by column chromatography on silica gel (petroleum ether/ethyl acetate = 3/1) as a white solid (197 mg, 76%), m.p. 80.9–81.2 °C;

$[\alpha]_{\text{D}}^{20} = -9.88$  ( $c = 0.50$ ,  $\text{CHCl}_3$ );  $^1\text{H NMR}$  (400 MHz,  $\text{CDCl}_3$ )  $\delta = 7.57$  (dt,  $J = 18.8, 7.6$  Hz, 4H), 7.38–7.23 (m, 5H), 4.71 (dd,  $J = 24.8, 10.8$  Hz, 1H), 4.41 (s, 2H), 4.19 (d,  $J = 10.4$  Hz, 1H), 4.08 (dd,  $J = 13.8, 6.9$  Hz, 2H), 3.63–3.39 (m, 2H), 2.38–2.14 (m, 1H), 1.72–1.49 (m, 1H), 1.19 (d,  $J = 5.2$  Hz, 9 H).  $^{19}\text{F NMR}$  (376 MHz,  $\text{CDCl}_3$ )  $\delta = -62.3 - -64.3$  (m),  $-179.3$  (br).  $^{13}\text{C NMR}$  (101 MHz,  $\text{CDCl}_3$ )  $\delta = 169.4$  (d,  $J = 25.9$  Hz), 138.1, 137.7, 132.0, 131.0 (d,  $J = 32.6$  Hz), 129.3, 128.3, 127.8, 127.7, 125.62, 125.58, 125.45, 97.2 (d,  $J = 195.8$  Hz), 73.3, 65.0 (d,  $J = 19.4$  Hz), 64.0 (d,  $J = 4.2$  Hz), 62.0, 56.8, 35.4 (d,  $J = 21.5$  Hz), 22.3, 13.9. IR ( $\text{cm}^{-1}$ ): 2956, 1732, 1456, 1326, 1163, 1104, 1070, 863. MS (ESI)  $m/z$ : 518.2  $[\text{M} + \text{H}]^+$ . HRMS (ESI)  $m/z$ : calcd for  $\text{C}_{25}\text{H}_{32}\text{F}_4\text{NO}_4\text{S}^+$   $[\text{M} + \text{H}]^+$  518.1983, found 518.1971.

**(*Rs,2R*)-4-Benzoyloxy-2-[(*S*)-(4-bromophenyl)(1,1-dimethylethylsulfinamido)methyl]-2-fluoro-butyric Acid Ethyl Ester (3g).** By following the general procedure, **3g** was isolated by column chromatography on silica gel (petroleum ether/ethyl acetate = 3/1) as a white solid (200 mg, 76%), m.p. 71.1–71.2 °C;  $[\alpha]_{\text{D}}^{20} = -2.92$  ( $c = 0.47$ ,  $\text{CHCl}_3$ );  $^1\text{H NMR}$  (400 MHz,  $\text{CDCl}_3$ )  $\delta = 7.50$  (d,  $J = 8.4$  Hz, 2H), 7.36–7.19 (m, 7H), 4.60 (dd,  $J = 25.6, 10.8$  Hz, 1H), 4.39 (s, 2H), 4.07 (ddd,  $J = 12.0, 7.3, 5.1$  Hz, 3H), 3.49 (ddd,  $J = 19.1, 9.6, 4.6$  Hz, 2H), 2.34–2.11 (m, 1H), 1.70–1.50 (m, 1H), 1.23–1.15 (m, 12H).  $^{19}\text{F NMR}$  (376 MHz,  $\text{CDCl}_3$ )  $\delta = -180.1$  (t,  $J = 28.9$  Hz).  $^{13}\text{C NMR}$  (101 MHz,  $\text{CDCl}_3$ )  $\delta = 169.5$  (d,  $J = 26.0$  Hz), 137.8, 136.1, 131.9, 130.3 (d,  $J = 2.1$  Hz), 128.3, 127.8, 127.7, 122.9, 97.2 (d,  $J = 195.4$  Hz), 73.3, 65.0 (d,  $J = 19.1$  Hz), 64.1 (d,  $J = 4.3$  Hz), 61.9, 56.7, 35.4 (d,  $J = 21.5$  Hz), 22.3, 13.9. IR ( $\text{cm}^{-1}$ ): 2924, 1720, 1460, 1274, 1230, 1130, 1108, 1047, 837. MS (ESI)  $m/z$ : 528.1  $[\text{M} + \text{H}]^+$ . HRMS (ESI)  $m/z$ : calcd for  $\text{C}_{24}\text{H}_{32}\text{BrFNO}_4\text{S}^+$   $[\text{M} + \text{H}]^+$  528.1214, found 528.1206.

**(*Rs,2R*)-2-Fluoro-2-[(*S*)-(1,1-dimethylethylsulfinamido) (*p*-tolyl)methyl]-hexanedioic Diethyl Ester (3h).** By following the general procedure, **3h** was isolated by column chromatography on silica gel (petroleum ether/ethyl acetate = 2/1) as a pale yellow liquid (137 mg, 60%),  $[\alpha]_{\text{D}}^{20} = -21.30$  ( $c = 0.30$ ,  $\text{CHCl}_3$ );  $^1\text{H$

NMR (400 MHz, CDCl<sub>3</sub>)  $\delta$  = 7.20 (dd,  $J$  = 18.6, 8.0 Hz, 4H), 4.56 (dd,  $J$  = 26.4, 10.5 Hz, 1H), 4.37–4.18 (m, 2H), 4.15–4.04 (m, 2H), 3.99 (d,  $J$  = 10.5 Hz, 1H), 2.35 (s, 3H), 2.20 (t,  $J$  = 7.3 Hz, 2H), 1.80–1.67 (m, 2H), 1.57–1.38 (m, 4H), 1.35 (t,  $J$  = 7.1 Hz, 3H), 1.23 (t,  $J$  = 7.1 Hz, 3H), 1.17 (s, 9 H). <sup>19</sup>F NMR (376 MHz, CDCl<sub>3</sub>)  $\delta$  = -179.1 – -179.5 (m). <sup>13</sup>C NMR (101 MHz, CDCl<sub>3</sub>)  $\delta$  = 173.2, 170.1 (d,  $J$  = 26.3 Hz), 138.4, 134.1, 129.5, 128.3 (d,  $J$  = 2.0 Hz), 100.9, 65.2 (d,  $J$  = 18.9 Hz), 61.8, 60.3, 56.5, 34.7 (d,  $J$  = 21.8 Hz), 33.9, 24.6, 22.6 (d,  $J$  = 2.9 Hz), 22.4, 21.2, 14.2 (d,  $J$  = 3.1 Hz). IR (cm<sup>-1</sup>): 2949, 2360, 1757, 1649, 1559, 1457, 1243, 1174, 833. MS (ESI)  $m/z$ : 458.2 [M + H]<sup>+</sup>. HRMS (ESI)  $m/z$ : calcd for C<sub>23</sub>H<sub>36</sub>FNO<sub>5</sub>S<sup>+</sup> [M + H]<sup>+</sup> 458.2371, found 458.2362.

**(*Rs,2R,4E*)-2-Fluoro-2-[(*S*)-(1,1-dimethylethylsulfinamido) (phenyl)methyl]-5-phenylpentenoic Acid Ethyl Ester (3i).** By following the general procedure, **3i** was isolated by column chromatography on silica gel (petroleum ether/ethyl acetate = 3/1) as a white solid (160 mg, 74%), m.p. 120.0–122.1 °C;  $[\alpha]_D^{20}$  = -36.23 ( $c$  = 0.56, CHCl<sub>3</sub>); <sup>1</sup>H NMR (400 MHz, CDCl<sub>3</sub>)  $\delta$  = 7.48–7.16 (m, 10H), 6.35 (d,  $J$  = 15.8 Hz, 1H), 6.02 (ddd,  $J$  = 15.3, 8.7, 6.2 Hz, 1H), 4.69 (dd,  $J$  = 26.0, 10.4 Hz, 1H), 4.22 (tdd,  $J$  = 10.3, 7.1, 3.8 Hz, 2H), 4.06 (d,  $J$  = 10.2 Hz, 1H), 2.59 (ddd,  $J$  = 35.2, 14.5, 8.9 Hz, 1H), 2.40–2.23 (m, 1H), 1.26 (t,  $J$  = 7.1 Hz, 3H), 1.17 (s, 9H). <sup>19</sup>F NMR (376 MHz, CDCl<sub>3</sub>)  $\delta$  = -155.5 – -155.8 (m). <sup>13</sup>C NMR (101 MHz, CDCl<sub>3</sub>)  $\delta$  = 169.5 (d,  $J$  = 25.8 Hz), 136.8, 136.7, 134.9, 128.82, 128.76, 128.5, 127.6, 126.2, 120.94, 120.91, 99.6 (d,  $J$  = 197.2 Hz), 65.0 (d,  $J$  = 18.7 Hz), 61.9, 56.6, 39.0 (d,  $J$  = 21.5 Hz), 22.4, 14.3. IR (cm<sup>-1</sup>): 2988, 1733, 1653, 1538, 1501, 1457, 1072, 977, 753. MS (ESI)  $m/z$ : 432.3 [M + H]<sup>+</sup>. HRMS (ESI)  $m/z$ : calcd for C<sub>24</sub>H<sub>31</sub>FNO<sub>3</sub>S<sup>+</sup> [M + H]<sup>+</sup> 432.2003, found 432.1995.

**(*Rs,2R*)-2-Fluoro-2-[(*S*)-(1,1-dimethylethylsulfinamido) (phenyl)methyl]-pentenoic Acid Ethyl Ester (3j).** By following the general procedure, **3j** was isolated by column chromatography on silica gel (petroleum ether/ethyl acetate = 3/1) as a white solid (153 mg, 86%), m.p. 84.6–85.4 °C;  $[\alpha]_D^{20}$  = -18.76 ( $c$  = 0.54,



CHCl<sub>3</sub>); <sup>1</sup>H NMR (400 MHz, CDCl<sub>3</sub>) δ = 7.50–7.31 (m, 5H), 5.68 (dddd, *J* = 16.1, 10.1, 8.6, 5.8 Hz, 1H), 5.09 (dd, *J* = 20.7, 13.6 Hz, 2H), 4.66 (dd, *J* = 26.1, 10.5 Hz, 1H), 4.26 (dddd, *J* = 17.9, 14.3, 9.0, 5.4 Hz, 2H), 4.09 (d, *J* = 10.4 Hz, 1H), 2.45 (ddd, *J* = 36.3, 14.6, 8.5 Hz, 1H), 2.18 (ddd, *J* = 14.8, 10.8, 5.7 Hz, 1H), 1.34 (t, *J* = 7.2 Hz, 3H), 1.19 (s, 9H). <sup>19</sup>F NMR (376 MHz, CDCl<sub>3</sub>) δ = -156.0 – -156.2 (m). <sup>13</sup>C NMR (101 MHz, CDCl<sub>3</sub>) δ = 169.4 (d, *J* = 26.0 Hz), 136.8, 129.7 (d, *J* = 3.3 Hz), 128.8, 128.7, 128.5, 120.1, 99.4 (d, *J* = 196.8 Hz), 65.1 (d, *J* = 18.6 Hz), 61.9, 56.6, 39.7 (d, *J* = 21.5 Hz), 22.3, 14.2. IR (cm<sup>-1</sup>): 2949, 1731, 1325, 1294, 1229, 1130, 1068, 937, 837. MS (ESI) *m/z*: 356.2 [M + H]<sup>+</sup>. HRMS (ESI) *m/z*: calcd for C<sub>18</sub>H<sub>27</sub>FNO<sub>3</sub>S<sup>+</sup> [M + H]<sup>+</sup> 356.1690, found 356.1693.

**(*R*,*2R*,*3S*)-2-Fluoro-3-(1,1-dimethylethylsulfonamido)-2-(naphthalen-1-ylmethyl)-3-(*p*-tolyl) propionic Acid Ethyl Ester (3k).** By following the general procedure, **3k** was isolated by column chromatography on silica gel (petroleum ether/ethyl acetate = 3/1) as a white solid (190 mg, 81%), m.p. 122.1–125.4 °C; [α]<sub>D</sub><sup>20</sup> = 14.25 (*c* = 0.52, CHCl<sub>3</sub>); <sup>1</sup>H NMR (400 MHz, CDCl<sub>3</sub>) δ = 7.83–7.70 (m, 3H), 7.58 (s, 1H), 7.49–7.42 (m, 2H), 7.39 (d, *J* = 7.5 Hz, 2H), 7.27 (dd, *J* = 12.2, 4.3 Hz, 3H), 4.80 (dd, *J* = 25.9, 10.5 Hz, 1H), 4.03 (dt, *J* = 14.3, 8.9 Hz, 3H), 3.15 (dd, *J* = 39.1, 14.5 Hz, 1H), 2.89 (d, *J* = 13.3 Hz, 1H), 2.39 (s, 3H), 1.18 (s, 9H), 1.01 (t, *J* = 7.2 Hz, 3H). <sup>19</sup>F NMR (376 MHz, CDCl<sub>3</sub>) δ = -173.3 – -182.0 (m). <sup>13</sup>C NMR (101 MHz, CDCl<sub>3</sub>) δ = 169.4 (d, *J* = 25.6 Hz), 138.6, 134.1, 133.2, 132.6, 131.4, 129.7, 128.8, 128.5, 128.0, 127.8, 127.6, 127.5, 126.0, 125.8, 100.3, 65.5 (d, *J* = 18.7 Hz), 61.7, 56.5, 41.7, 22.4, 21.2, 13.9. IR (cm<sup>-1</sup>): 3299, 2917, 1788, 1508, 1501, 1402, 1301, 1120, 1061. MS (ESI) *m/z*: 470.2 [M + H]<sup>+</sup>. HRMS (ESI) *m/z*: calcd for C<sub>27</sub>H<sub>33</sub>FNO<sub>3</sub>S<sup>+</sup> [M + H]<sup>+</sup> 470.2160, found 470.2160.

**(*R*,*2R*,*3S*)-2-Benzyl-2-fluoro-3-(1,1-dimethylethylsulfonamido)-3-(4-nitrophenyl)propionic Acid Ethyl Ester (3l).** By following the general procedure, **3l** was isolated by column chromatography on silica gel (petroleum ether/ethyl acetate = 3/1) as a white solid (153 mg, 68%), m.p. 110.2–110.7 °C; [α]<sub>D</sub><sup>20</sup> = 2.71 (*c* = 0.

75, CHCl<sub>3</sub>); <sup>1</sup>H NMR (400 MHz, CDCl<sub>3</sub>) δ = 8.31 (d, *J* = 8.6 Hz, 2H), 7.66 (d, *J* = 8.3 Hz, 2H), 7.26 (dd, *J* = 8.3, 4.9 Hz, 3H), 7.18–7.00 (m, 2H), 4.90 (dd, *J* = 23.7, 11.0 Hz, 1H), 4.29 (d, *J* = 10.9 Hz, 1H), 4.06 (d, *J* = 7.1 Hz, 2H), 3.07 (dd, *J* = 38.6, 14.4 Hz, 1H), 2.69 (t, *J* = 14.0 Hz, 1H), 1.19 (s, 9H), 1.08 (t, *J* = 7.1 Hz, 3H). <sup>19</sup>F NMR (376 MHz, CDCl<sub>3</sub>) δ = -175.6 – -176.5 (m). <sup>13</sup>C NMR (101 MHz, CDCl<sub>3</sub>) δ = 168.8 (d, *J* = 25.0 Hz), 148.2, 144.1, 132.9, 129.9, 129.7 (d, *J* = 2.2 Hz), 128.4, 127.6, 124.0, 99.4 (d, *J* = 199.7 Hz), 64.7 (d, *J* = 19.7 Hz), 62.1, 57.0, 41.5 (d, *J* = 20.8 Hz), 22.3, 13.9. IR (cm<sup>-1</sup>): 2920, 1733, 1649, 1558, 1503, 1347, 1210, 1135, 1035. MS (ESI) *m/z*: 451.2 [M + H]<sup>+</sup>. HRMS (ESI) *m/z*: calcd for C<sub>22</sub>H<sub>28</sub>FN<sub>2</sub>O<sub>5</sub>S<sup>+</sup> [M + H]<sup>+</sup> 451.1697, found 451.1688.

**(*Rs,2R,3S*)-2-Benzyl-2-fluoro-3-(furan-2-yl)-3-(1,1-dimethylethylsulfinamido)-propionic Acid Ethyl Ester (3m).** By following the general procedure, **3m** was isolated by column chromatography on silica gel (petroleum ether/ethyl acetate = 3/1) as a white solid (164 mg, 83%), m.p. 147.7–148.1 °C; [α]<sub>D</sub><sup>20</sup> = -11.00 (*c* = 0.54, CHCl<sub>3</sub>); <sup>1</sup>H NMR (400 MHz, CDCl<sub>3</sub>) δ = 7.48 (d, *J* = 0.9 Hz, 1H), 7.29–7.20 (m, 3H), 7.14 (d, *J* = 7.2 Hz, 2H), 6.49 (d, *J* = 3.1 Hz, 1H), 6.41 (dd, *J* = 3.1, 1.8 Hz, 1H), 4.86 (dd, *J* = 24.2, 10.9 Hz, 1H), 4.08–3.95 (m, 3H), 3.06 (dd, *J* = 37.0, 14.5 Hz, 1H), 2.89 (t, *J* = 14.2 Hz, 1H), 1.16 (s, 9H), 1.06 (t, *J* = 7.2 Hz, 3H). <sup>19</sup>F NMR (376 MHz, CDCl<sub>3</sub>) δ = -174.7 – -175.2 (m). <sup>13</sup>C NMR (101 MHz, CDCl<sub>3</sub>) δ = 168.7 (d, *J* = 25.3 Hz), 149.9, 143.2, 133.5, 130.0, 128.3, 127.3, 110.7, 109.8, 99.17 (d, *J* = 199.8 Hz), 61.7, 59.4 (d, *J* = 20.3 Hz), 56.7, 40.9 (d, *J* = 21.1 Hz), 22.4, 13.9. IR (cm<sup>-1</sup>): 3335, 2958, 1765, 1515, 1475, 1431, 1366, 1249, 1062. MS (ESI) *m/z*: 396.2 [M + H]<sup>+</sup>. HRMS (ESI) *m/z*: calcd for C<sub>20</sub>H<sub>27</sub>FNO<sub>4</sub>S<sup>+</sup> [M + H]<sup>+</sup> 396.1639, found 396.1637.

**(*Rs,2R*)-2-Benzyl-2-fluoro-3-(1,1-dimethylethylsulfinamido)-3,3-diphenylpropionic Acid Ethyl Ester (3n).** By following the general procedure, **3n** was isolated by column chromatography on silica gel (petroleum ether/ethyl acetate = 3/1) as a white solid (198 mg, 80%), m.p. 144.7–146.1 °C; [α]<sub>D</sub><sup>20</sup> = -0.63 (*c* = 0.49, CHCl<sub>3</sub>); <sup>1</sup>H

NMR (400 MHz, CDCl<sub>3</sub>)  $\delta$  = 7.64 (d,  $J$  = 7.5 Hz, 2H), 7.49–7.43 (m, 2H), 7.38–7.29 (m, 8H), 7.21 (dd,  $J$  = 17.2, 7.2 Hz, 3H), 5.52 (s, 1H), 3.97–3.74 (m, 2H), 3.03–2.81 (m, 2H), 2.78–2.51 (m, 2H), 1.31 (d,  $J$  = 5.2 Hz, 9H), 0.99 (t,  $J$  = 7.1 Hz, 3H). <sup>19</sup>F NMR (376 MHz, CDCl<sub>3</sub>)  $\delta$  = –164.2 (br). <sup>13</sup>C NMR (101 MHz, CDCl<sub>3</sub>)  $\delta$  = 141.8, 140.5, 138.4, 130.9, 129.8 (d,  $J$  = 4.6 Hz), 128.5 (d,  $J$  = 11.2 Hz), 128.1 (d,  $J$  = 16.1 Hz), 127.6 (d,  $J$  = 18.5 Hz), 126.3, , 72.7, 72.5, 62.0, 57.3, 36.0, 29.7 (d,  $J$  = 6.6 Hz), 23.2, 13.6. IR (cm<sup>-1</sup>): 2914, 1705, 1448, 1369, 1305, 1229, 1076, 1008, 835. MS (ESI)  $m/z$ : 496.2 [M + H]<sup>+</sup>. HRMS (ESI)  $m/z$ : calcd for C<sub>20</sub>H<sub>27</sub>FNO<sub>4</sub>S<sup>+</sup> [M + H]<sup>+</sup> 496.2316, found 496.2301.

**Typical Procedure for the Diastereoselective Addition of  $\alpha$ -Phenylated Fluoroacetate **4** to *N*-*tert*-Butylsulfinyl Imines **2**.**

Under a N<sub>2</sub> atmosphere, LHMDS (0.6 mL, 1.0 mol/L in THF, 1.2 equiv) was added to a mixture of  $\alpha$ -phenylated fluoroacetate **4** (0.6 mmol, 1.2 equiv), imine **2** (0.5 mmol, 1.0 equiv), TMEDA (0.15 mL), and THF (1.5 mL) at –70 °C. Reaction mixtures were stirred at this temperature for 0.5 h. Then, 1N TFA /THF (2 mL) was added, and the quenched reaction mixture was extracted three times with ethyl acetate (20 mL  $\times$  3). The combined organic layers were dried over anhydrous Na<sub>2</sub>SO<sub>4</sub>, and the volatile solvents were removed under vacuum. The crude product was purified by flash column chromatography on silica gel to give the corresponding product **5**.

**(*R*<sub>s</sub>,*2R*,*3R*)-2-Fluoro-3-(1,1-dimethylethylsulfinamido)-2,3-diphenylpropionic Acid Methyl Ester (**5a**).** By following the general procedure, **5a** was isolated by column chromatography on silica gel (petroleum ether/ethyl acetate = 3/1) as a white solid (144 mg, 76%), m.p . 160.0–160.2 °C;  $[\alpha]_D^{20}$  = –114.05 ( $c$  = 0.61, CHCl<sub>3</sub>); <sup>1</sup>H NMR (400 MHz, CDCl<sub>3</sub>)  $\delta$  = 7.74 (d,  $J$  = 7.2 Hz, 2H), 7.48 (dq,  $J$  = 14.4, 7.2 Hz, 5H), 7.38 (d,  $J$  = 3.3 Hz, 3H), 5.31 (dd,  $J$  = 25.7, 1.8 Hz, 1H), 3.59 (d,  $J$  = 7.2 Hz, 4H), 1.04 (s, 9H). <sup>19</sup>F NMR (376 MHz, CDCl<sub>3</sub>)  $\delta$  = –178.6 (d,  $J$  = 26.3 Hz). <sup>13</sup>C NMR (101 MHz, CDCl<sub>3</sub>)  $\delta$  = 168.5 (d,  $J$  = 25.6 Hz), 134.7, 134.2, 130.1 (d,  $J$  = 1.9 Hz), 129.6, 129.1 (d,  $J$  = 1.8 Hz), 128.9, 128.2, 125.4 (d,  $J$  = 10.3 Hz), 97.9 (d,  $J$  = 202.4 Hz), 62.6 (d,  $J$  = 19.0 Hz), 55.8, 52.8, 22.3. IR (cm<sup>-1</sup>): 2955, 1757, 1450, 1255, 1131, 1072, 1029,

811, 737. MS (ESI)  $m/z$ : 378.2  $[M + H]^+$ . HRMS (ESI)  $m/z$ : calcd for  $C_{20}H_{25}FNO_3S^+$   $[M + H]^+$  378.1534, found 378.1530.

**(*Rs,2R,3R*)-2-Fluoro-3-(1,1-dimethylethylsulfonamido)-2-phenyl-3-(*p*-tolyl)propionic Acid Methyl Ester (5b).** By following the general procedure, **5b** was isolated by column chromatography on silica gel (petroleum ether/ethyl acetate = 3/1) as a white solid (141 mg, 72%), m.p. 166.0–166.3 °C;  $[\alpha]_D^{20} = -119.35$  ( $c = 0.50$ ,  $CHCl_3$ );  $^1H$  NMR (400 MHz,  $CDCl_3$ )  $\delta = 7.78$ – $7.67$  (m, 2H), 7.59–7.41 (m, 3H), 7.36 (d,  $J = 6.9$  Hz, 2H), 7.18 (d,  $J = 7.9$  Hz, 2H), 5.28 (dd,  $J = 25.8$ , 1.7 Hz, 1H), 3.58 (d,  $J = 25.3$  Hz, 4H), 2.38 (s, 3H), 1.04 (s, 9H).  $^{19}F$  NMR (376 MHz,  $CDCl_3$ )  $\delta = -178.7$  (d,  $J = 25.8$  Hz).  $^{13}C$  NMR (101MHz,  $CDCl_3$ )  $\delta = 168.6$ , 138.7, 134.4, 131.5, 129.9, 129.5, 129.1 (d,  $J = 2.0$  Hz), 129.0, 125.4 (d,  $J = 10.3$  Hz), 97.7 (d,  $J = 202.4$  Hz), 62.3 (d,  $J = 18.9$  Hz), 55.7, 52.8, 22.3, 21.3. IR ( $cm^{-1}$ ): 2954, 1754, 1450, 1365, 1257, 1134, 1066, 826, 795. MS (ESI)  $m/z$ : 392.2  $[M + H]^+$ . HRMS (ESI)  $m/z$ : calcd for  $C_{21}H_{27}FNO_3S^+$   $[M + H]^+$  392.1690, found 392.1682.

**(*Rs,2R,3R*)-3-(4-Bromophenyl)-2-fluoro-3-(1,1-dimethylethylsulfonamido)-2-phenyl propionic acid methyl ester (5c).** By following the general procedure, **5c** was isolated by column chromatography on silica gel (petroleum ether/ethyl acetate = 3/1) as a white solid (164 mg, 72%), m.p. 161.8–162.7 °C;  $[\alpha]_D^{20} = -103.42$  ( $c = 0.49$ ,  $CHCl_3$ );  $^1H$  NMR (400 MHz,  $CDCl_3$ )  $\delta = 7.70$  (d,  $J = 7.1$  Hz, 2 H), 7.54–7.40 (m, 5H), 7.36 (d,  $J = 7.4$  Hz, 2H), 5.28 (dd,  $J = 25.3$ , 1.1 Hz, 1H), 3.61(d,  $J = 14.3$  Hz, 4H), 1.04 (s, 9H).  $^{19}F$  NMR (376 MHz,  $CDCl_3$ )  $\delta = -178.7$  (d,  $J = 25.2$  Hz).  $^{13}C$  NMR (101 MHz,  $CDCl_3$ )  $\delta = 168.4$  (d,  $J = 25.4$  Hz), 134.0 (t,  $J = 11.4$  Hz), 133.8 (d,  $J = 4.9$  Hz), 131.8 (d,  $J = 2.0$  Hz), 131.5, 129.7, 129.2 (d,  $J = 1.9$  Hz), 125.3 (d,  $J = 10.4$  Hz), 123.2, 97.7 (d,  $J = 202.7$  Hz), 61.9 (d,  $J = 19.3$  Hz), 55.8, 53.0, 22.2. IR ( $cm^{-1}$ ): 2953, 1743, 1487, 1433, 1364, 1272, 1073, 1011, 823. MS (ESI)  $m/z$ : 456.1  $[M + H]^+$ . HRMS (ESI)  $m/z$ : calcd for  $C_{20}H_{24}BrFNO_3S^+$   $[M + H]^+$  456.0639, found 456.0631.

**(*Rs,2R,3R*)-2-(4-Chlorophenyl)-2-fluoro-3-(1,1-dimethylethylsulfonamido)-3-phenyl**

**propionic Acid Methyl Ester (5d).** By following the general procedure, **5d** was isolated by column chromatography on silica gel (petroleum ether/ethyl acetate = 3/1) as a white solid (157 mg, 76%), m.p. 146.8–147.1 °C;  $[\alpha]_D^{20} = -77.74$  ( $c = 0.61$ ,  $\text{CHCl}_3$ );  $^1\text{H NMR}$  (400 MHz,  $\text{CDCl}_3$ )  $\delta = 7.63$  (d,  $J = 8.4$  Hz, 2H), 7.41 (dd,  $J = 27.5$ , 15.1 Hz, 7H), 5.24 (d,  $J = 25.2$  Hz, 1H), 3.88 (s, 1H), 3.58 (d,  $J = 5.7$  Hz, 3H), 1.04 (s, 9H).  $^{19}\text{F NMR}$  (376 MHz,  $\text{CDCl}_3$ )  $\delta = -177.3$  (d,  $J = 24.5$  Hz).  $^{13}\text{C NMR}$  (101 MHz,  $\text{CDCl}_3$ )  $\delta = 168.2$  (d,  $J = 25.4$  Hz), 135.8, 134.5, 132.6 (d,  $J = 23.4$  Hz), 129.9, 129.2, 129.0, 128.3, 127.0, 97.6, 62.6 (d,  $J = 19.3$  Hz), 55.9, 53.0, 22.3. IR ( $\text{cm}^{-1}$ ): 2959, 1758, 1739, 1646, 1558, 1540, 1270, 1071, 825. MS (ESI)  $m/z$ : 412.1  $[\text{M} + \text{H}]^+$ . HRMS (ESI)  $m/z$ : calcd for  $\text{C}_{20}\text{H}_{24}\text{ClFNO}_3\text{S}^+$   $[\text{M} + \text{H}]^+$  412.1144, found 412.1137.

**(*Rs,2R,3R*)-2-(2-Chlorophenyl)-2-fluoro-3-(1,1-dimethylethylsulfonamido)-3-phenyl propionic Acid Methyl Ester (5e).** By following the general procedure, **5e** was isolated by column chromatography on silica gel (petroleum ether/ethyl acetate = 3/1) as a white solid (195 mg, 95%), m.p. 166.3–167.2 °C;  $[\alpha]_D^{20} = -99.65$  ( $c = 0.50$ ,  $\text{CHCl}_3$ );  $^1\text{H NMR}$  (400 MHz,  $\text{CDCl}_3$ )  $\delta = 7.64$  (dd,  $J = 5.9$ , 3.6 Hz, 1H), 7.47–7.42 (m, 1H), 7.41–7.29 (m, 7H), 5.50 (dd,  $J = 21.4$ , 2.6 Hz, 1H), 4.19 (d,  $J = 2.1$  Hz, 1H), 3.62 (s, 3H), 1.14 (s, 9H).  $^{19}\text{F NMR}$  (376 MHz,  $\text{CDCl}_3$ )  $\delta = -162.1$  (br).  $^{13}\text{C NMR}$  (101 MHz,  $\text{CDCl}_3$ )  $\delta = 167.7$  (d,  $J = 24.3$  Hz), 134.9, 132.6 (d,  $J = 10.6$  Hz), 132.3, 131.4, 130.8, 130.3, 129.3 (d,  $J = 11.4$  Hz), 128.8, 127.9 (d,  $J = 15.2$  Hz), 127.0, 96.8 (d,  $J = 196.3$  Hz), 61.3 (d,  $J = 22.5$  Hz), 55.9, 53.0, 24.2. IR ( $\text{cm}^{-1}$ ): 2956, 1767, 1656, 1558, 1507, 1457, 1247, 1064, 759. MS (ESI)  $m/z$ : 412.1  $[\text{M} + \text{H}]^+$ . HRMS (ESI)  $m/z$ : calcd for  $\text{C}_{20}\text{H}_{24}\text{ClFNO}_3\text{S}^+$   $[\text{M} + \text{H}]^+$  412.1144, found 412.1136.

**(*Rs,2R,3R*)-2-(2-Chlorophenyl)-2-fluoro-3-((*S*)-1,1-dimethylethylsulfonamido)-3-(*p*-tolyl)propionic Acid Methyl Ester (5f).** By following the general procedure, **5f** was isolated by column chromatography on silica gel (petroleum ether/ethyl acetate = 3/1) as a white solid (204 mg, 96%), m.p. 162.6–162.7 °C;  $[\alpha]_D^{20} = -16.37$  ( $c = 0.50$ ,  $\text{CHCl}_3$ );  $^1\text{H NMR}$  (400 MHz,  $\text{CDCl}_3$ )  $\delta = 7.64$  (dd,  $J = 5.8$ , 3.7 Hz, 1H), 7.45 (dd,  $J = 5.6$ , 3.7 Hz, 1H), 7.41–7.34 (m, 2H), 7.23 (d,  $J = 7.5$  Hz, 2H), 7.13 (d,  $J = 7.9$  Hz, 2H), 5.48 (dd,  $J = 21.6$ , 2.3 Hz, 1H), 4.1

3 (s, 1H), 3.62 (s, 3H), 2.37 (s, 3H), 1.14 (s, 9H).  $^{19}\text{F}$  NMR (376 MHz,  $\text{CDCl}_3$ )  $\delta = -162.5$  (br).  $^{13}\text{C}$  NMR (101 MHz,  $\text{CDCl}_3$ )  $\delta = 167.6$  (d,  $J = 24.6$  Hz), 138.6, 132.6, 131.7, 131.4, 130.7, 130.2, 129.4 (d,  $J = 11.5$  Hz), 128.7, 127.0, 96.8 (d,  $J = 196.2$  Hz), 60.9 (d,  $J = 22.4$  Hz), 55.8, 53.0, 22.4, 21.3. IR ( $\text{cm}^{-1}$ ): 2958, 1765, 1515, 1475, 1431, 1366, 1249, 1063, 830. MS (ESI)  $m/z$ : 426.1  $[\text{M} + \text{H}]^+$ . HRMS (ESI)  $m/z$ : calcd for  $\text{C}_{21}\text{H}_{26}\text{ClFNO}_3\text{S}^+$   $[\text{M} + \text{H}]^+$  426.1300, found 426.1292.

**(*Rs,2R,3R*)-2-Fluoro-3-(1,1-dimethylethylsulfinamido)-2-(4-methoxyphenyl)-3-(*p*-tolyl)propionic Acid Methyl Ester (5g).** By following the general procedure, **5g** was isolated by column chromatography on silica gel (petroleum ether/ethyl acetate = 3/1) as a white solid (168 mg, 80%), m.p. 119.7–120.8 °C;  $[\alpha]_D^{20} = -9.430$  ( $c = 0.50$ ,  $\text{CHCl}_3$ );  $^1\text{H}$  NMR (400 MHz,  $\text{CDCl}_3$ )  $\delta = 7.42$ – $7.31$  (m, 3H), 7.26 (dd,  $J = 15.5, 10.1$  Hz, 3H), 7.15 (d,  $J = 7.7$  Hz, 2H), 6.95 (d,  $J = 8.1$  Hz, 1H), 5.25 (d,  $J = 25.9$  Hz, 1H), 3.83 (d,  $J = 13.7$  Hz, 3H), 3.57 (d,  $J = 8.1$  Hz, 4H), 2.35 (s, 3H), 1.03 (s, 9H).  $^{19}\text{F}$  NMR (376 MHz,  $\text{CDCl}_3$ )  $\delta = -177.6$  (d,  $J = 25.2$  Hz).  $^{13}\text{C}$  NMR (101 MHz,  $\text{CDCl}_3$ )  $\delta = 168.4$  (d,  $J = 25.7$  Hz), 160.1, 138.7, 135.7 (d,  $J = 23.1$  Hz), 131.4, 130.1, 129.0, 115.4, 110.8 (d,  $J = 11.1$  Hz), 97.8 (d,  $J = 202.4$  Hz), 62.0 (d,  $J = 18.8$  Hz), 60.4, 55.6 (d,  $J = 25.7$  Hz), 52.9, 22.3, 21.3. IR ( $\text{cm}^{-1}$ ): 2956, 1752, 1599, 1430, 1261, 1177, 1035, 1064, 889. MS (ESI)  $m/z$ : 444.1  $[\text{M} + \text{Na}]^+$ . HRMS (ESI)  $m/z$ : calcd for  $\text{C}_{22}\text{H}_{28}\text{FNNaO}_4\text{S}^+$   $[\text{M} + \text{Na}]^+$  444.1612, found 444.1615.

**(*Rs,2R,3R*)-2-Fluoro-3-(1,1-dimethylethylsulfinamido)-3-phenyl-2-(*p*-tolyl)propionic Acid Ethyl Ester (5h).** By following the general procedure, **5h** was isolated by column chromatography on silica gel (petroleum ether/ethyl acetate = 3/1) as a white solid (167 mg, 82%), m.p. 140.4–140.6 °C;  $[\alpha]_D^{20} = -97.61$  ( $c = 0.50$ ,  $\text{CHCl}_3$ );  $^1\text{H}$  NMR (400 MHz,  $\text{CDCl}_3$ )  $\delta = 7.62$  (d,  $J = 8.3$  Hz, 2H), 7.55–7.44 (m, 2H), 7.40–7.29 (m, 5H), 5.28 (dd,  $J = 25.8, 1.4$  Hz, 1H), 4.03 (tdd,  $J = 10.7, 7.1, 3.6$  Hz, 2H), 3.58 (s, 1H), 2.40 (s, 3H), 1.07 (t,  $J = 7.2$  Hz, 3H), 1.04 (d,  $J = 5.4$  Hz, 9H).  $^{19}\text{F}$  NMR (376 MHz,  $\text{CDCl}_3$ )  $\delta = -178.7$  (d,  $J = 26.3$  Hz).  $^{13}\text{C}$  NMR (101 MHz,  $\text{CDCl}_3$ )  $\delta = 168.0$  (d,  $J = 25.6$  Hz), 139.4,

134.8, 131.3 (d,  $J = 23.1$  Hz) , 130.2, 129.7, 128.8, 128.1, 125.3 (d,  $J = 10.1$  Hz), 97.7 (d,  $J = 201.9$  Hz), 62.5 (d,  $J = 18.7$  Hz), 62.1, 55.7, 22.3, 21.2, 13.8. IR ( $\text{cm}^{-1}$ ): 2956, 1750, 1515, 1467, 1368, 1257, 1105, 1072, 824, 721. MS (ESI)  $m/z$ : 406.2  $[\text{M} + \text{H}]^+$  . HRMS (ESI)  $m/z$ : calcd for  $\text{C}_{22}\text{H}_{29}\text{FNO}_3\text{S}^+$   $[\text{M} + \text{H}]^+$  406.1847, found 406.1840.

***(Rs,2R,3R)-2-Fluoro-3-(1,1-dimethylethylsulfonamido)-2,3-di-p-tolylpropionic Acid***

***Ethyl Ester (5i)***. By following the general procedure, **5i** was isolated by column chromatography on silica gel (petroleum ether/ethyl acetate = 3/1) as a white solid (187 mg, 89%), m.p. 144.2–144.9 °C;  $[\alpha]_{\text{D}}^{20} = -113.76$  ( $c = 0.50$ ,  $\text{CHCl}_3$ );  $^1\text{H}$  NMR (400 MHz,  $\text{CDCl}_3$ )  $\delta = 7.61$  (d,  $J = 8.3$  Hz, 2H), 7.38 (d,  $J = 7.0$  Hz, 2H), 7.29 (d,  $J = 8.4$  Hz, 2H), 7.17 (d,  $J = 7.9$  Hz, 2H), 5.26 (d,  $J = 25.9$  Hz, 1H), 4.14–3.91 (m, 2H), 3.55 (s, 1H), 2.40 (s, 3H), 2.37 (s, 3H), 1.10 (t,  $J = 7.1$  Hz, 3H), 1.04 (s, 9H).  $^{19}\text{F}$  NMR (376 MHz,  $\text{CDCl}_3$ )  $\delta = -178.8$  (d,  $J = 26.3$  Hz).  $^{13}\text{C}$  NMR (101 MHz,  $\text{CDCl}_3$ )  $\delta = 168.1$  (d,  $J = 26.2$  Hz), 139.4, 138.6, 131.6, 131.4 (d,  $J = 23.1$  Hz), 130.1, 129.7, 129.5, 128.9, 125.3 (d,  $J = 10.1$  Hz), 97.7 (d,  $J = 201.3$  Hz), 62.1, 55.7, 22.3, 21.2, 13.8. IR ( $\text{cm}^{-1}$ ): 2955, 1745, 1515, 1467, 1368, 1254, 1104, 1072, 824. MS (ESI)  $m/z$ :  $[\text{M} + \text{H}]^+$  420.2. HRMS (ESI)  $m/z$ : calcd for  $\text{C}_{23}\text{H}_{31}\text{FNO}_3\text{S}^+$   $[\text{M} + \text{H}]^+$  420.1995, found 420.2003.

***(Rs,2R,3R)-2-Fluoro-3-(furan-2-yl)-3-(1,1-dimethylethylsulfonamido)-2-phenylpropionic Acid Methyl Ester (5j)***

By following the general procedure, **5j** was isolated by column chromatography on silica gel (petroleum ether/ethyl acetate = 3/1) as a white solid (155 mg, 85%), m.p. 150.3–151.1 °C;  $[\alpha]_{\text{D}}^{20} = -80.96$  ( $c = 0.56$ ,  $\text{CHCl}_3$ );  $^1\text{H}$  NMR (400 MHz,  $\text{CDCl}_3$ )  $\delta = 7.6$  (d,  $J = 7.7$  Hz, 2H), 7.54–7.35 (m, 4H), 6.55–6.28 (m, 2H), 5.42 (dd,  $J = 25.8, 4.9$  Hz, 1H), 3.68 (s, 3H), 3.53 (dd,  $J = 16.3, 11.7$  Hz, 1H), 1.01 (s, 9H).  $^{19}\text{F}$  NMR (376 MHz,  $\text{CDCl}_3$ )  $\delta = -177.2$  (d,  $J = 26.3$  Hz).  $^{13}\text{C}$  NMR (101 MHz,  $\text{CDCl}_3$ )  $\delta = 168.5$  (d,  $J = 25.4$  Hz) , 149.0, 143.0, 133.9 (d,  $J = 22.6$  Hz), 129.5, 128.9, 125.2 (d,  $J = 10.3$  Hz), 110.5 (d,  $J = 3.3$  Hz), 97.5 (d,  $J = 200.8$  Hz), 58.3, 58.1, 56.3, 53.1, 22.2. IR ( $\text{cm}^{-1}$ ): 2958, 1756, 1451, 1259, 1133, 1074, 1033, 824, 7

43. MS (ESI)  $m/z$ : 368.1  $[M + H]^+$ . HRMS (ESI)  $m/z$ : calcd for  $C_{18}H_{23}FNO_4S$   
 $^+ [M + H]^+$  368.1326, found 368.1319.

**(*Rs,2R,3R*)-2-Fluoro-3-(1,1-dimethylethylsulfonamido)-2-phenylhexanoic Acid Methyl Ester (5k).** By following the general procedure, **5k** was isolated by column chromatography on silica gel (petroleum ether/ethyl acetate = 3/1) as a white solid (155 mg, 85%), m.p. 81.2–82.2 °C;  $[\alpha]_D^{20} = -71.67$  ( $c = 0.47$ ,  $CHCl_3$ );  $^1H$  NMR (400 MHz,  $CDCl_3$ )  $\delta = 7.60$ – $7.29$  (m, 5H), 4.20–4.04 (m, 1H), 3.78 (s, 3H), 3.28 (d,  $J = 6.5$  Hz, 1H), 1.84–1.69 (m, 1H), 1.68–1.48 (m, 2H), 1.41 (dt,  $J = 16.9, 8.4$  Hz, 1H), 1.03 (s, 9H), 0.92 (t,  $J = 7.1$  Hz, 3H).  $^{19}F$  NMR (376 MHz,  $CDCl_3$ )  $\delta = -177.0$  (d,  $J = 26.3$  Hz).  $^{13}C$  NMR (101 MHz,  $CDCl_3$ )  $\delta = 172.8, 135.3, 129.5, 128.7, 127.8, 124.6$  (d,  $J = 10.3$  Hz), 57.5, 56.3, 52.2, 34.2, 22.6 (d,  $J = 9.8$  Hz), 18.8, 13.9. IR ( $cm^{-1}$ ): 2956, 1740, 1653, 1641, 1558, 1457, 1263, 1034, 729. MS (ESI)  $m/z$ : 366.1  $[M + Na]^+$ . HRMS (ESI)  $m/z$ : calcd for  $C_{17}H_{26}FNNaO_3S^+$   $[M + Na]^+$  366.1510, found 366.1510.

**Typical Procedure for the Diastereoselective Addition of  $\alpha$ -Allenylated Fluoroacetate 6 to *N*-*tert*-Butylsulfinyl Imines 2.**

Under a  $N_2$  atmosphere, LHMDS (0.6 mL, 1.0 mol/L in THF, 1.2 equiv) was added slowly to a mixture of  $\alpha$ -allenylated fluoroacetate **6** (0.6 mmol, 1.2 equiv), imine **2** (0.5 mmol, 1.0 equiv), TMEDA (0.15 mL), and THF (1.5 mL) at  $-70$  °C. The reaction mixtures were stirred at this temperature for 0.5 h. Then, 1N TFA/THF (2.0 mL) was added, and the quenched reaction mixture was extracted three times with ethyl acetate (20 mL  $\times$  3). The combined organic layers were dried over  $Na_2SO_4$ , and the volatile solvents were removed under vacuum. The crude product was purified by flash column chromatography on silica gel to give the corresponding product **7**.

**(*Rs,2S,3R,3E*)-2-Fluoro-2-[(1,1-dimethylethylsulfonamido)(phenyl)methyl]-4-phenylbutenoic Acid Ethyl Ester (7a).** By following the general procedure, **7a** was isolated by column chromatography on silica gel (petroleum ether/ethyl acetate = 3/1) as a white solid (104 mg, 50%), m.p. 128.1–129.5 °C;  $[\alpha]_D^{20} = -194.63$  ( $c = 0.53$ ,  $CHCl_3$ );  $^1H$  NMR (400 MHz,  $CDCl_3$ )  $\delta = 7.45$  (d,  $J = 7.6$  Hz, 2 H), 7.42–7.28 (m, 8H), 6.95 (d,  $J = 16.1$  Hz, 1H), 6.39 (dd,  $J = 20.4, 16.1$  Hz,



z, 1H), 4.93 (d,  $J = 23.0$  Hz, 1H), 4.10 (dd,  $J = 13.6, 6.4$  Hz, 3H), 1.22–1.09 (m, 12H).  $^{19}\text{F}$  NMR (376 MHz,  $\text{CDCl}_3$ )  $\delta = -177.8$  (t,  $J = 21.4$  Hz).  $^{13}\text{C}$  NMR (101 MHz,  $\text{CDCl}_3$ )  $\delta = 167.6$  (d,  $J = 25.4$  Hz), 135.1, 135.0, 133.9, 133.8, 129.6, 128.8, 128.7, 128.2, 127.1, 123.1 (d,  $J = 19.0$  Hz), 97.2 (d,  $J = 202.7$  Hz), 62.3, 62.1, 56.0, 22.5, 13.9. IR ( $\text{cm}^{-1}$ ): 2965, 1753, 1558, 1456, 1365, 1245, 1069, 978, 858. MS (ESI)  $m/z$ : 418.2  $[\text{M} + \text{H}]^+$ . HRMS (ESI)  $m/z$ : calcd for  $\text{C}_{23}\text{H}_{29}\text{FNO}_3\text{S}^+ [\text{M} + \text{H}]^+$  418.1847, found 418.1847.

**(*Rs,2S,3R,3E*)-2-Fluoro-2-[(1,1-dimethylethylsulfinamido)(*p*-tolyl)methyl]-4-phenylbutenoic Acid Ethyl Ester (7b)**. By following the general procedure, **7b** was isolated by column chromatography on silica gel (petroleum ether/ethyl acetate = 3/1) as a white solid (155 mg, 72%), m.p. 135.1–136.3 °C;  $[\alpha]_{\text{D}}^{20} = -180.55$  ( $c = 0.60$ ,  $\text{CHCl}_3$ );  $^1\text{H}$  NMR (400 MHz,  $\text{CDCl}_3$ )  $\delta = 7.44$  (d,  $J = 7.4$  Hz, 2H), 7.40–7.25 (m, 5H), 7.14 (d,  $J = 8.0$  Hz, 2H), 6.95 (d,  $J = 16.1$  Hz, 1H), 6.38 (dd,  $J = 20.5, 16.1$  Hz, 1H), 4.89 (d,  $J = 22.8$  Hz, 1H), 4.18–3.98 (m, 3H), 2.34 (s, 3H), 1.22–1.12 (m, 12H).  $^{19}\text{F}$  NMR (376 MHz,  $\text{CDCl}_3$ )  $\delta = -177.7$  (t,  $J = 20.8$  Hz).  $^{13}\text{C}$  NMR (101 MHz,  $\text{CDCl}_3$ )  $\delta = 167.6$  (d,  $J = 25.4$  Hz), 138.7, 135.1, 133.8, 133.7, 131.8, 129.4, 129.0, 128.8, 127.0, 123.2 (d,  $J = 19.0$  Hz), 97.2 (d,  $J = 202.0$  Hz), 62.2, 61.8 (d,  $J = 19.6$  Hz), 55.9, 22.5, 21.2, 14.0. IR ( $\text{cm}^{-1}$ ): 2949, 1758, 1469, 1364, 1246, 1151, 1098, 1035, 835. MS (ESI)  $m/z$ : 432.2  $[\text{M} + \text{H}]^+$ . HRMS (ESI)  $m/z$ : calcd for  $\text{C}_{24}\text{H}_{31}\text{FNO}_3\text{S}^+ [\text{M} + \text{H}]^+$  432.2003, found 432.2002.

## X-ray crystal structure of 5k

The thermal ellipsoids are drawn at a 30% probability level.

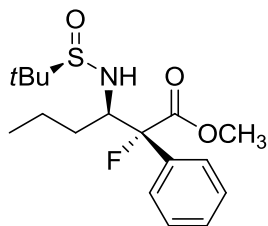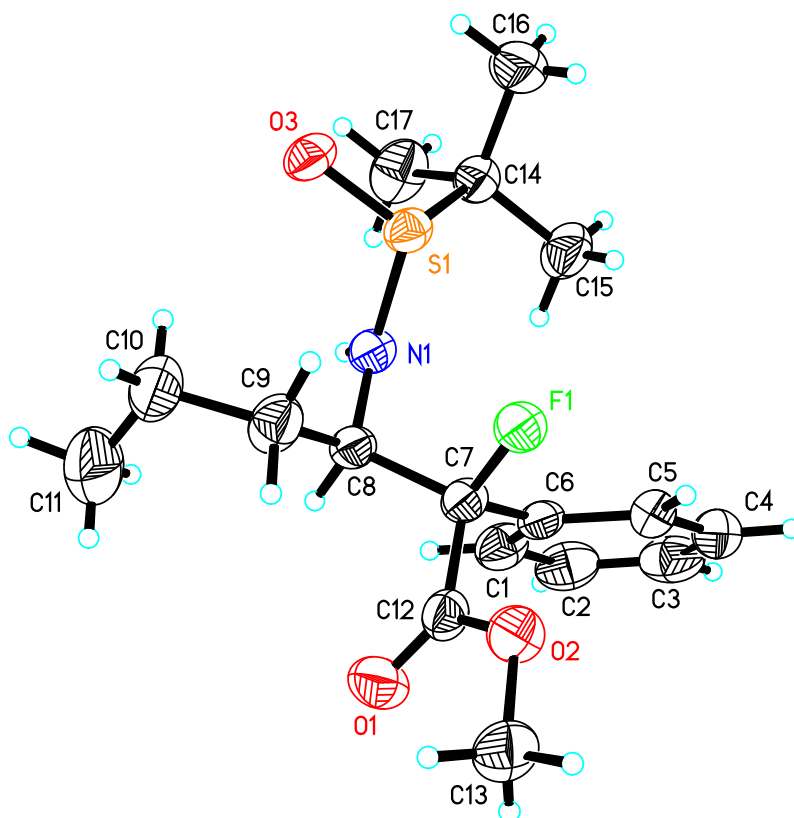

## X-ray crystal structure of 7a

The thermal ellipsoids are drawn at a 30% probability level.

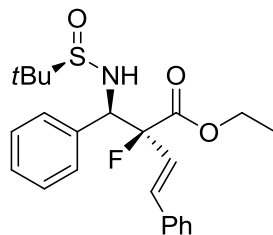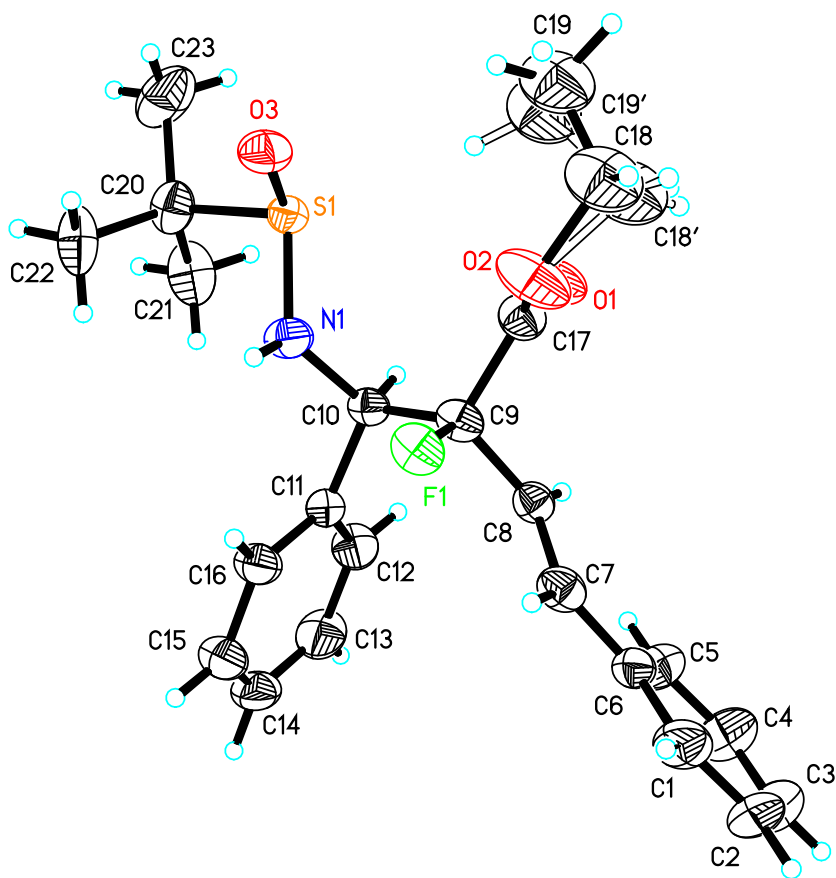

**d.r.** Determination by  $^{19}\text{F}$  NMR on the Crude Products **3**, **5** and **7**.

Crude **3a**, d.r. = 91:2:2:5

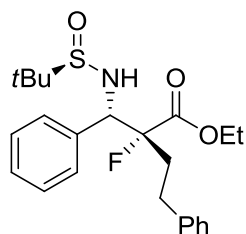

$\delta$ -174.60  
 $\delta$ -176.85  
 $\delta$ -177.83  
 $\delta$ -179.20  
 $\delta$ -179.23

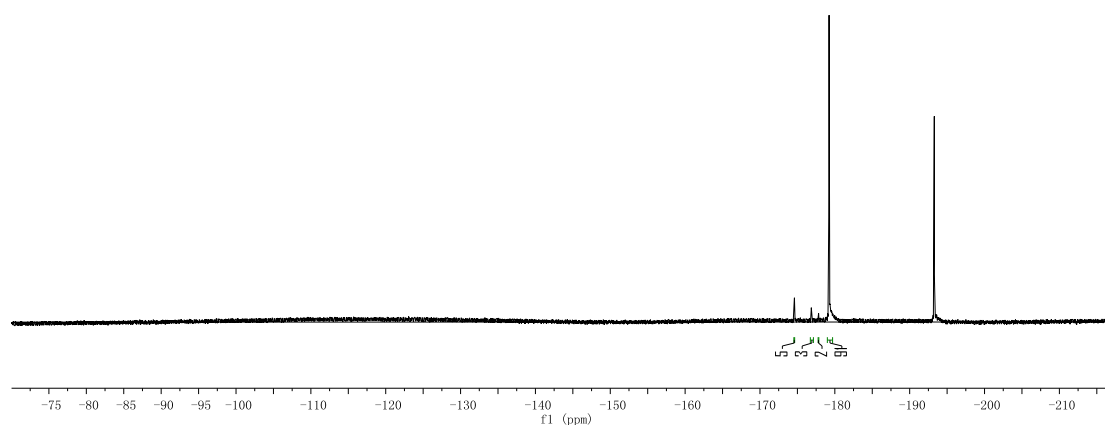

The stereoisomers are at  $\delta$  -174.6 (br),  $\delta$  -176.8 (br),  $\delta$  -177.8 (br), and  $\delta$  -179.2 (d,  $J$  = 10.0 Hz).

Crude **3b**, d.r. = 84:6:6:4

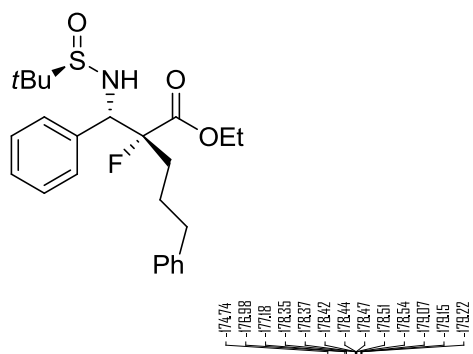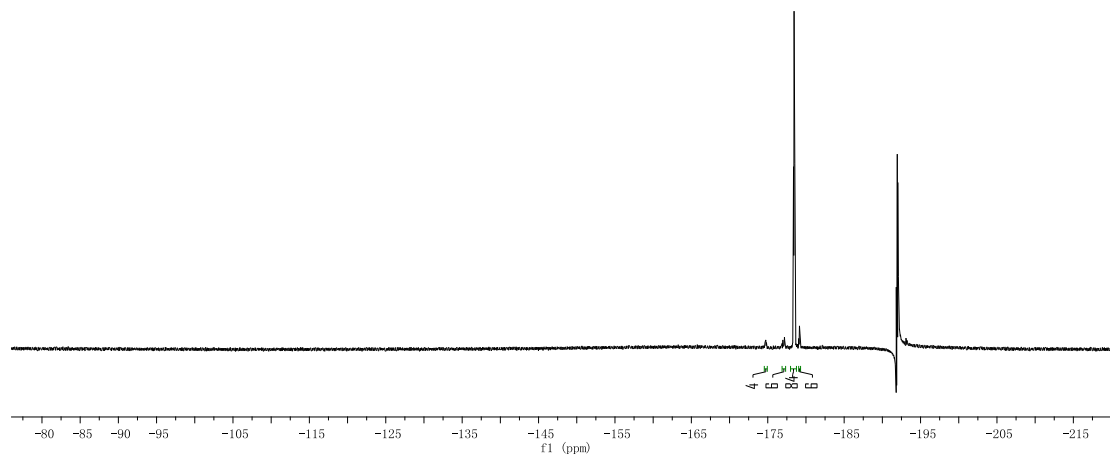

The stereoisomers are at  $\delta$  -174.7 (s),  $\delta$  -177.0 (d,  $J = 77.5$  Hz),  $\delta$  -178.4 (ddd,  $J = 35.4, 26.6, 8.6$  Hz), and  $\delta$  -179.1 (t,  $J = 27.0$  Hz)

Crude **3c**, d.r. = 89:2:4:5

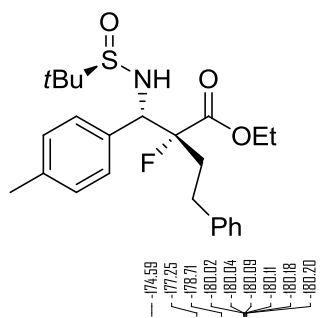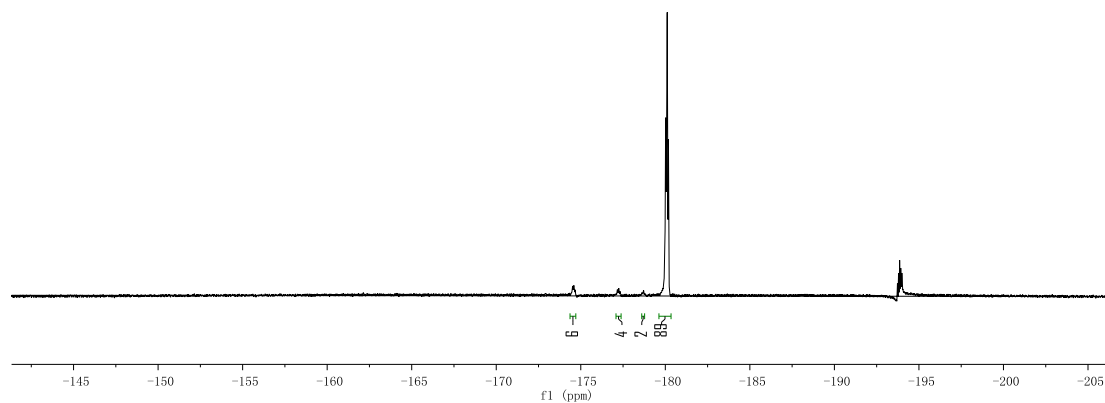

The stereoisomers are at  $\delta$  -174.5 (br),  $\delta$  -177.2 (br),  $\delta$  -178.7 (br), and  $\delta$  -179.6 – -180.3 (m).

Crude **3d**, d.r. = 88:6:2:4

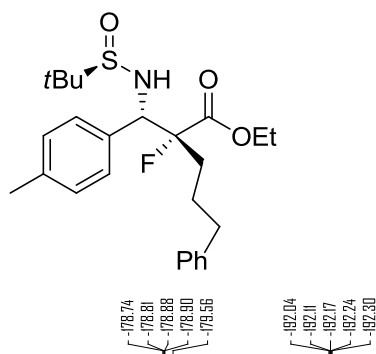

The stereoisomers are at  $\delta$  -176.8– -177.1 (m),  $\delta$  -177.3 – -177.7 (m),  $\delta$  -178.8 (dd,  $J$  = 44.5, 17.4 Hz), and  $\delta$  -179.5 (br).

Crude **3e**, d.r. = 93:7

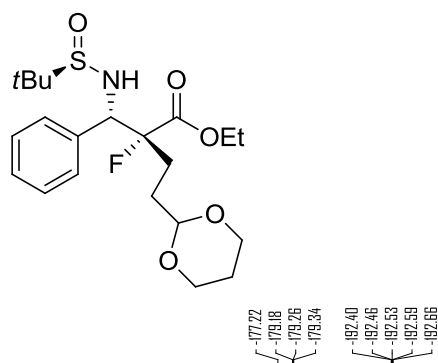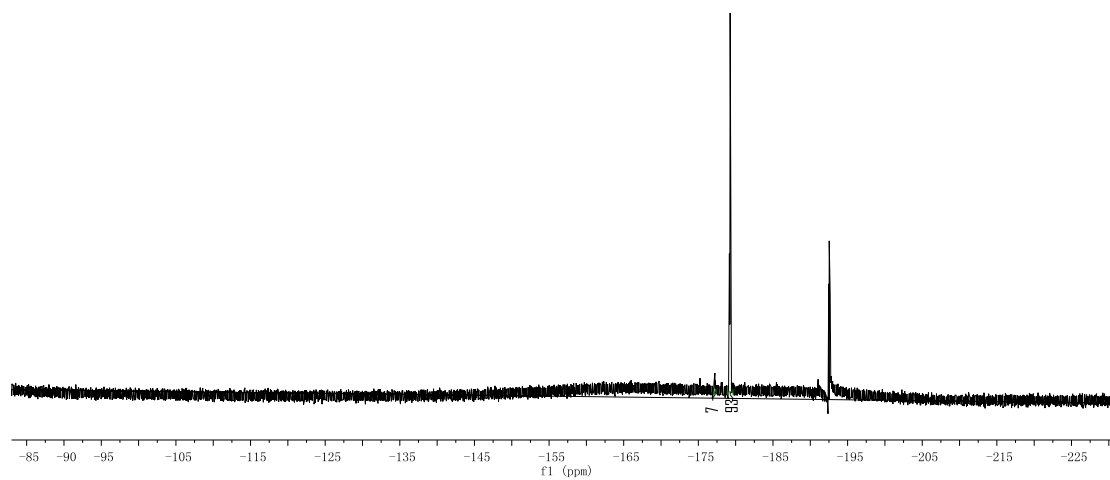

The stereoisomers are at  $\delta -177.2$  (s),  $\delta -179.2$  (t,  $J = 31.2$  Hz).



Crude **3f**, d.r. = 86:8:6

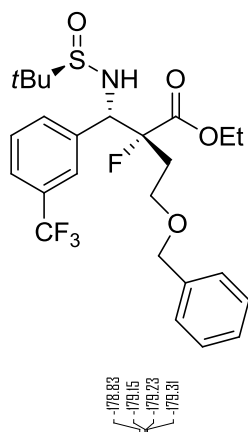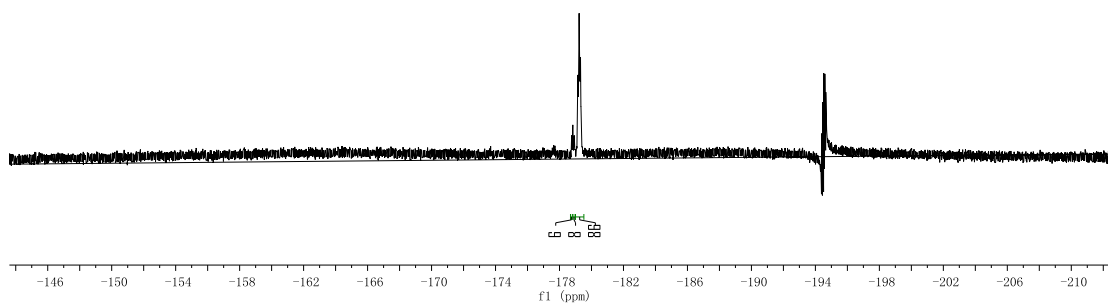

The stereoisomers are at  $\delta$  -178.7 (br),  $\delta$  -178.84– -178.9 (m), and  $\delta$  -179.0– -179.5 (m).

Crude **3g**, d.r. = 91:6:3

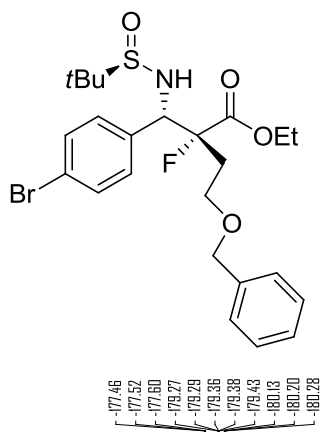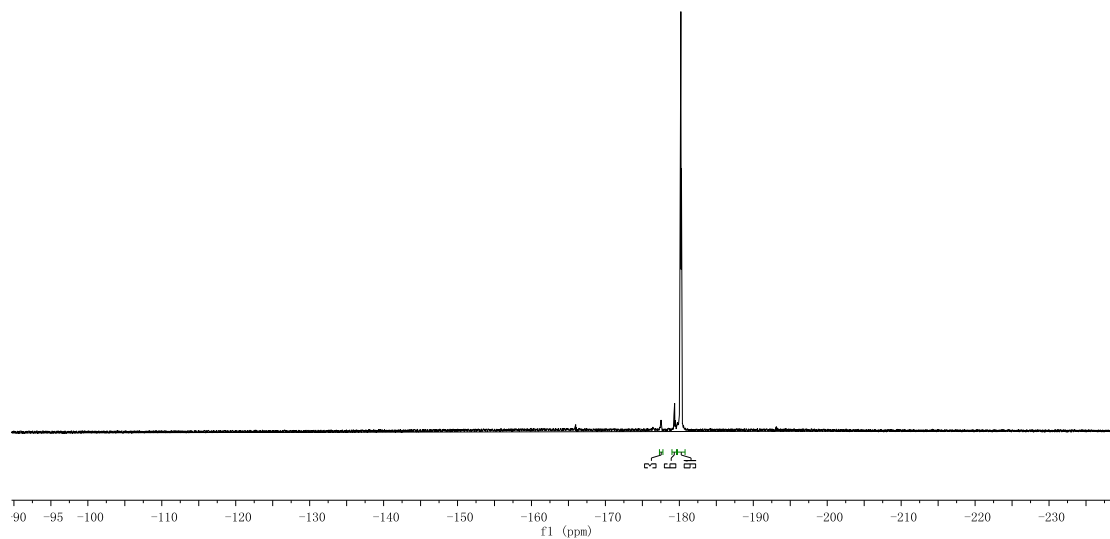

The stereoisomers are at  $\delta$  -177.3 – -177.7 (m),  $\delta$  -179.0 – -179.6 (m), and  $\delta$  -180.2 (t,  $J = 28.8$  Hz).

Crude **3h**, d.r. = 90:4:3:3

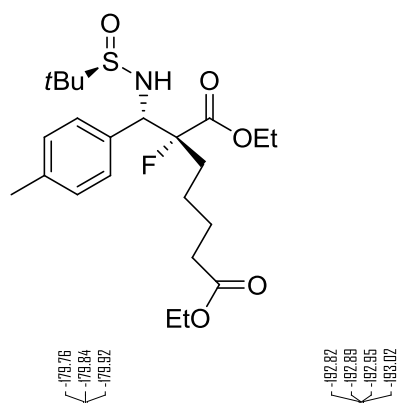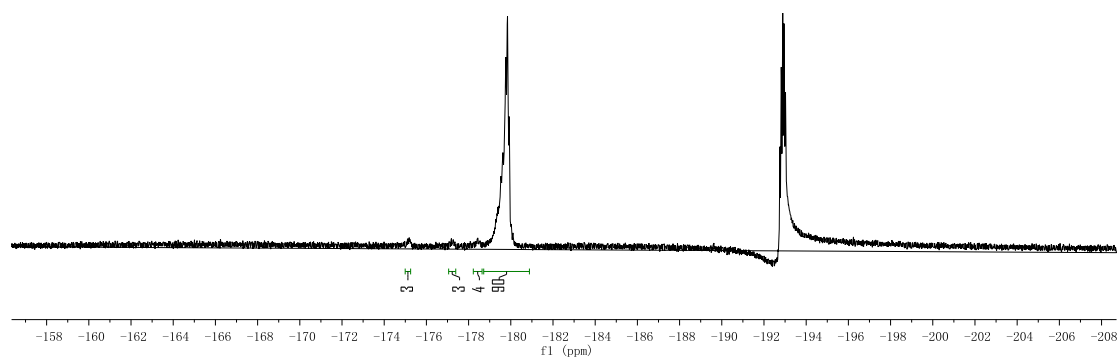

The stereoisomers are at  $\delta$  -174.9 – -175.2 (m),  $\delta$  -177.0 – -177.3 (m),  $\delta$  -178.2 – -178.6 (m), and  $\delta$  -178.7 – -180.8 (m).

Crude **3i**, d.r. = 98:2

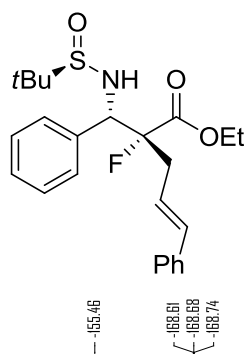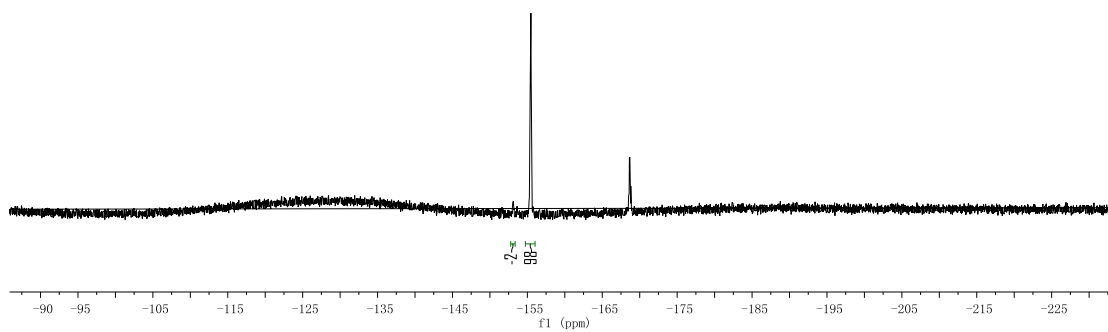

The stereoisomers are at  $\delta$  -152.8 – -153.3 (m),  $\delta$  -155.4 (br).

Crude **3j**, d.r. = 97:3

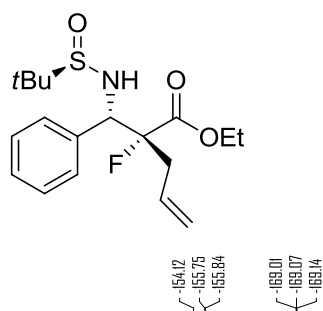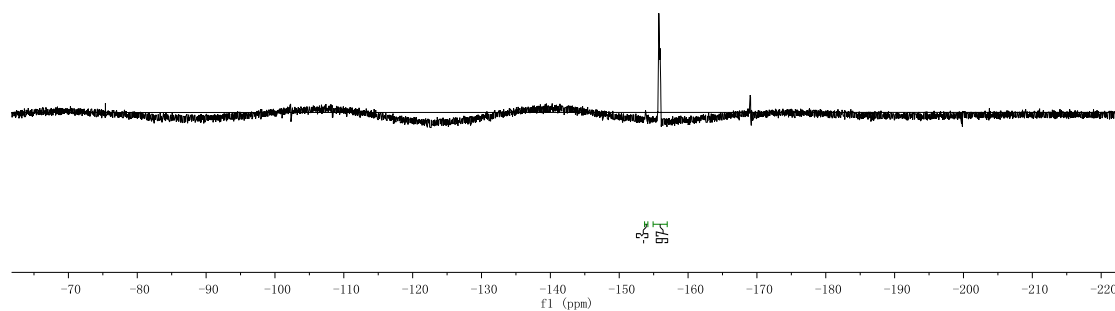

The stereoisomers are at  $\delta$  -154.1 (br),  $\delta$  -155.7 (d,  $J = 34.6$  Hz).

Crude **3k**, d.r. = 89:3:5:3

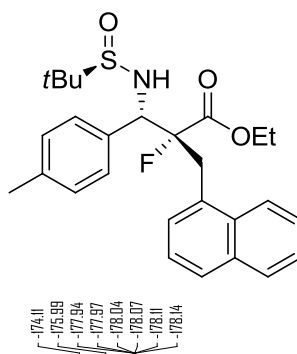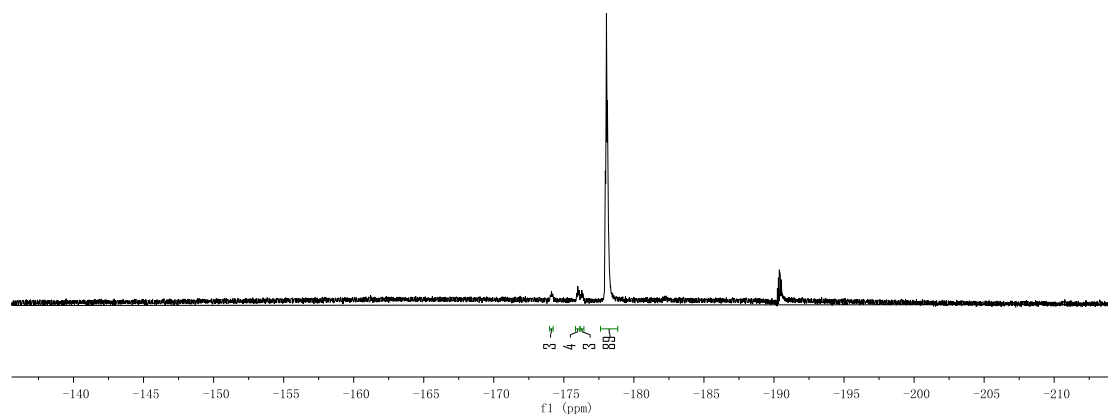

The stereoisomers are at  $\delta$  -174.1 (br),  $\delta$  -175.9 (br),  $\delta$  -176.1 – -176.4 (m),  $\delta$  -177.6 – -178.8 (m).

Crude **31**, d.r. = 66:22:8:4

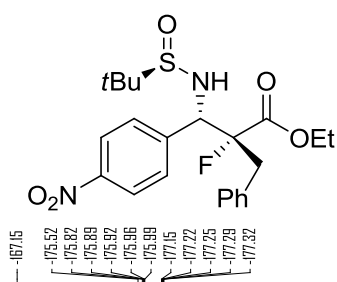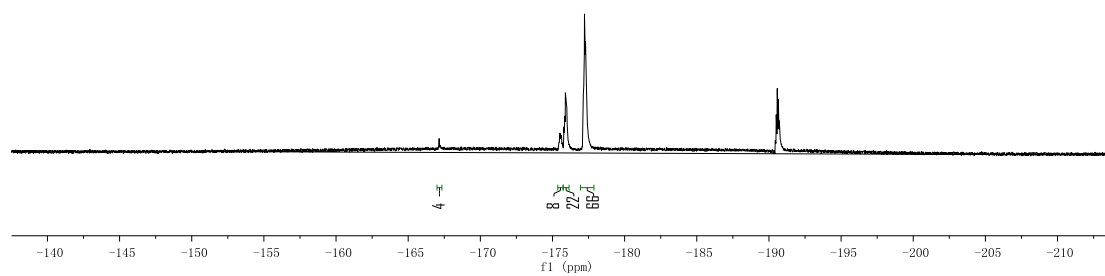

The stereoisomers are at  $\delta$  -167.1 (br),  $\delta$  -175.5 (br),  $\delta$  -175.7 – -176.1 (br),  $\delta$  -176.9 – -177.8 (m).

Crude **3m**, d.r. > 99:1

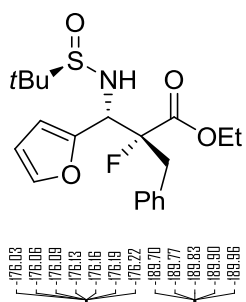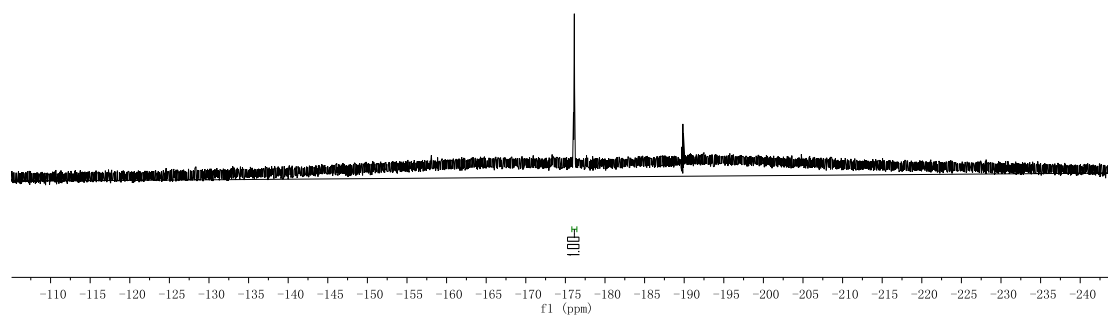

The stereoisomers are at  $\delta$  -175.8 – -176.4 (m).



Crude **3n**, d.r. > 99:1

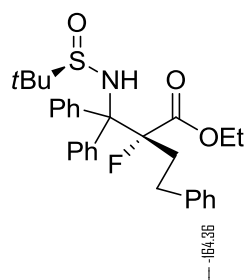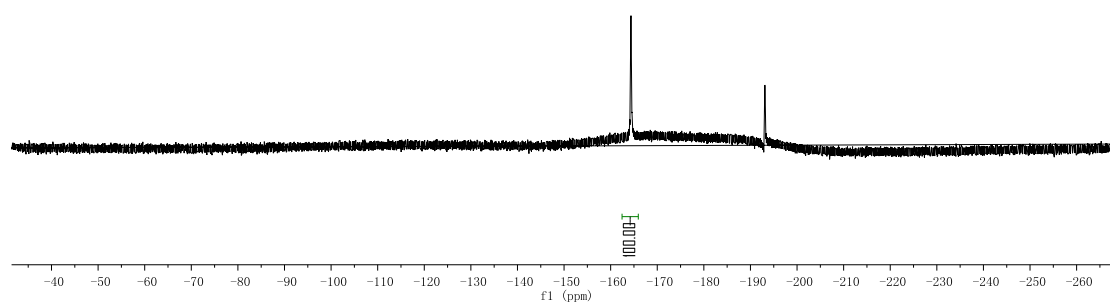

The stereoisomer is at  $\delta$  -164.3 (br).

Crude **5a**, d.r. = 85:6:9

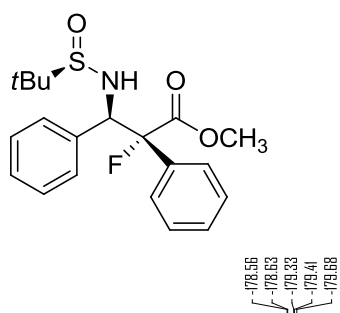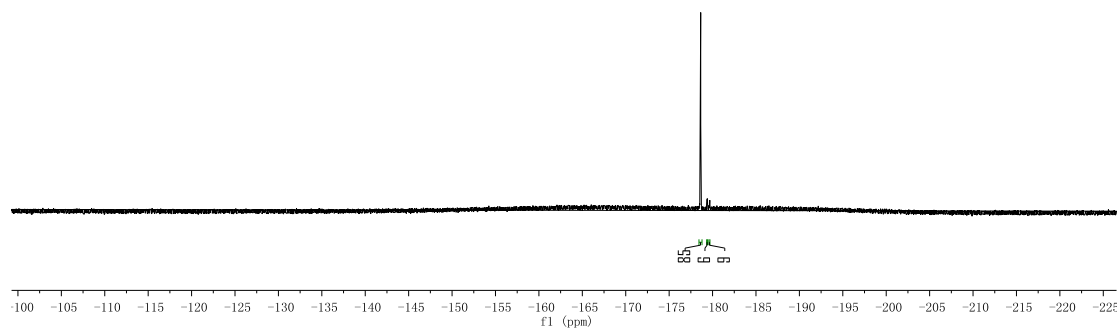

The stereoisomers are at  $\delta$  -178.6 (d,  $J = 25.7$  Hz),  $\delta$  -179.3 (d,  $J = 26.7$  Hz),  $\delta$  -179.6 (br)

Crude **5b**, d.r. = 80:10:10

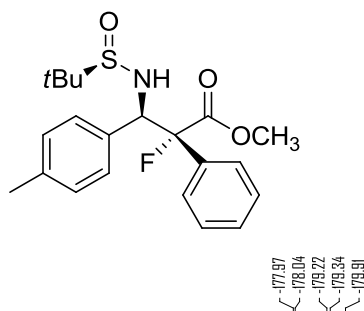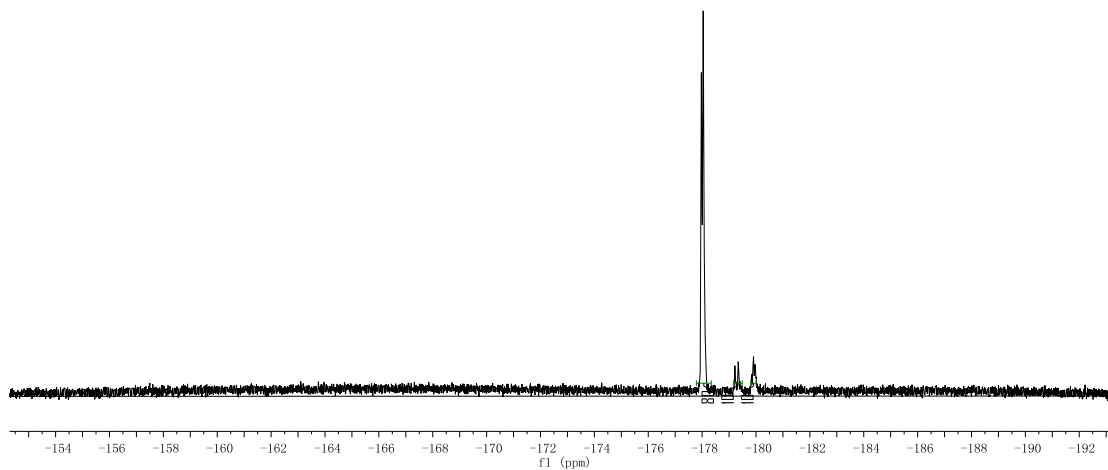

The stereoisomers are at  $\delta$  -178.0 (d,  $J = 26.0$  Hz), -179.2 (d,  $J = 47.0$  Hz), -179.9 (br).

Crude **5c**, d.r. = 92:8

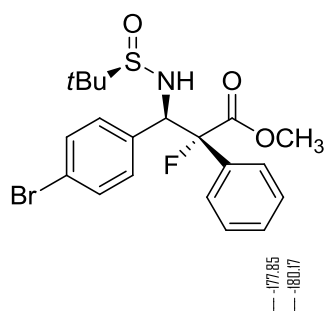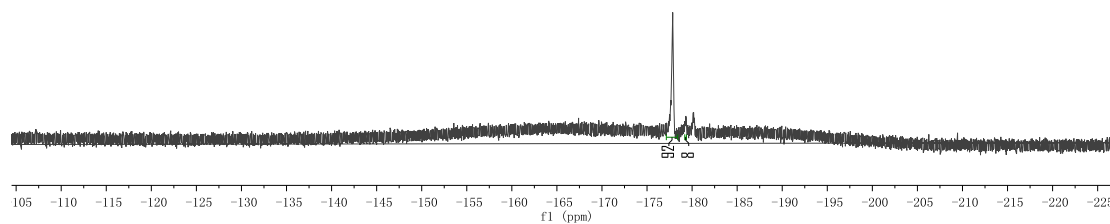

The stereoisomers are at  $\delta$  -177.8 (br), -180.1 (br).

Crude **5d**, d.r. = 80:20

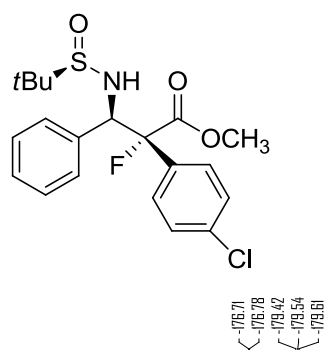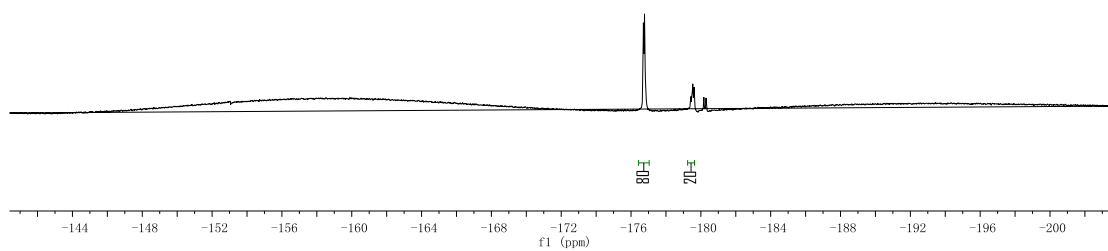

The stereoisomers are at  $\delta$  -176.7 (d,  $J = 24.7$  Hz), -179.5 (t,  $J = 35.8$  Hz).

Crude **5e**, d.r. > 99:1

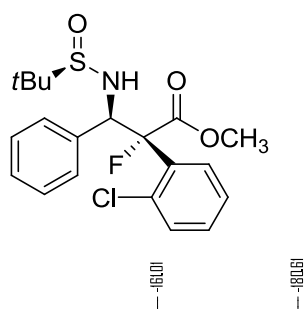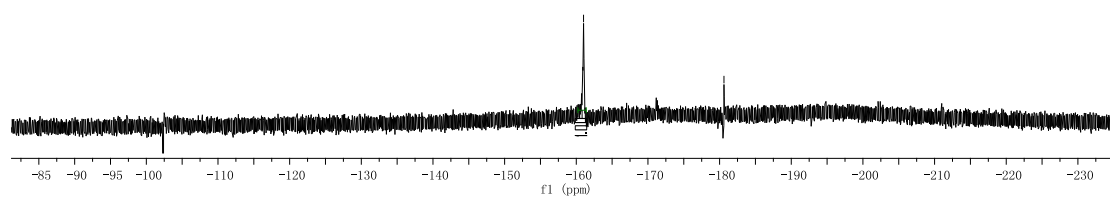

The stereoisomers are at  $\delta$  -161.0 (br).

Crude **5f**, d.r. > 99:1

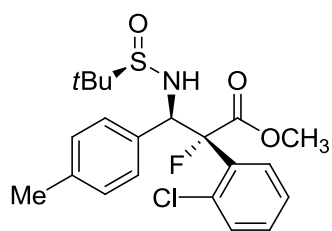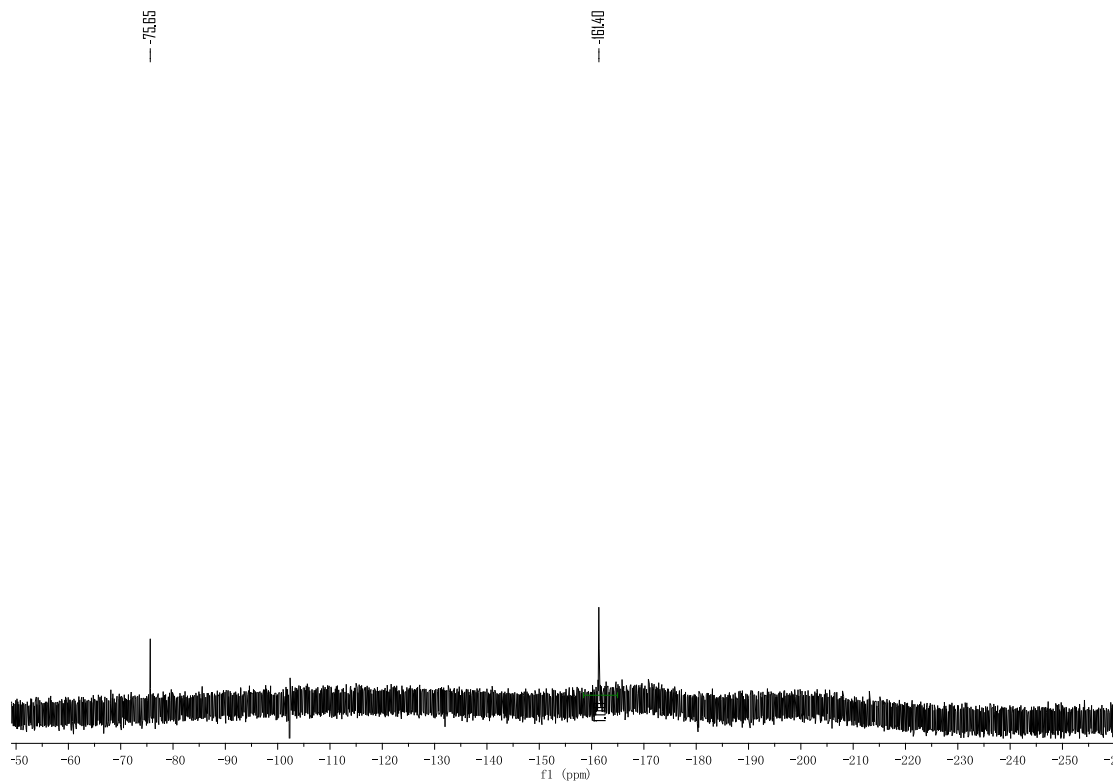

The stereoisomers are at  $\delta -161.40$  (s).

Crude **5g**, d.r. =83:17

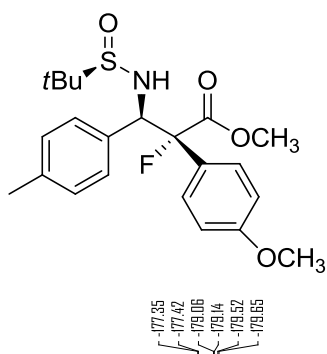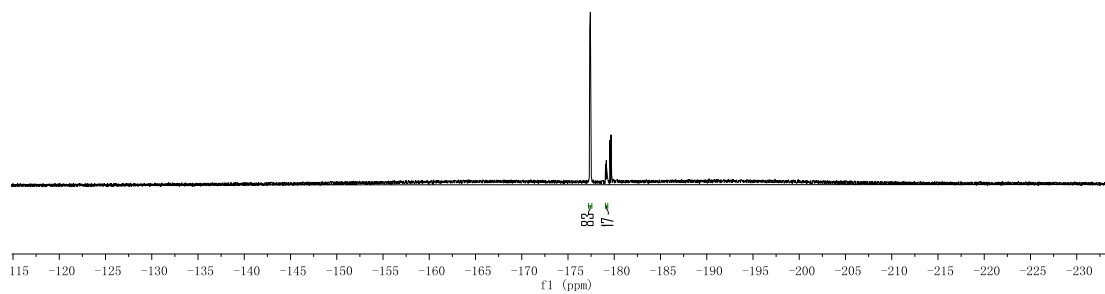

The stereoisomers are at  $\delta$  -177.3 (d,  $J = 26.1$  Hz), -179.1 (d,  $J = 30.0$  Hz).



Crude **5h**, d.r. =85:15

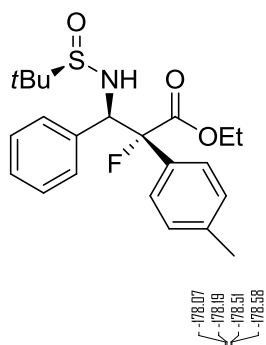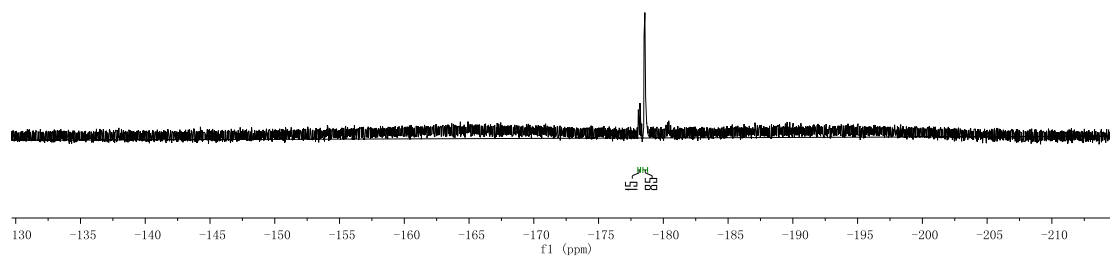

The stereoisomers are at  $\delta$  -178.1 (d,  $J = 47.3$  Hz), -178.5 (d,  $J = 25.3$  Hz).

Crude **5i**, d.r. =96:4

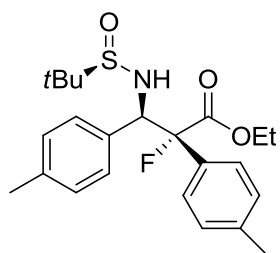

-178.53  
-178.60  
-180.42

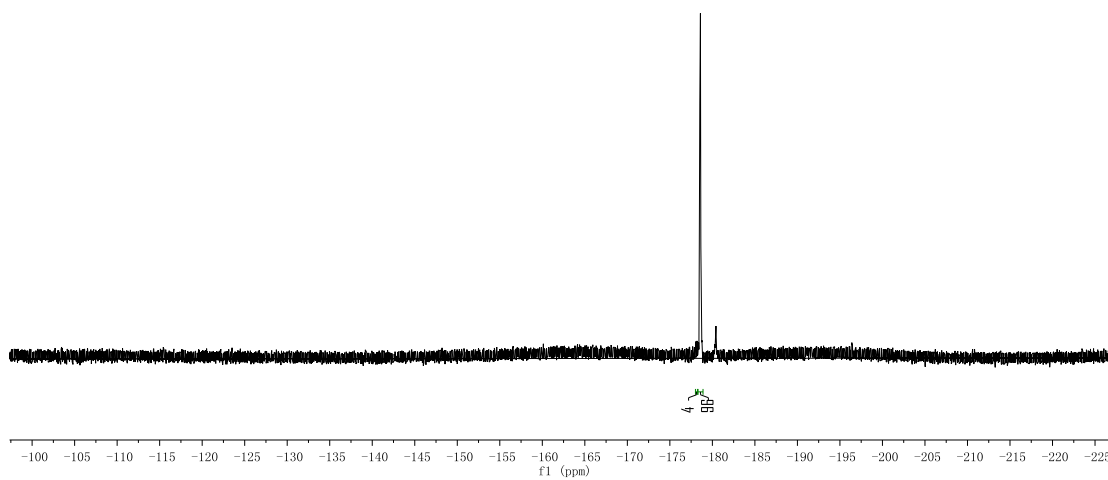

The stereoisomers are at  $\delta$  -178.01 – -178.24 (m), -178.56 (d,  $J = 25.8$  Hz)

Crude **5j**, d.r. =89:11

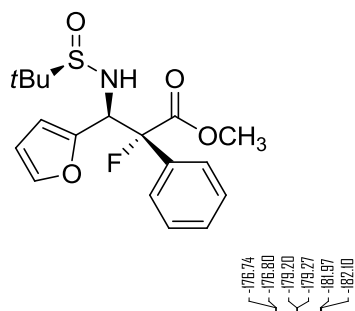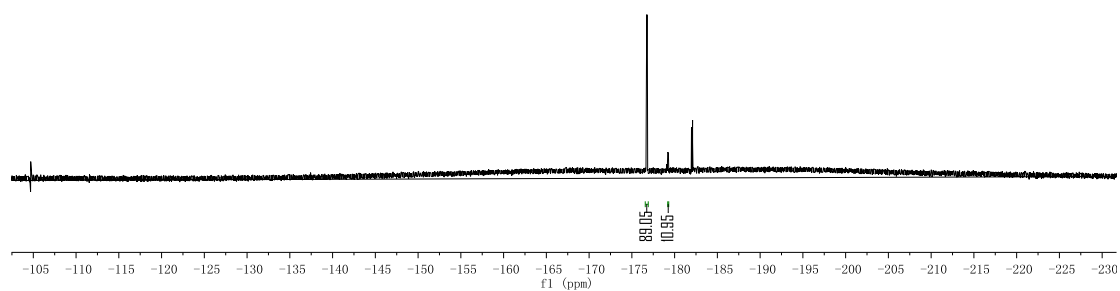

The stereoisomers are at  $\delta$  -176.7 (d,  $J = 25.8$  Hz), -179.2 (d,  $J = 27.7$  Hz).

Crude **5k**, d.r. =97:1:2

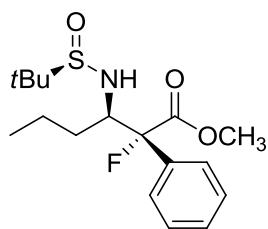

175.18  
179.22  
179.34  
181.50  
182.07

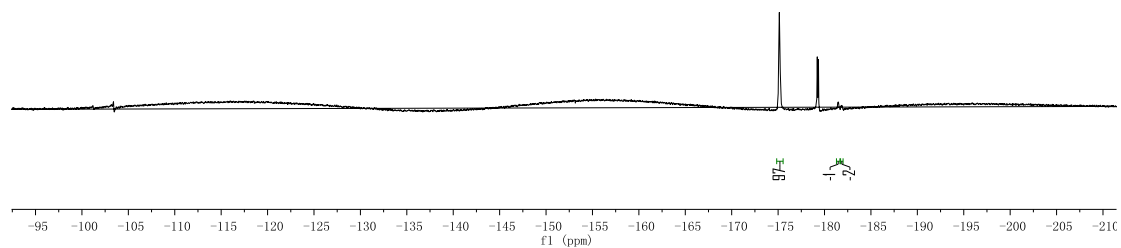

The stereoisomers are at  $\delta$  -175.1 (br), -181.5 (br), -181.7 – -182.0 (m).

Crude **7a**, d.r. =60:28:12

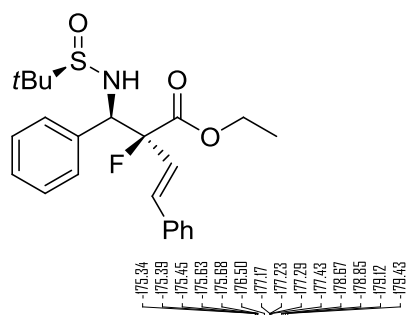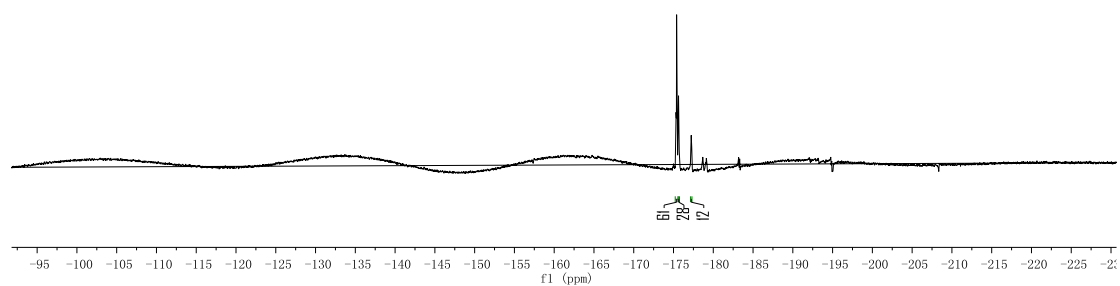

The stereoisomers are at  $\delta$  -175.3 (t,  $J = 20.9$  Hz), -175.6 (d,  $J = 19.5$  Hz), -177.2 (t,  $J = 22.7$  Hz).

Crude **7b**, d.r. =79:21

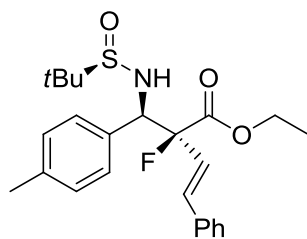

-171.03  
-172.68

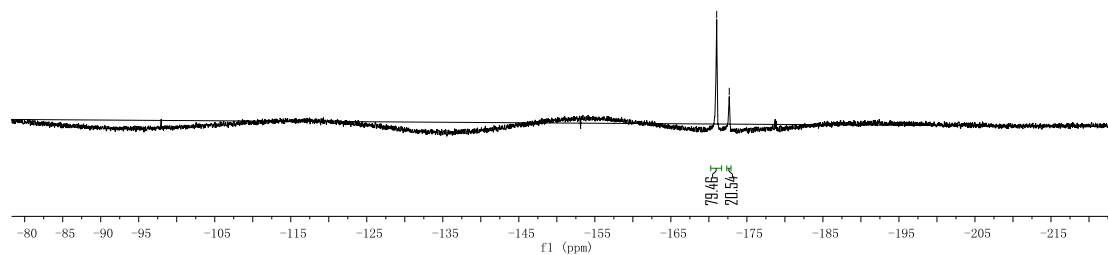

The stereoisomers are at  $\delta$  -171.0 (br), -172.6 (br).

## NMR Spectra for All New Compounds

$^1\text{H}$  NMR (400 MHz,  $\text{CDCl}_3$ ) spectrum of **3a**

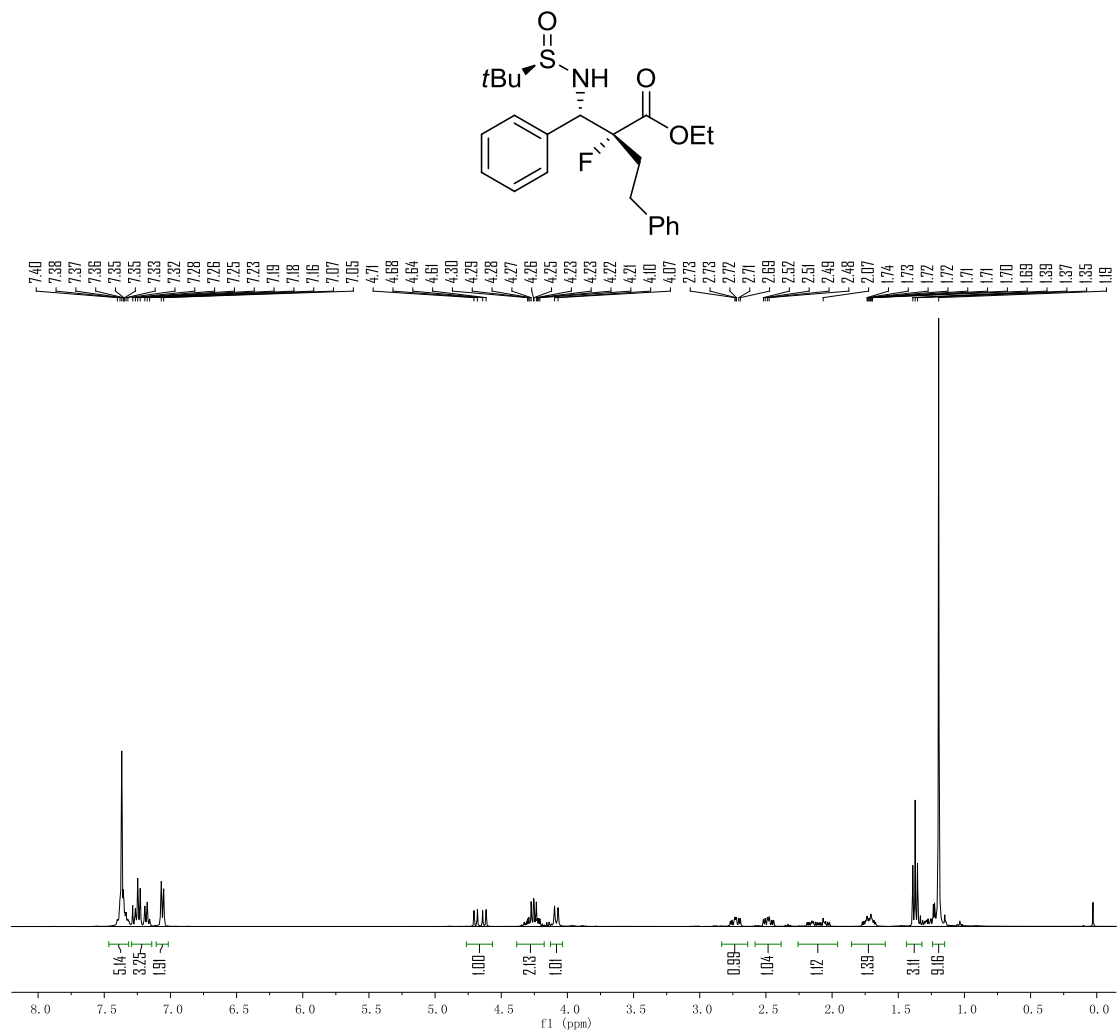

$^{19}\text{F}$  NMR (376 MHz,  $\text{CDCl}_3$ ) spectrum of **3a**

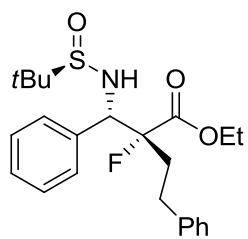

179.39  
179.41  
179.46  
179.48  
179.51  
179.55  
179.57

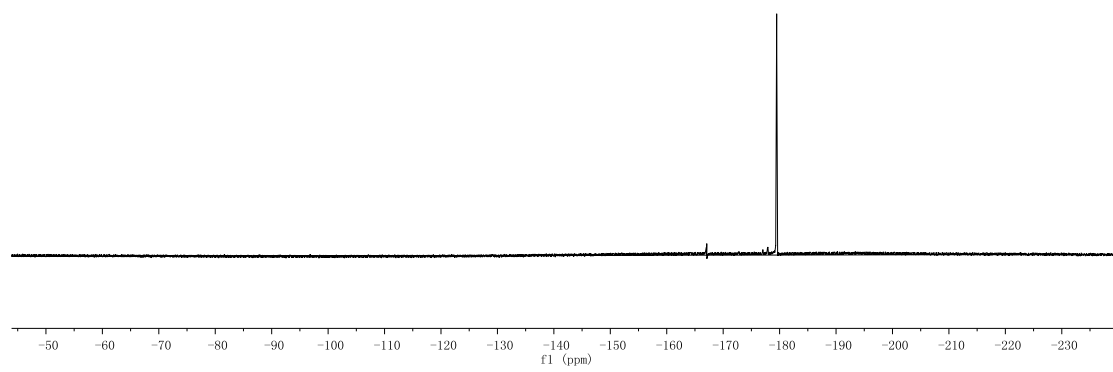



<sup>13</sup>C NMR (101 MHz, CDCl<sub>3</sub>) spectrum of **3a**

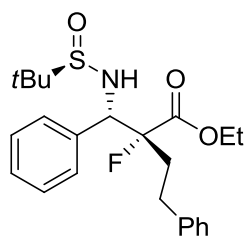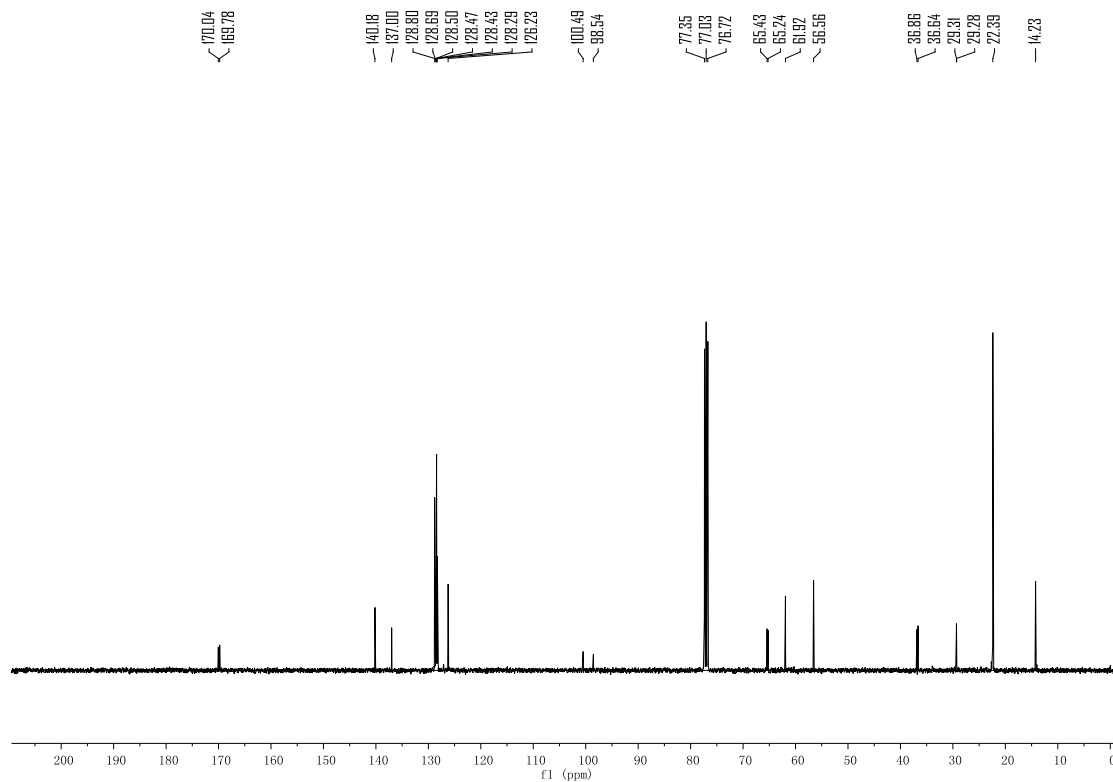

$^1\text{H}$  NMR (400 MHz,  $\text{CDCl}_3$ ) spectrum of **3b**

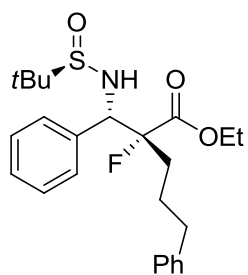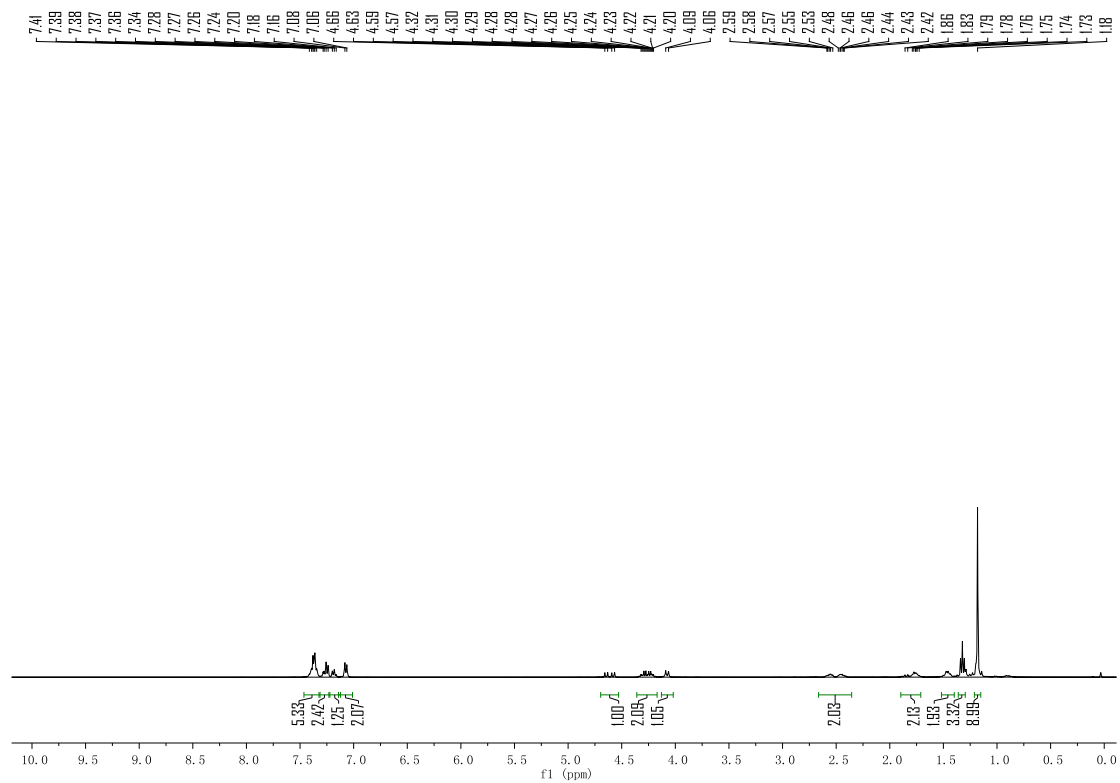

$^{19}\text{F}$  NMR (376 MHz,  $\text{CDCl}_3$ ) spectrum of **3b**

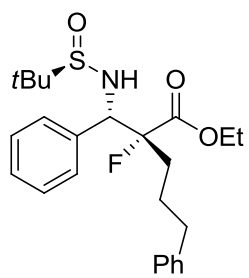

$-178.56$   
 $-178.63$   
 $-178.72$

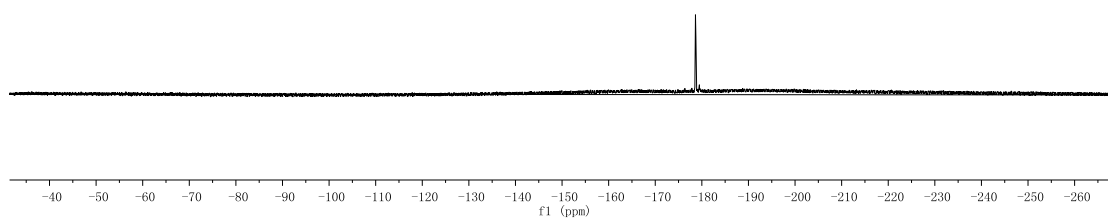

$^{13}\text{C}$  NMR (101 MHz,  $\text{CDCl}_3$ ) spectrum of **3b**

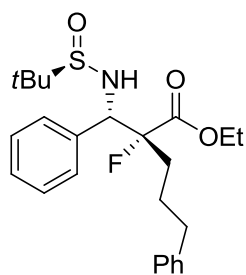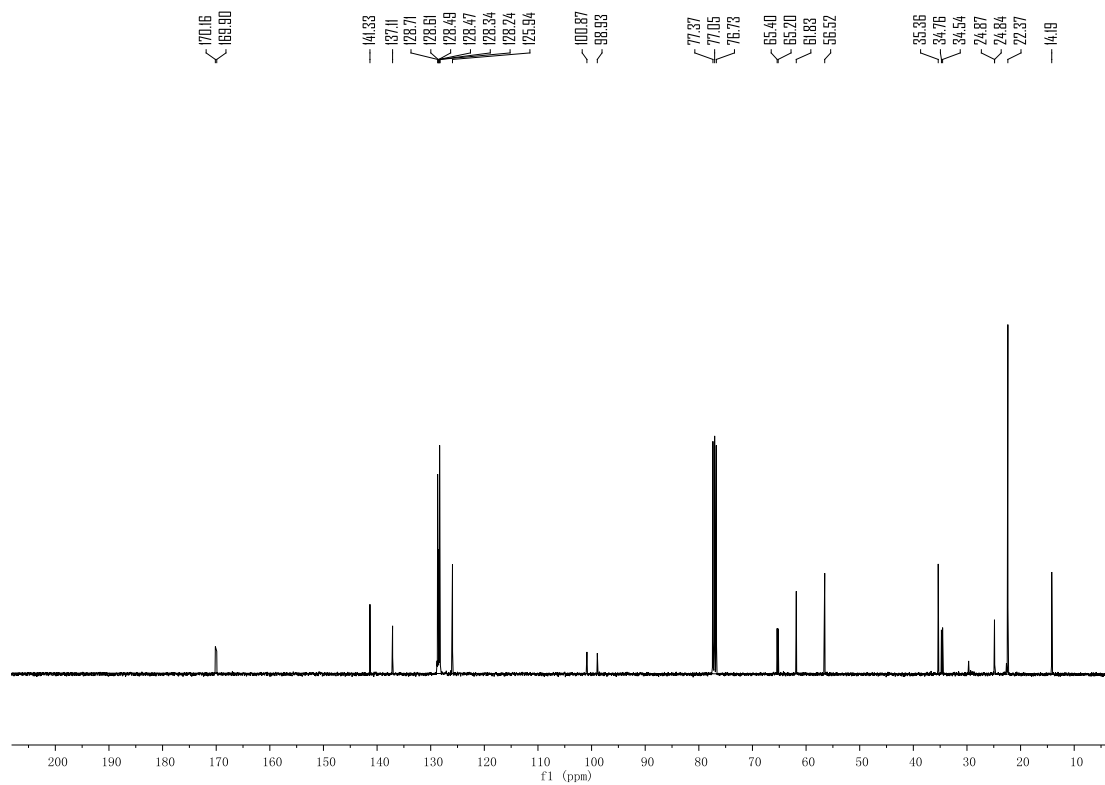

$^1\text{H}$  NMR (400 MHz,  $\text{CDCl}_3$ ) spectrum of **3c**

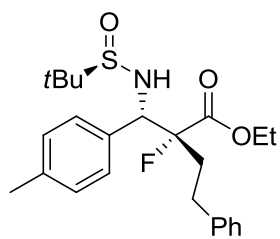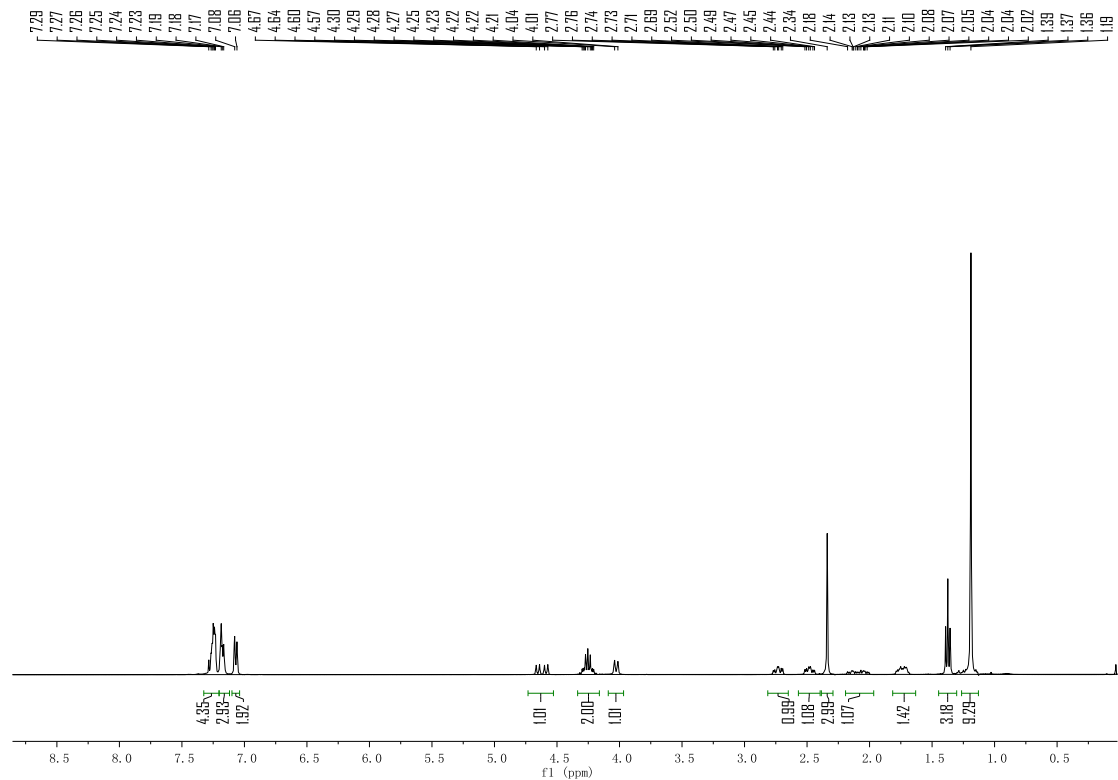

$^{19}\text{F}$  NMR (376 MHz,  $\text{CDCl}_3$ ) spectrum of **3c**

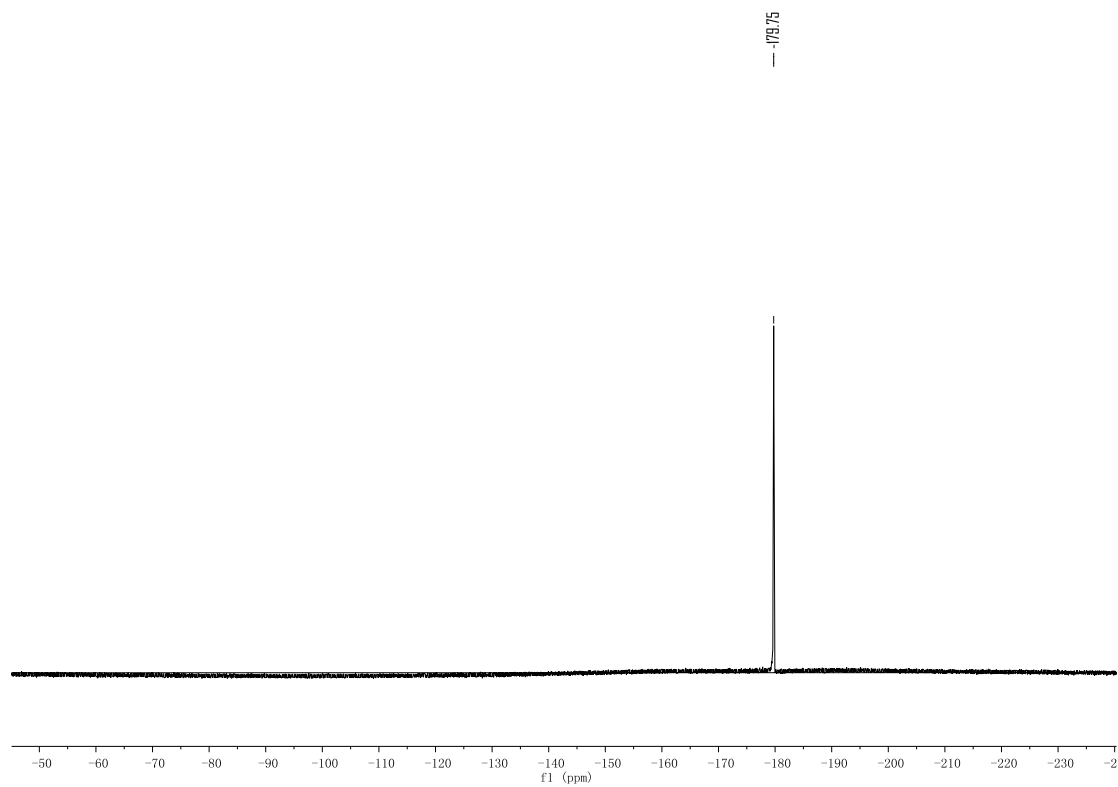

<sup>13</sup>C NMR (101 MHz, CDCl<sub>3</sub>) spectrum of **3c**

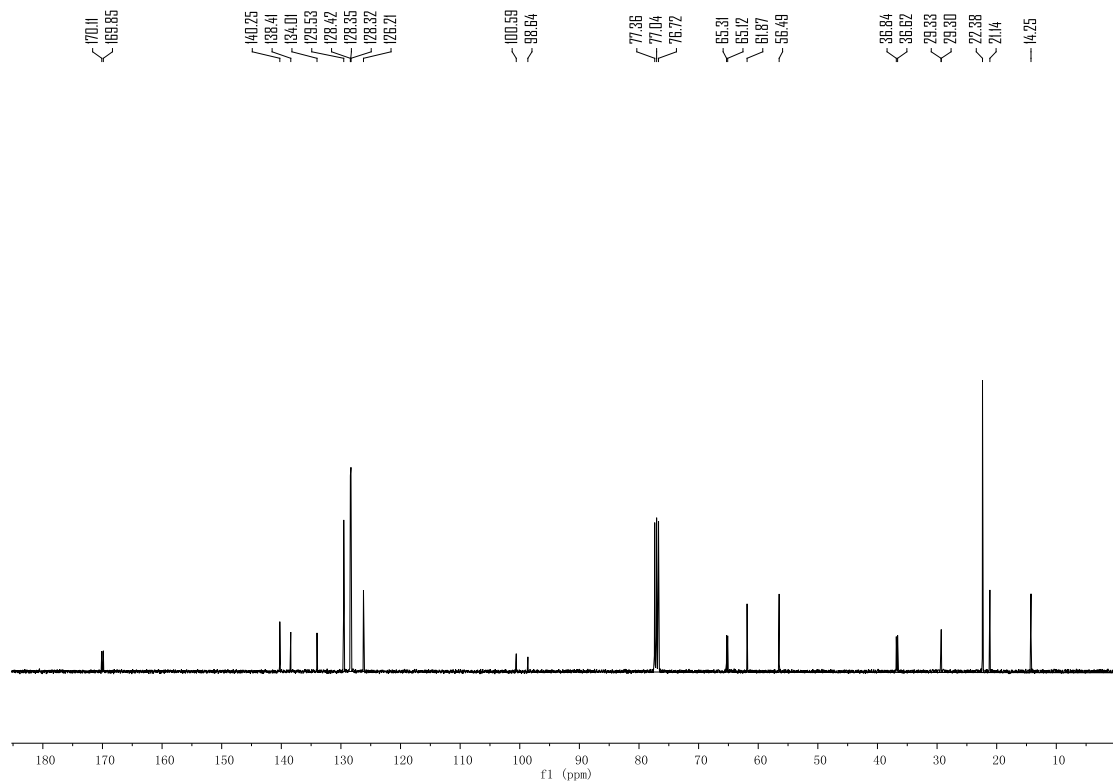

$^1\text{H}$  NMR (400 MHz,  $\text{CDCl}_3$ ) spectrum of **3d**

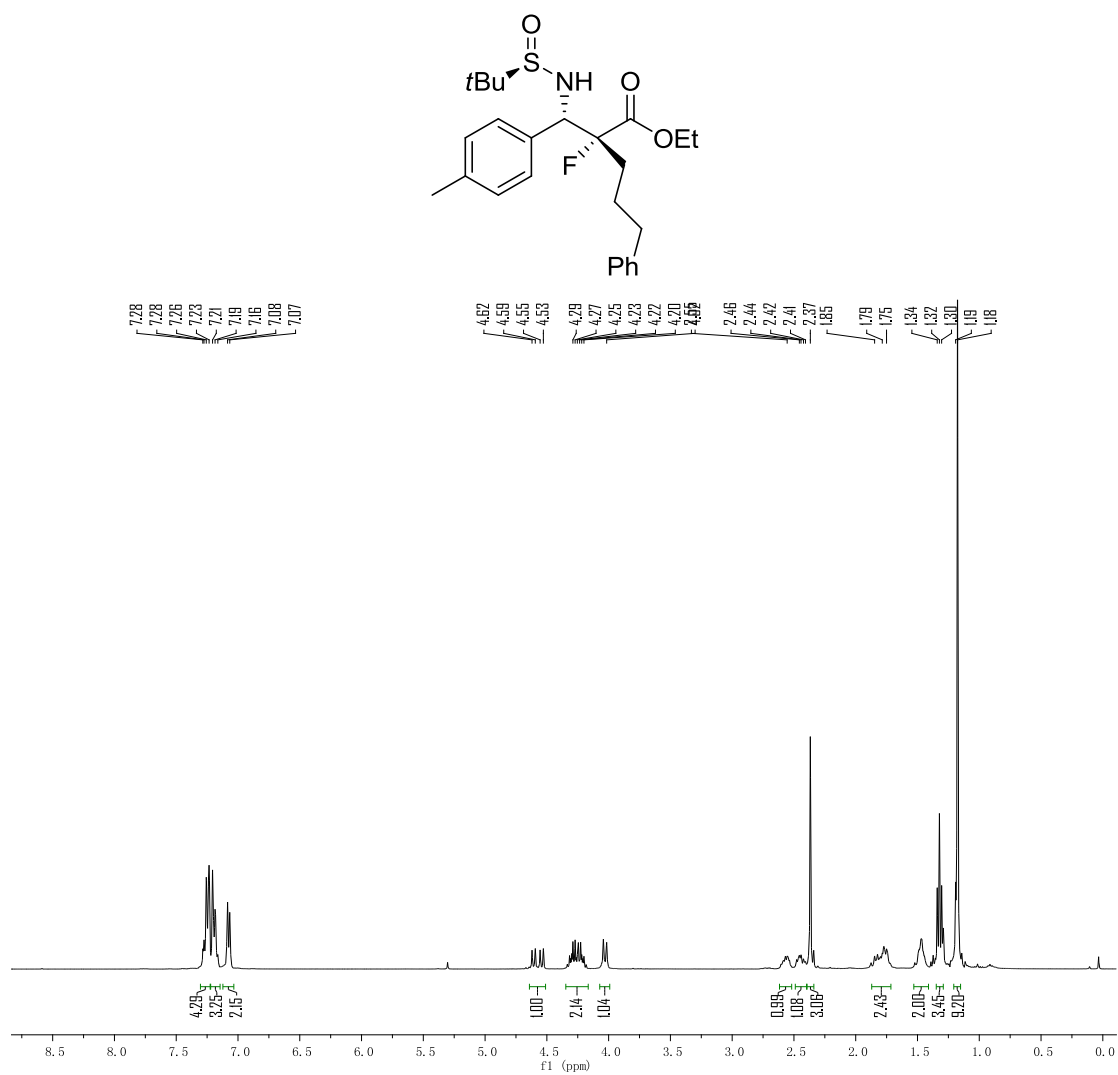



$^{19}\text{F}$  NMR (376 MHz,  $\text{CDCl}_3$ ) spectrum of **3d**

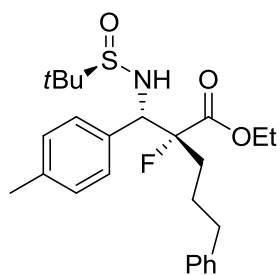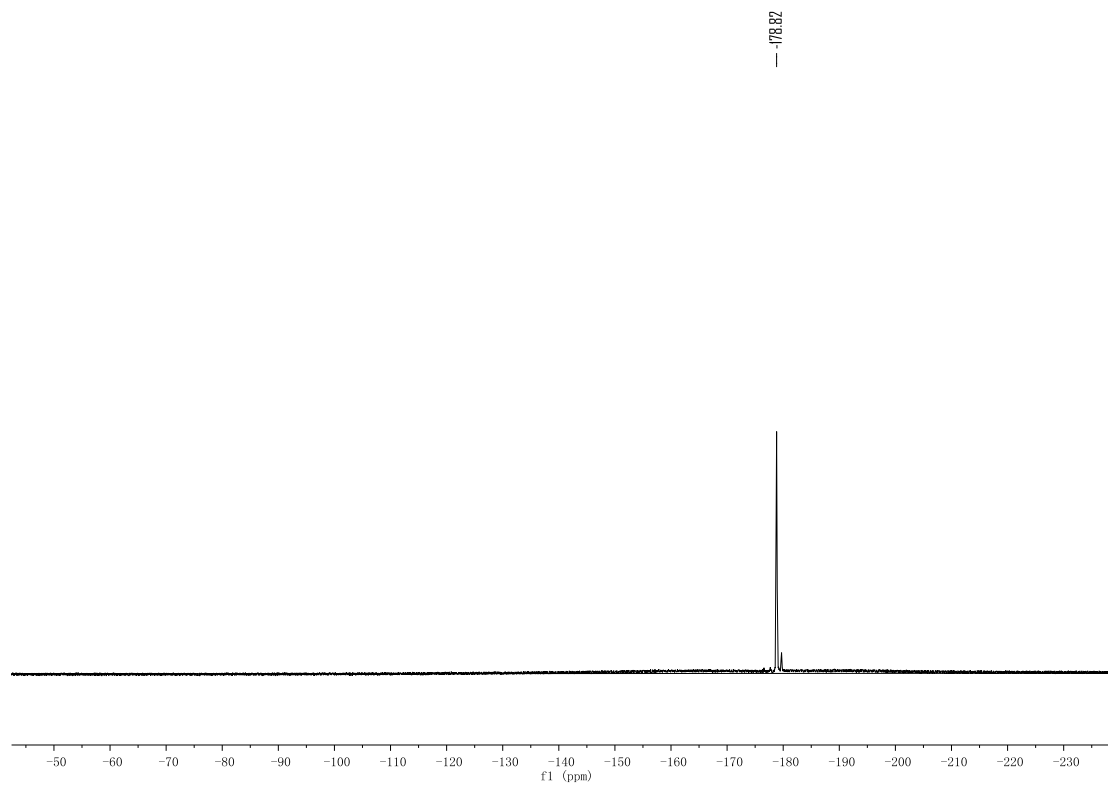

$^{13}\text{C}$  NMR (101 MHz,  $\text{CDCl}_3$ ) spectrum of **3d**

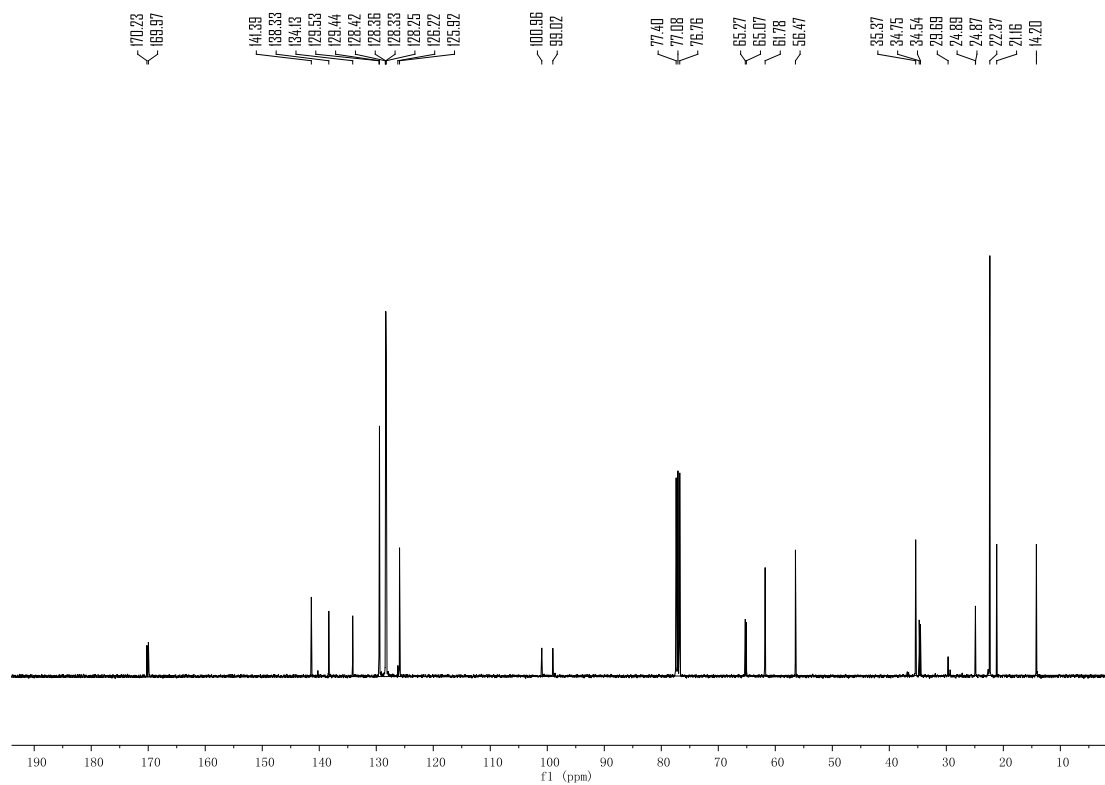

$^1\text{H}$  NMR (400 MHz,  $\text{CDCl}_3$ ) spectrum of **3e**

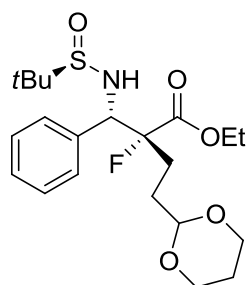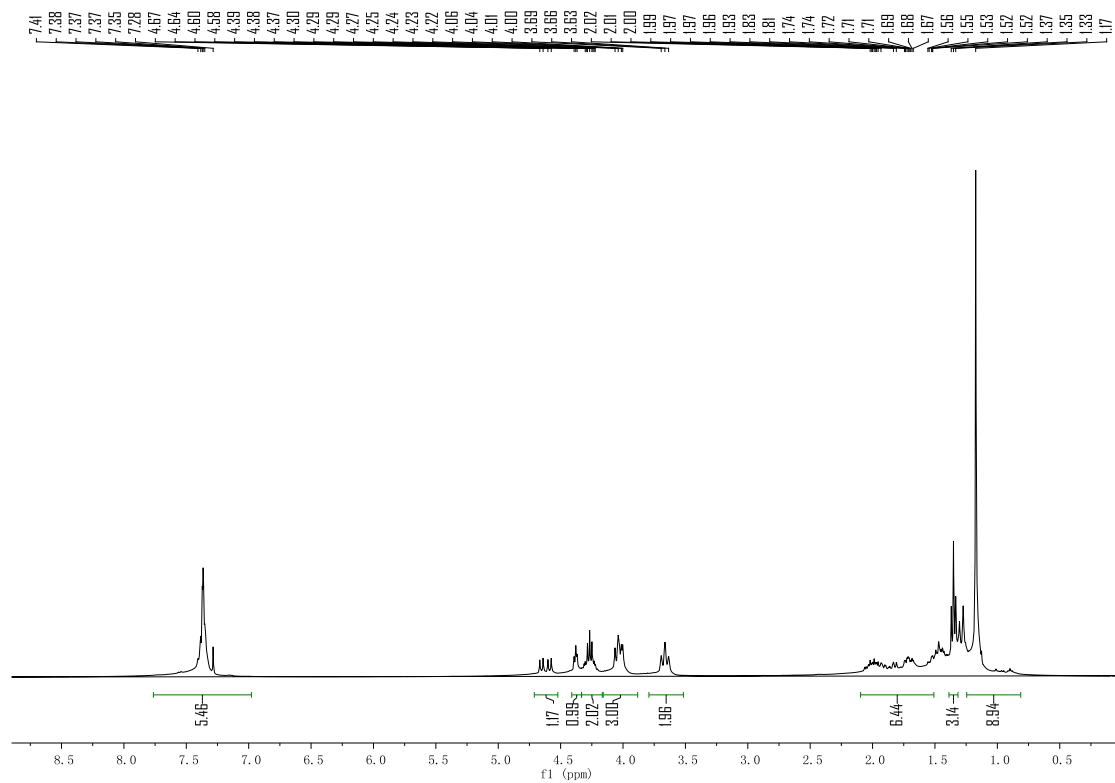

$^{19}\text{F}$  NMR (376 MHz,  $\text{CDCl}_3$ ) spectrum of **3e**

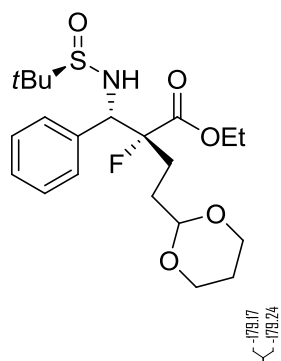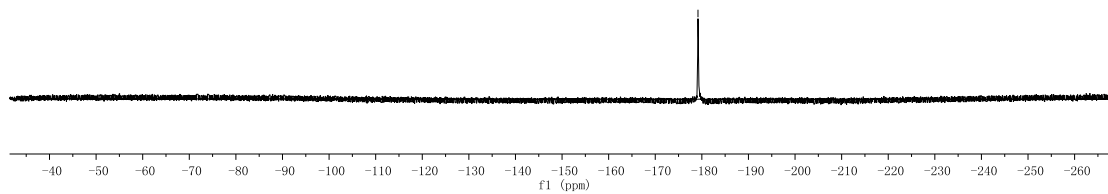

$^{13}\text{C}$  NMR (101 MHz,  $\text{CDCl}_3$ ) spectrum of **3e**

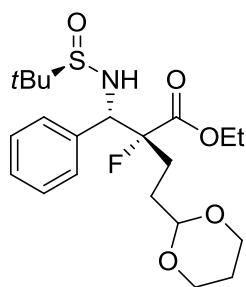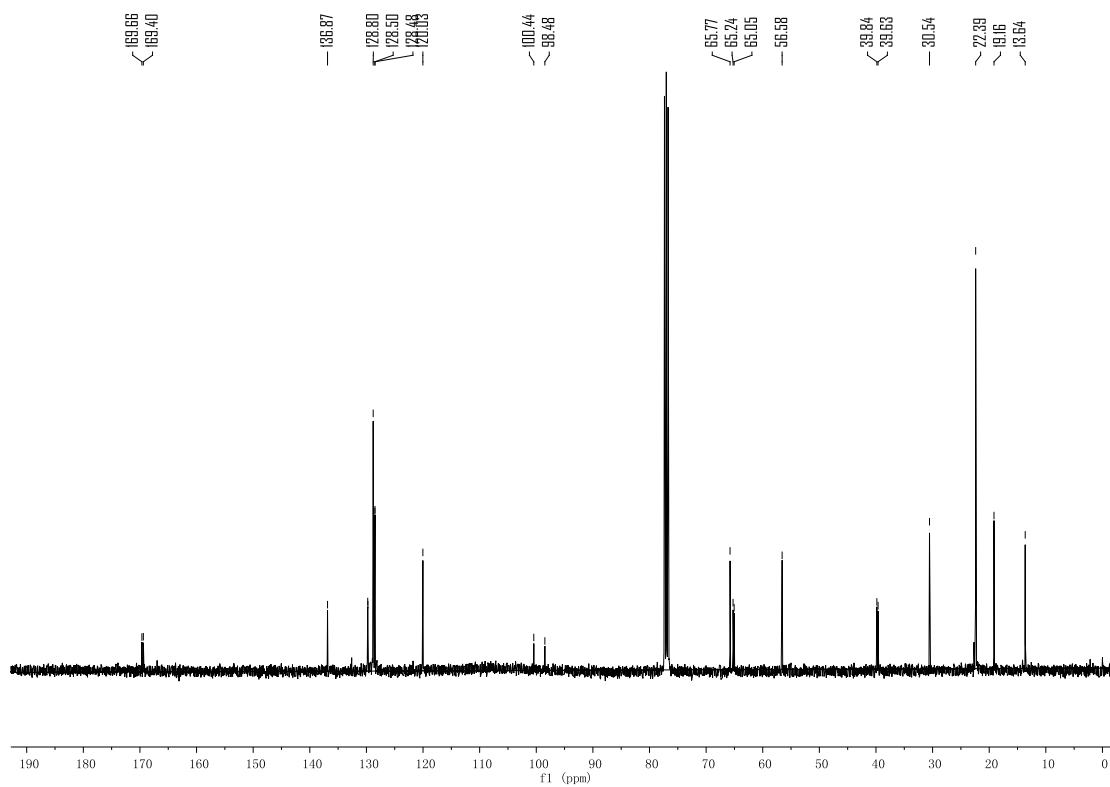

$^1\text{H}$  NMR (400 MHz,  $\text{CDCl}_3$ ) spectrum of **3f**

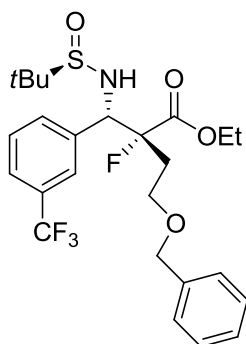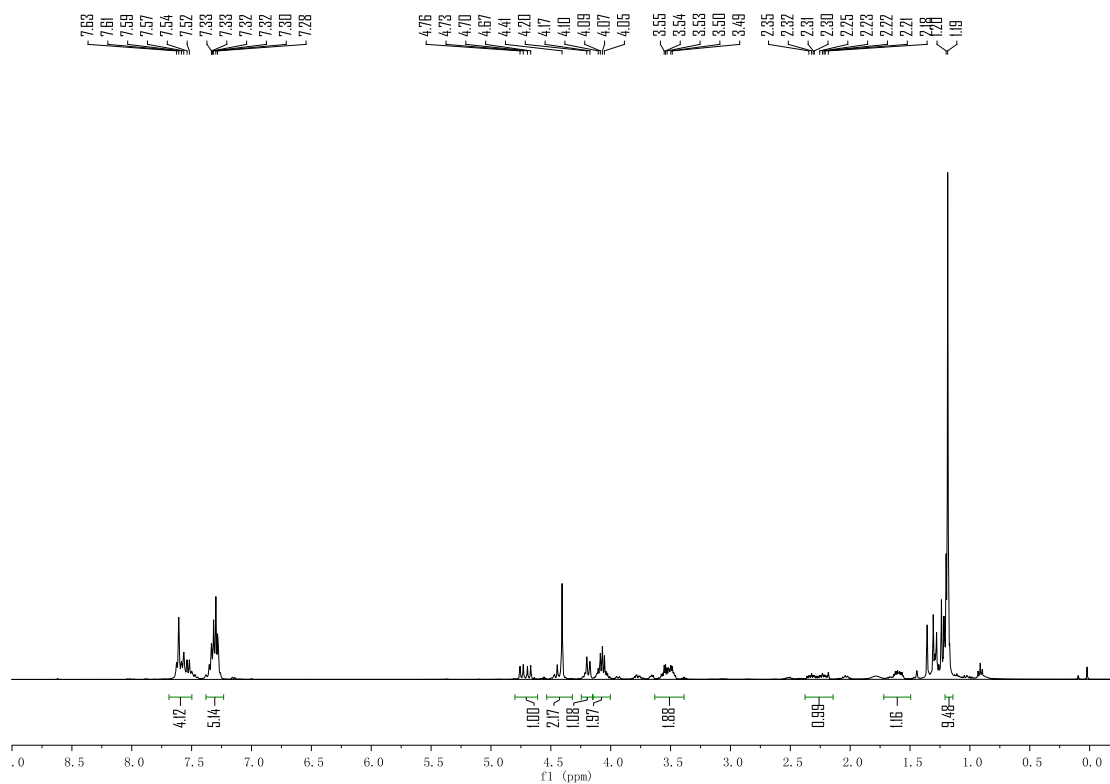

$^{19}\text{F}$  NMR (376 MHz,  $\text{CDCl}_3$ ) spectrum of **3f**

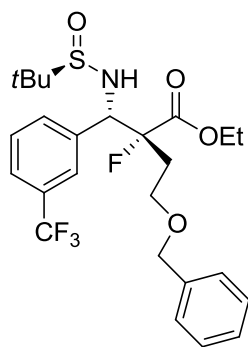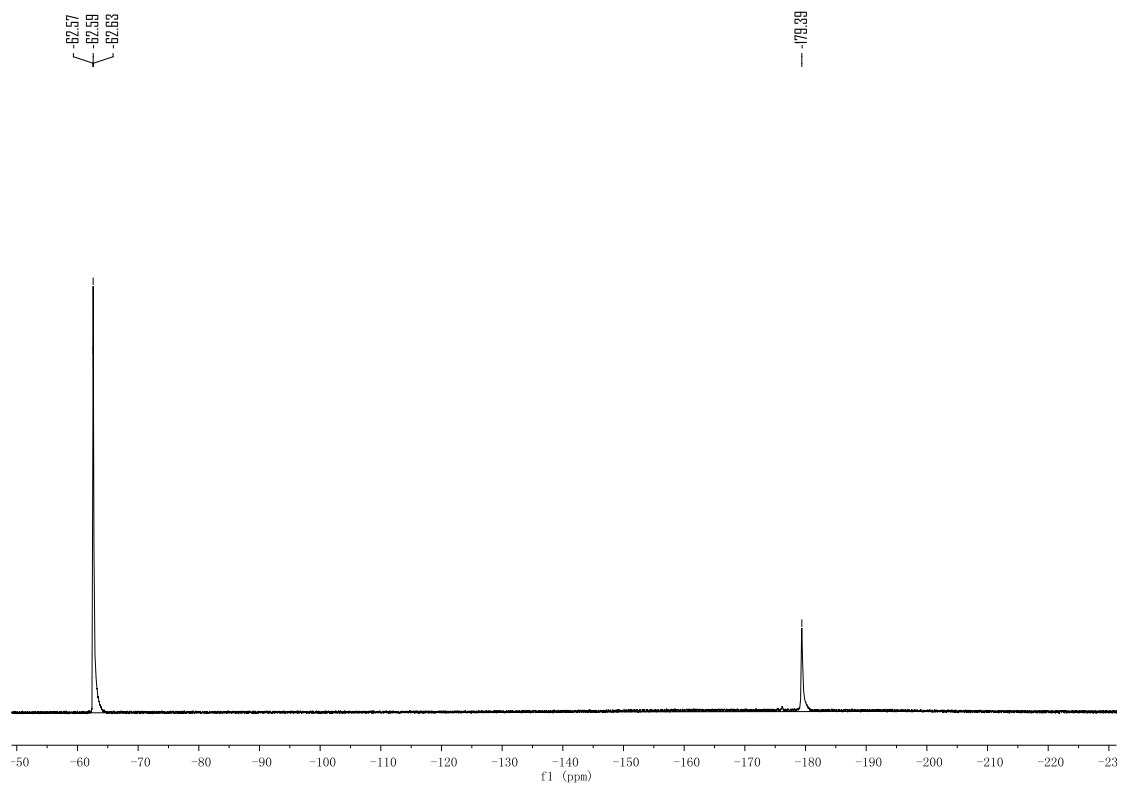

$^{13}\text{C}$  NMR (101 MHz,  $\text{CDCl}_3$ ) spectrum of **3f**

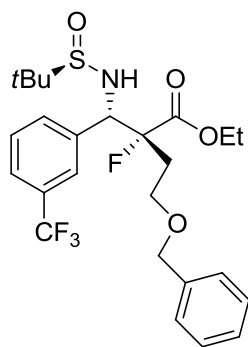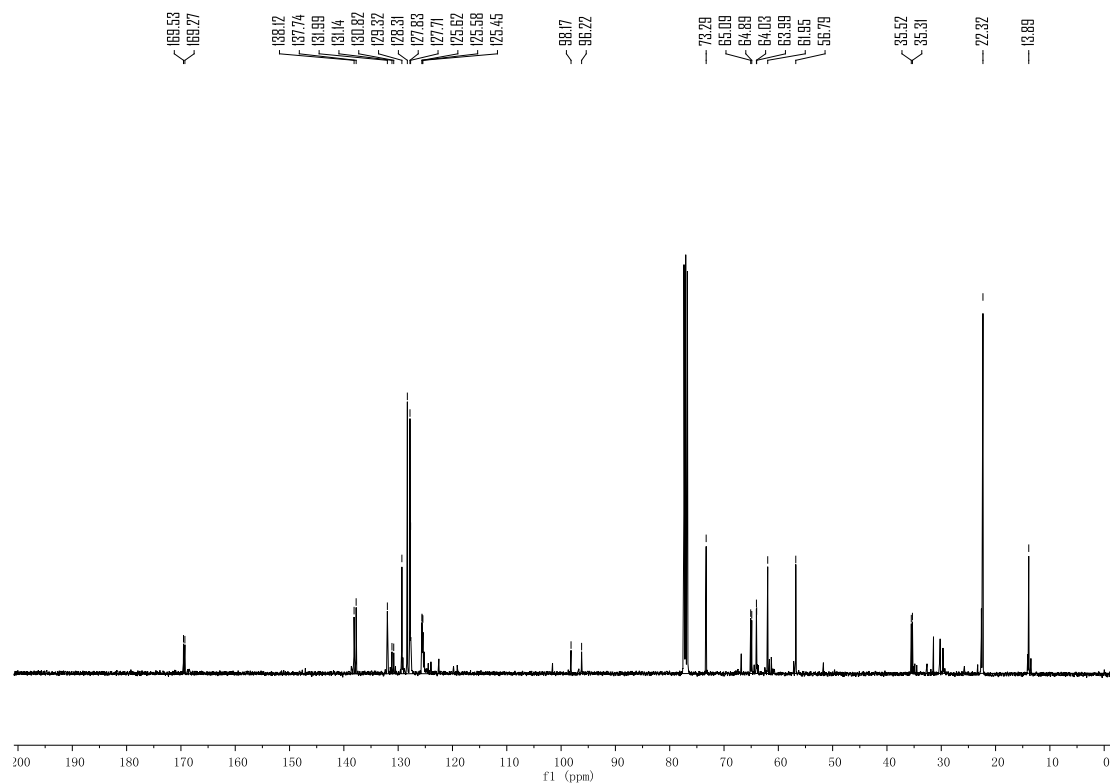



$^1\text{H}$  NMR (400 MHz,  $\text{CDCl}_3$ ) spectrum of **3g**

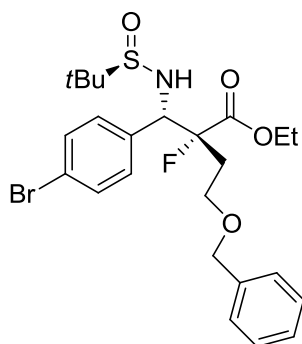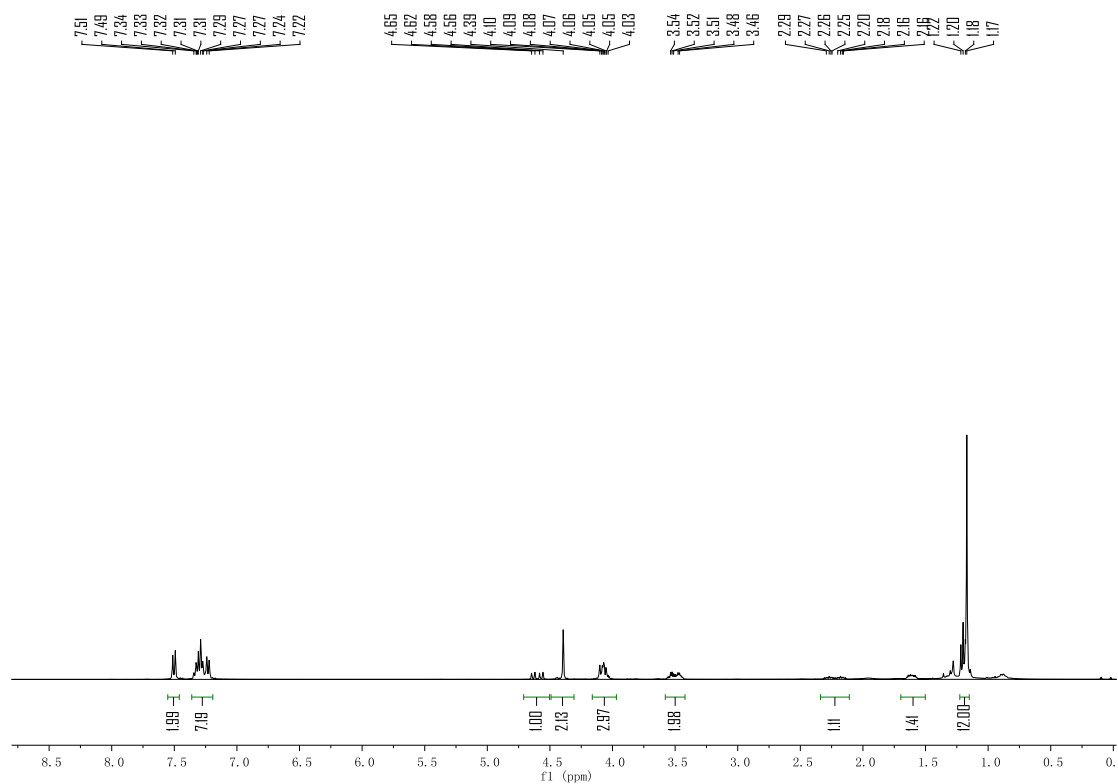

$^{19}\text{F}$  NMR (376 MHz,  $\text{CDCl}_3$ ) spectrum of **3g**

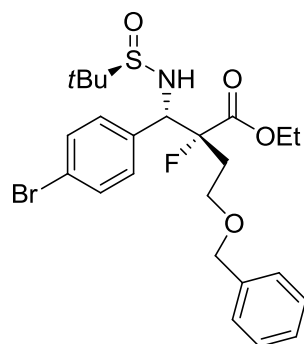

180.05  
180.13  
180.20

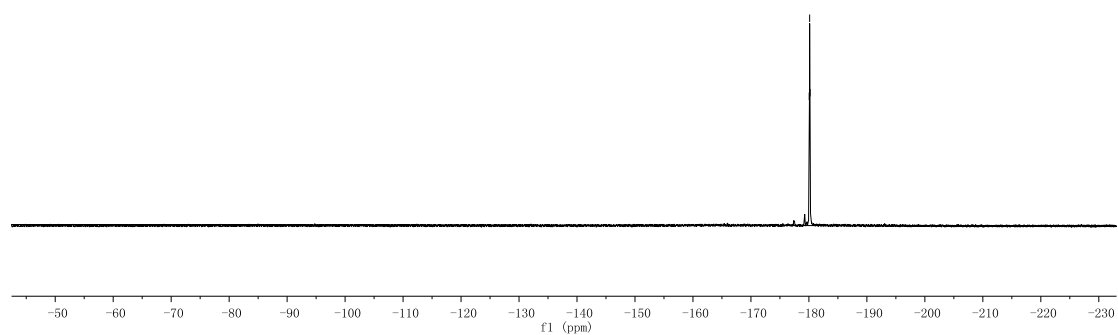

$^{13}\text{C}$  NMR (101 MHz,  $\text{CDCl}_3$ ) spectrum of **3g**

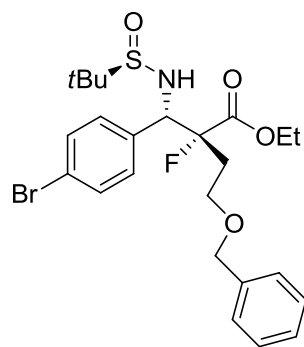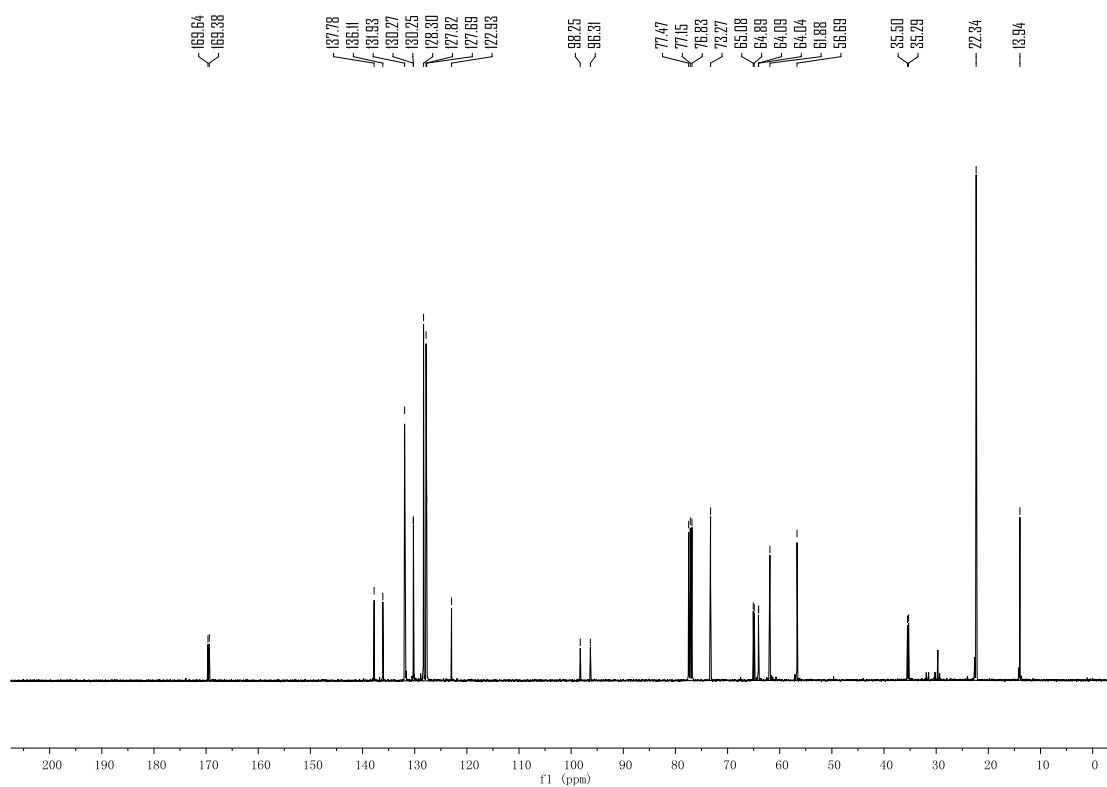

$^1\text{H}$  NMR (400 MHz,  $\text{CDCl}_3$ ) spectrum of **3h**

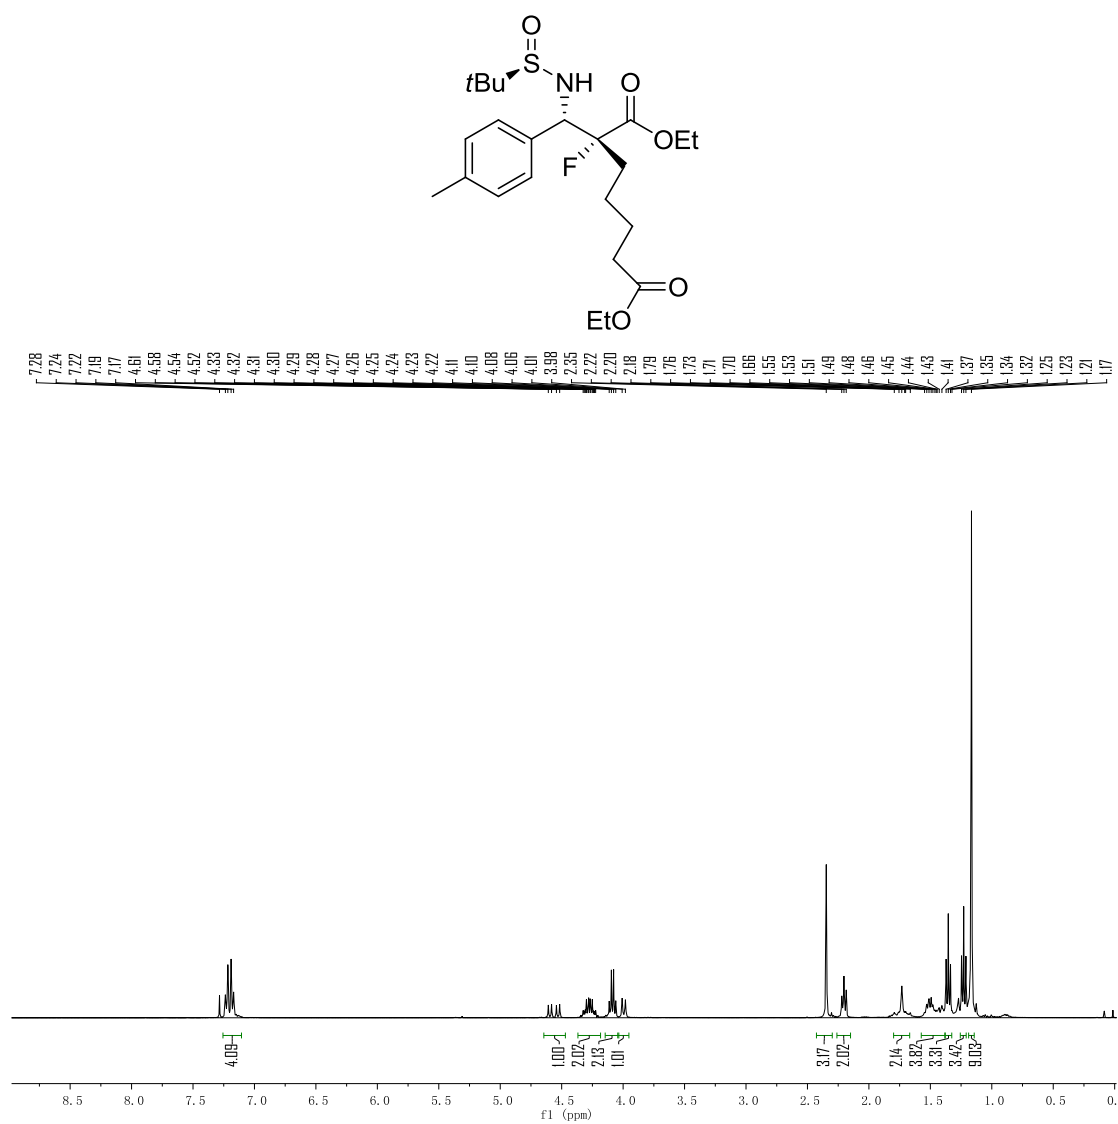

$^{19}\text{F}$  NMR (376 MHz,  $\text{CDCl}_3$ ) spectrum of **3h**

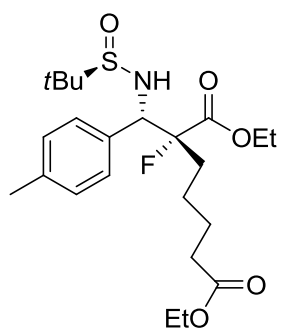

-179.80  
-179.87  
-179.87  
-179.89  
-179.92  
-179.96

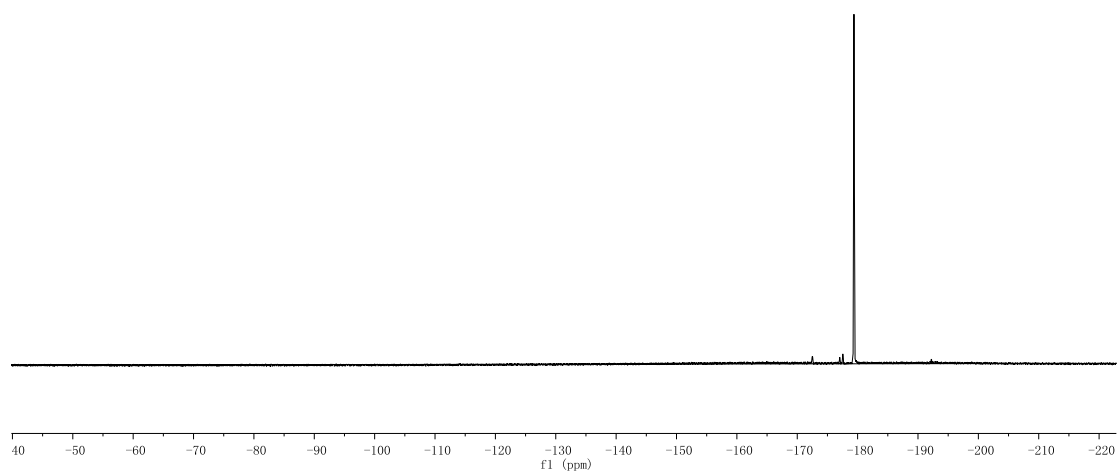

$^{13}\text{C}$  NMR (101 MHz,  $\text{CDCl}_3$ ) spectrum of **3h**

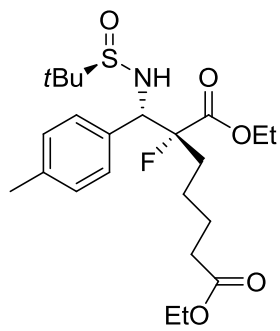

173.16  
170.19  
169.53  
138.59  
134.16  
129.48  
128.53  
128.31  
100.87  
98.93  
77.35  
77.03  
76.72  
65.30  
65.11  
61.83  
60.25  
56.46  
34.85  
34.63  
33.93  
24.58  
22.86  
22.63  
22.36  
21.15  
14.21  
14.18

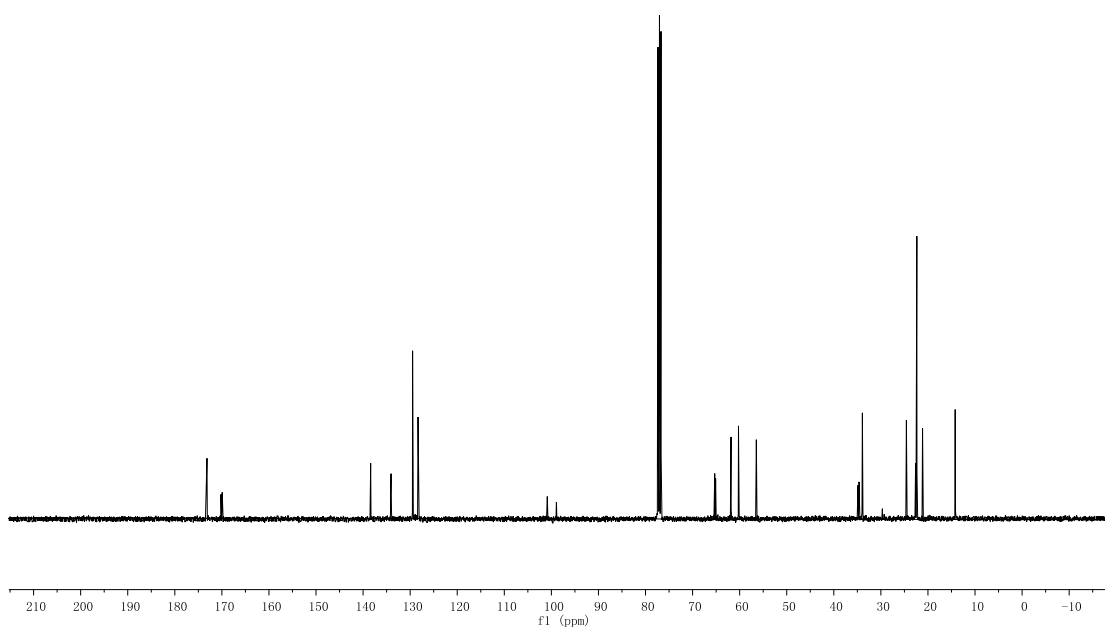

$^1\text{H}$  NMR (400 MHz,  $\text{CDCl}_3$ ) spectrum of **3i**

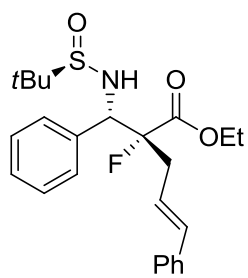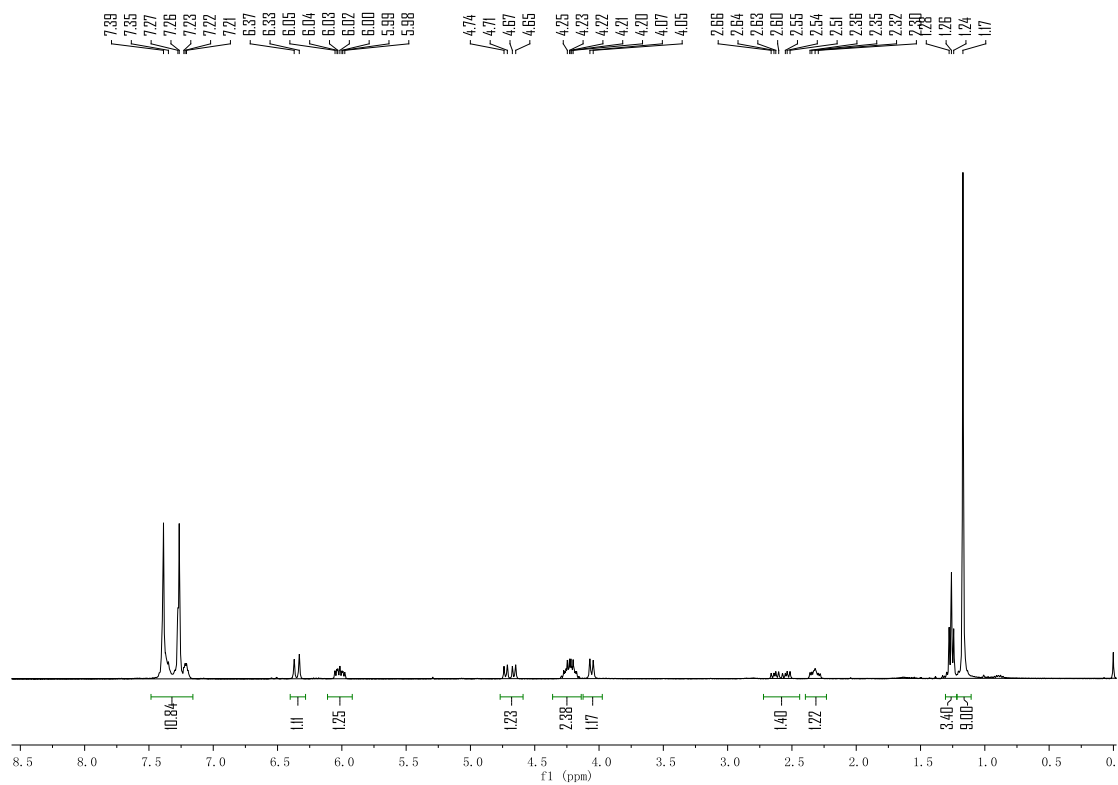

$^{19}\text{F}$  NMR (376 MHz,  $\text{CDCl}_3$ ) spectrum of **3i**

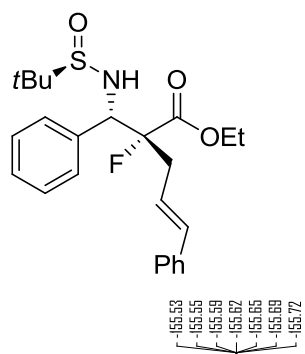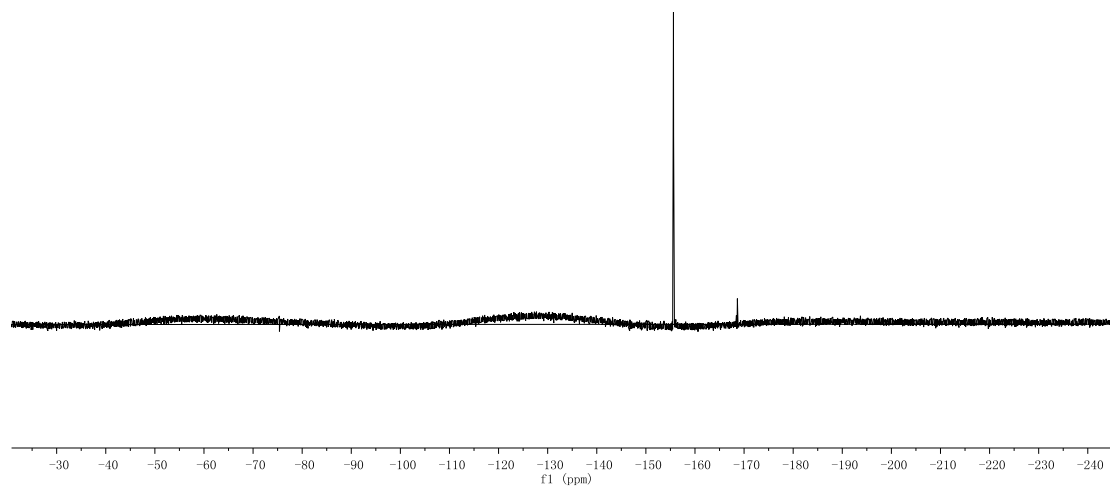



$^{13}\text{C}$  NMR (101 MHz,  $\text{CDCl}_3$ ) spectrum of **3i**

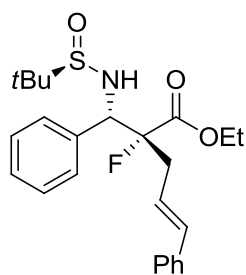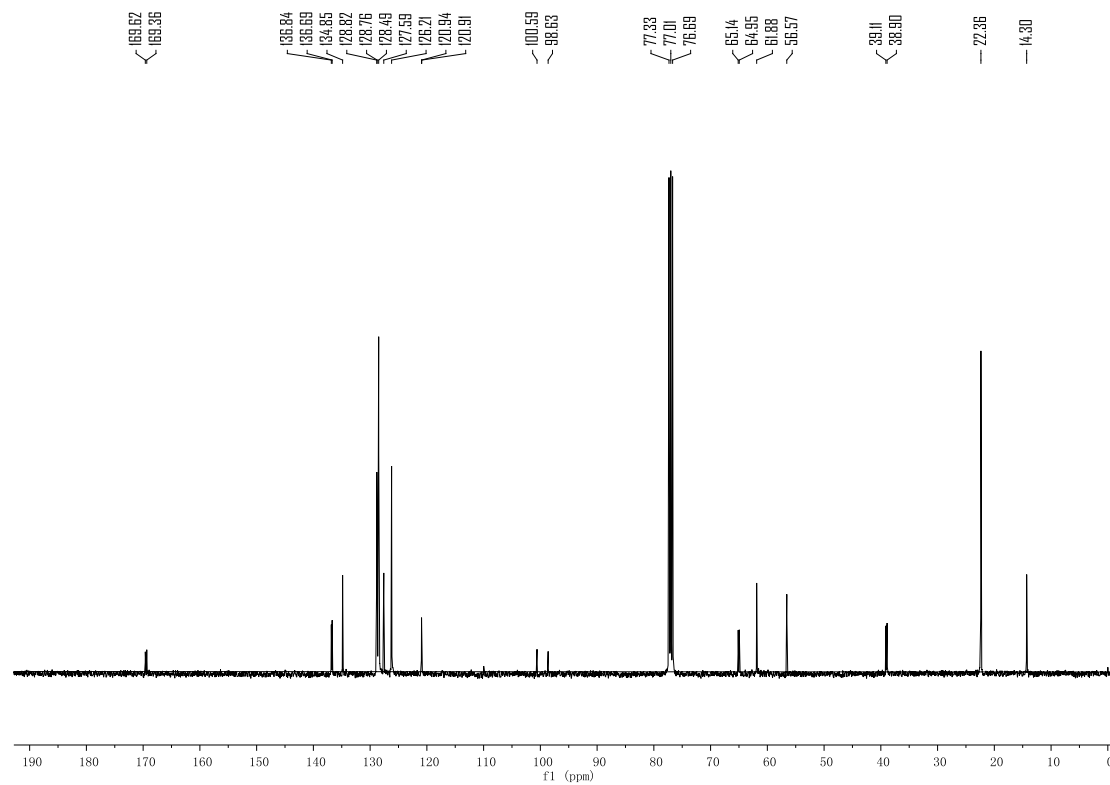

$^1\text{H}$  NMR (400 MHz,  $\text{CDCl}_3$ ) spectrum of **3j**

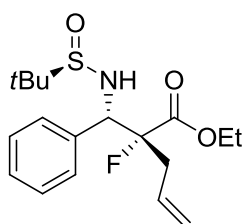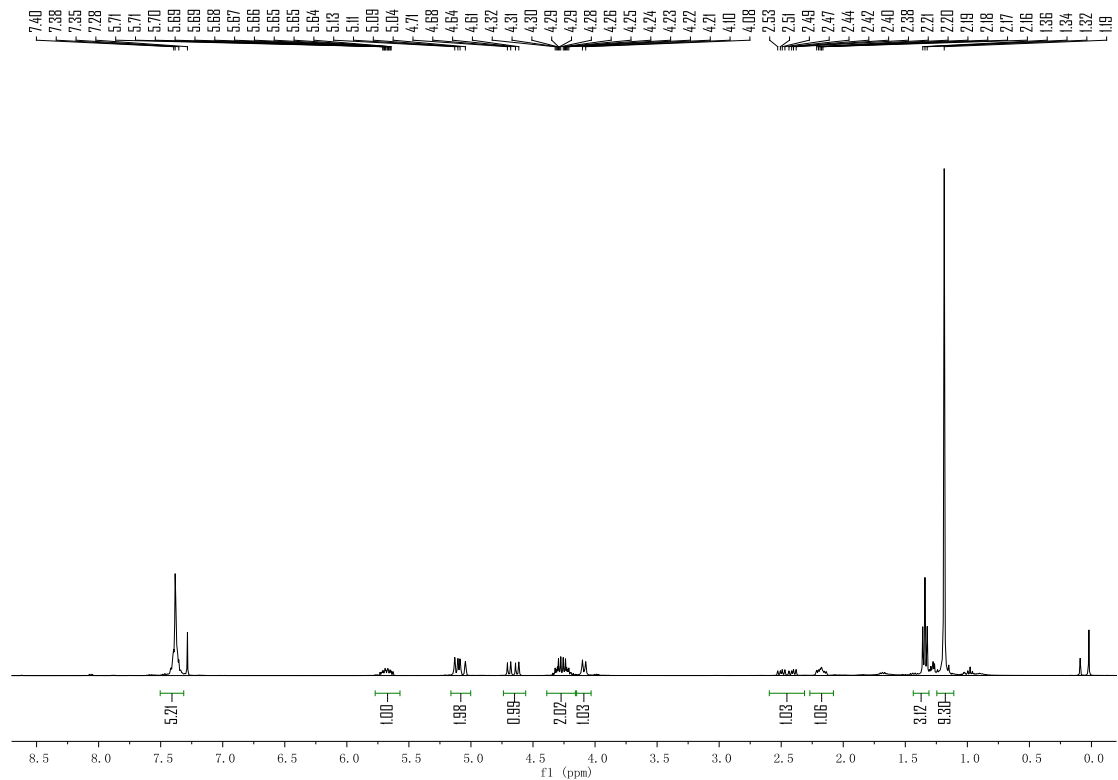

$^{19}\text{F}$  NMR (376 MHz,  $\text{CDCl}_3$ ) spectrum of **3j**

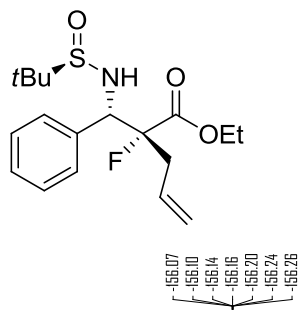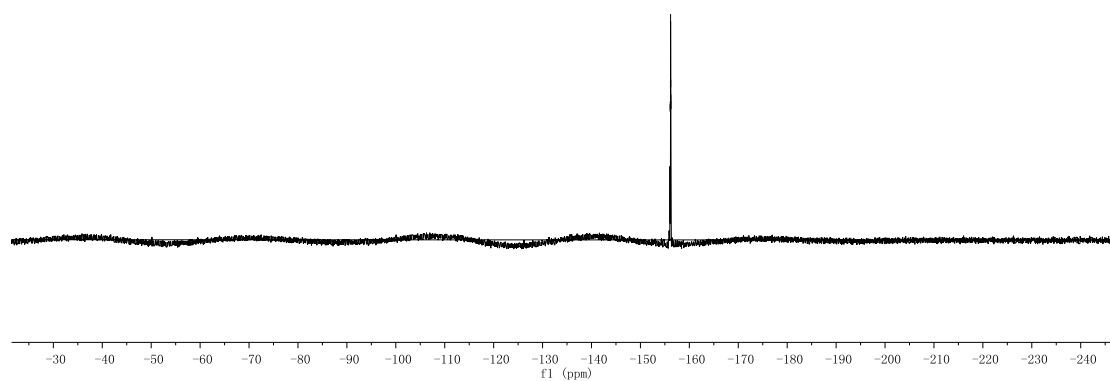

<sup>13</sup>C NMR (101 MHz, CDCl<sub>3</sub>) spectrum of **3j**

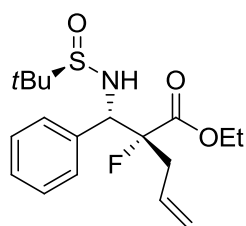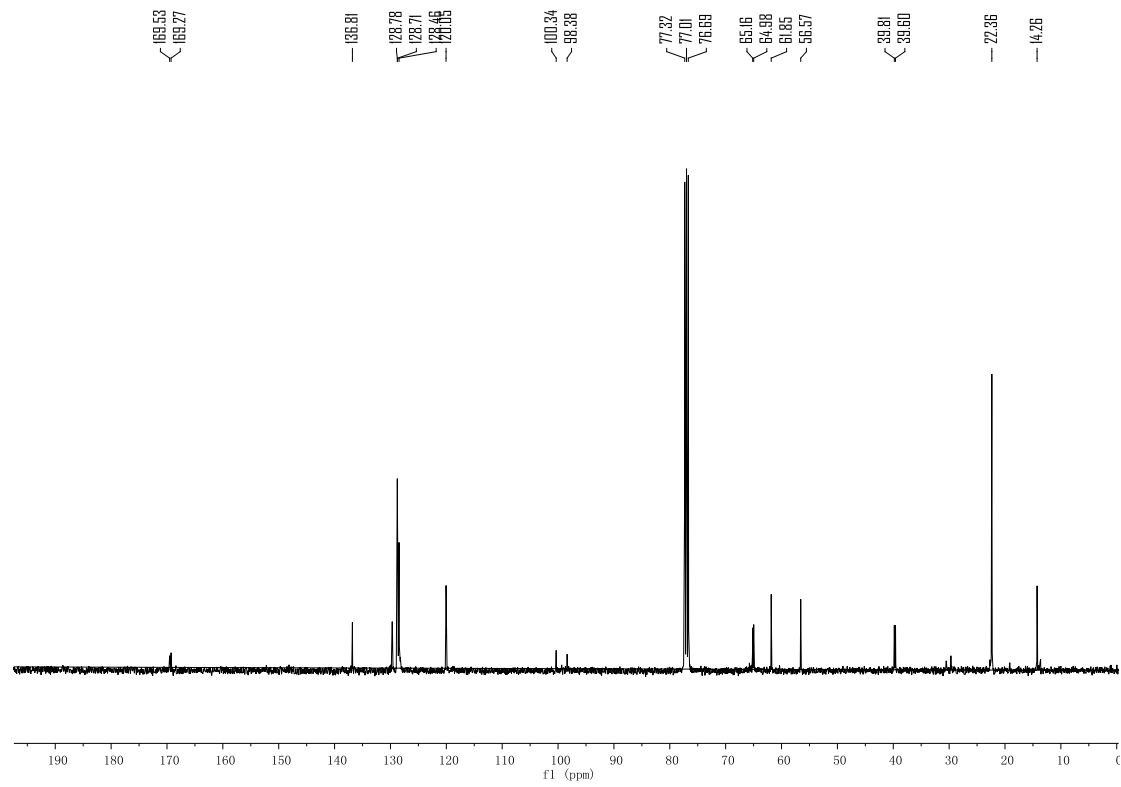

$^1\text{H}$  NMR (400 MHz,  $\text{CDCl}_3$ ) spectrum of **3k**

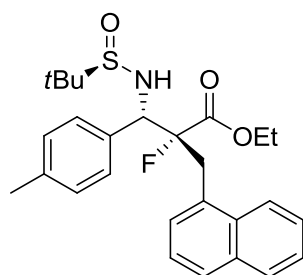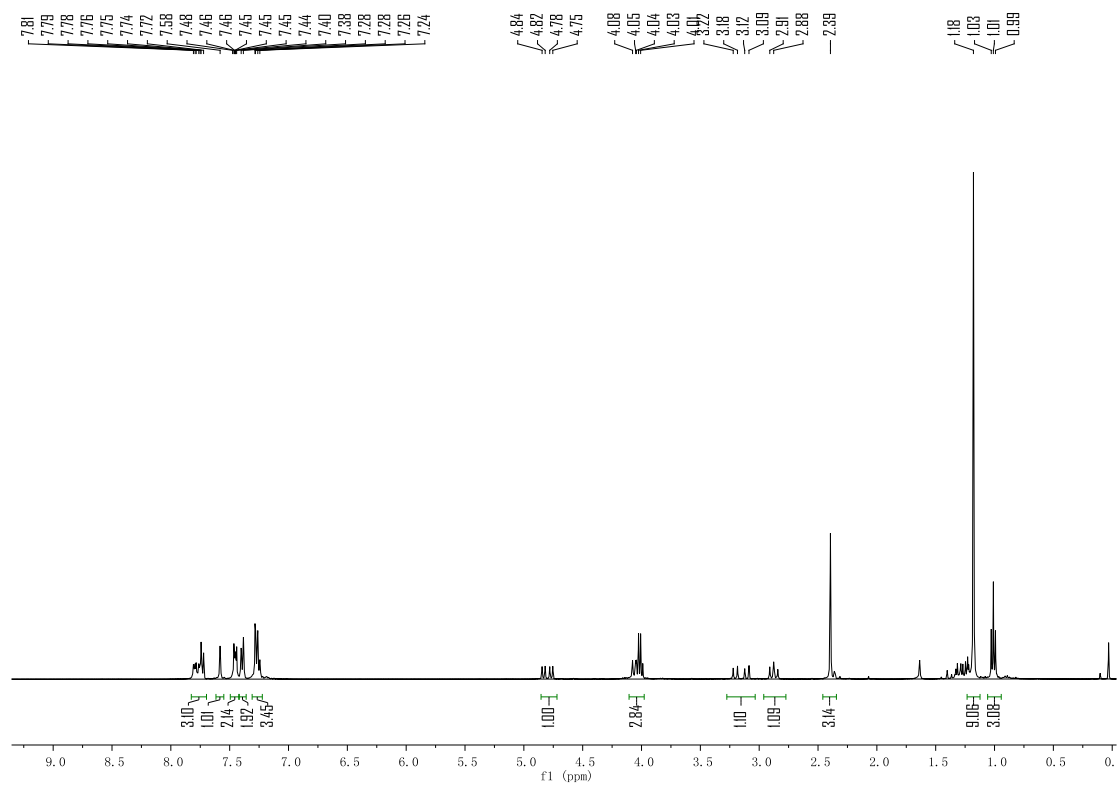

$^{19}\text{F}$  NMR (376 MHz,  $\text{CDCl}_3$ ) spectrum of **3k**

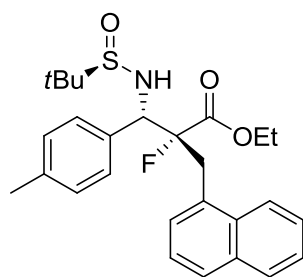

-177.39  
-177.42  
-177.49  
-177.56  
-177.59

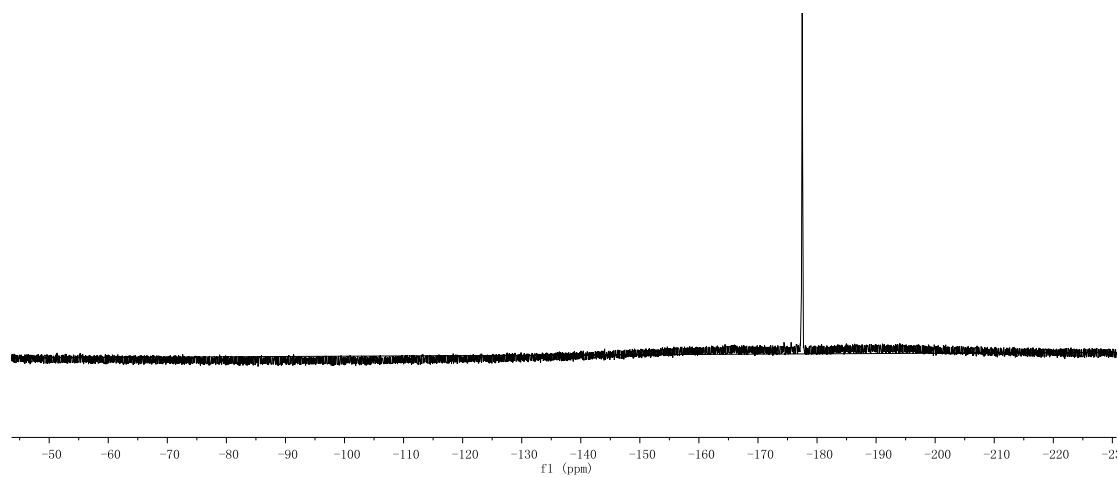

$^{13}\text{C}$  NMR (101 MHz,  $\text{CDCl}_3$ ) spectrum of **3k**

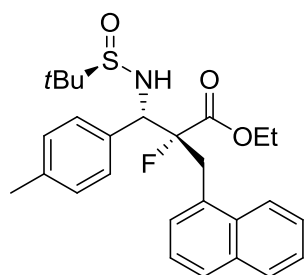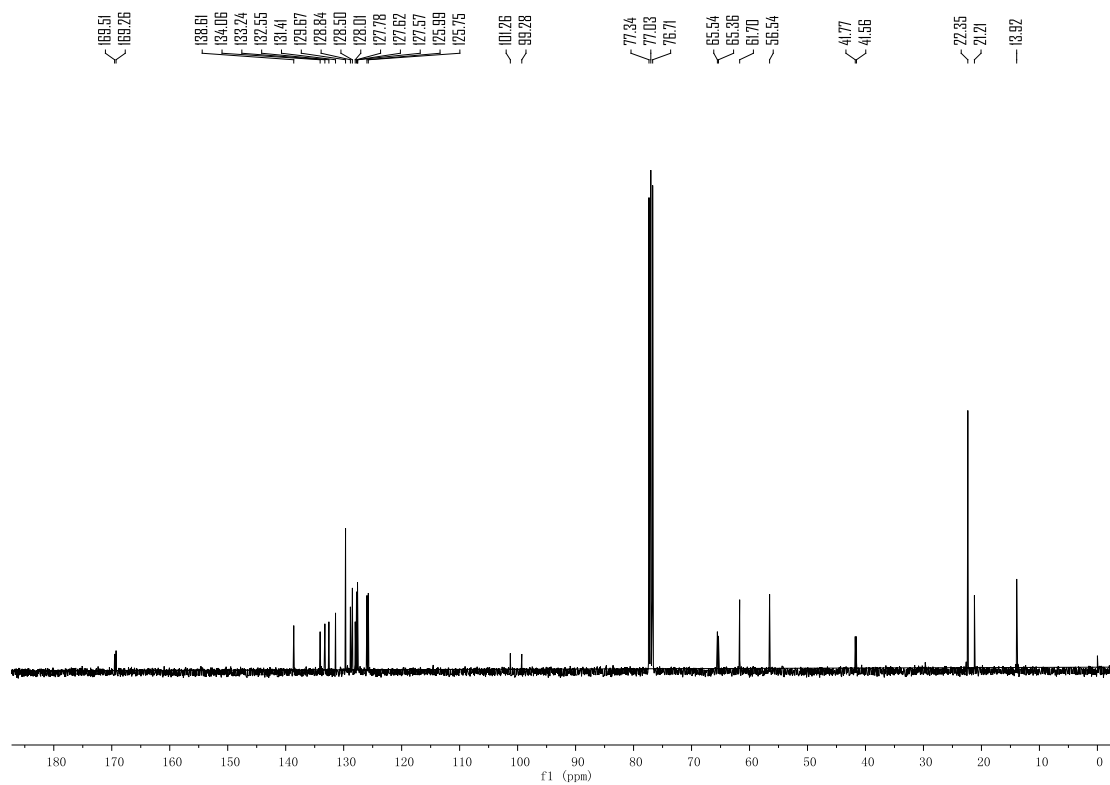

$^1\text{H}$  NMR (400 MHz,  $\text{CDCl}_3$ ) spectrum of **31**

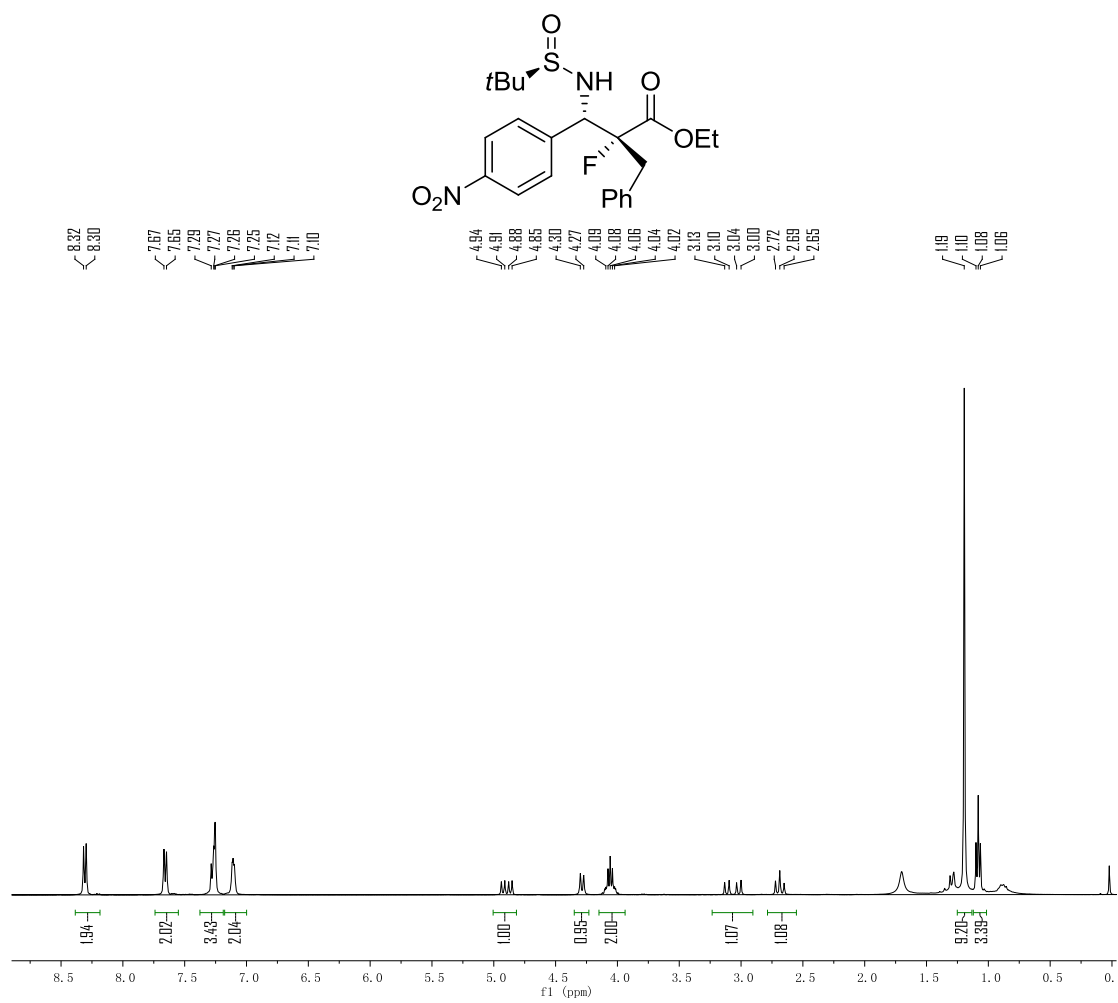



$^{19}\text{F}$  NMR (376 MHz,  $\text{CDCl}_3$ ) spectrum of **3I**

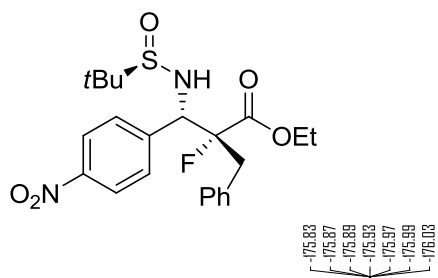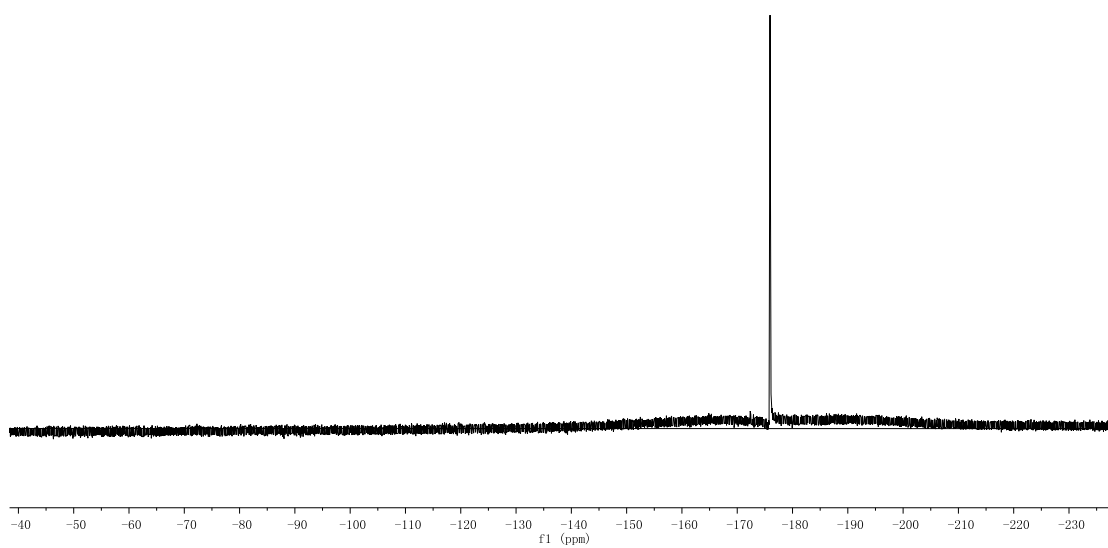

$^{13}\text{C}$  NMR (101 MHz,  $\text{CDCl}_3$ ) spectrum of **31**

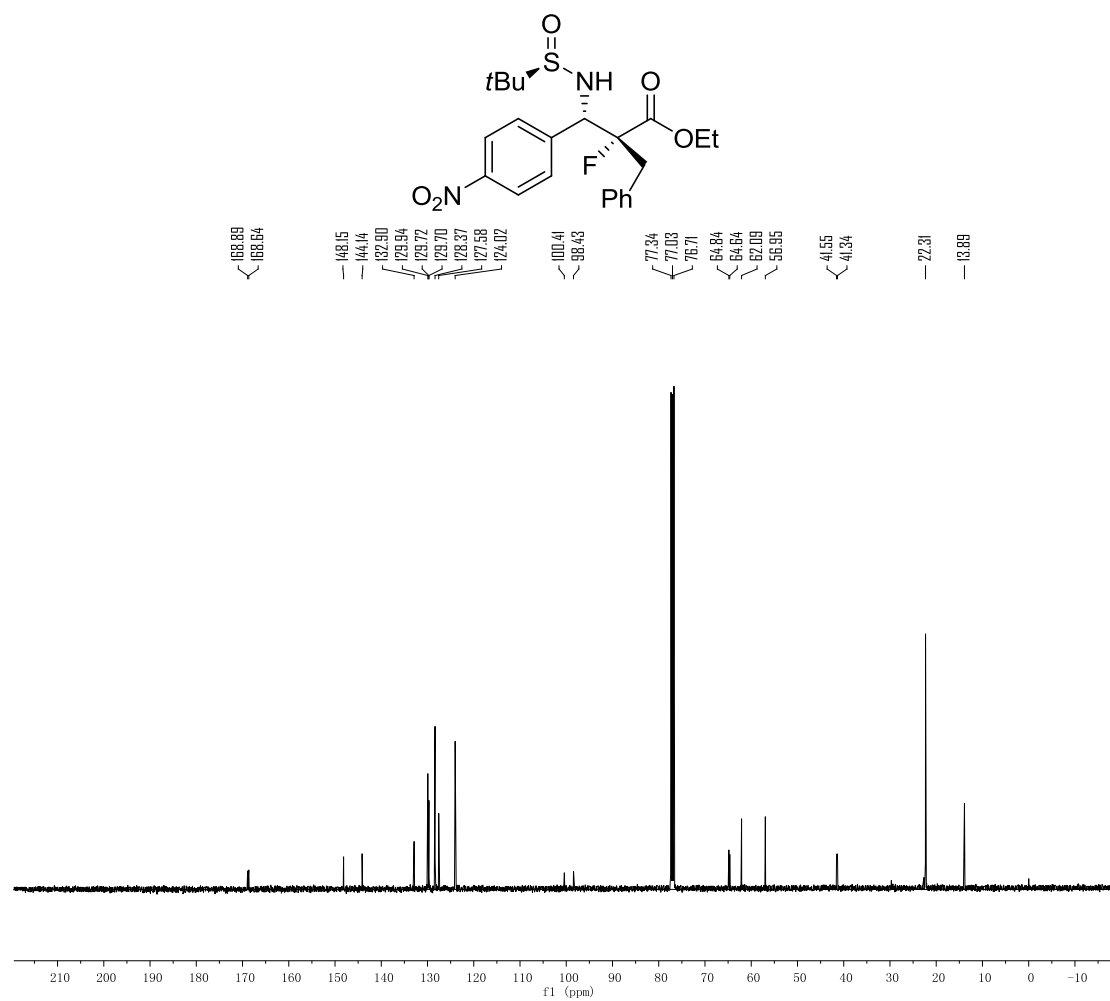

$^1\text{H}$  NMR (400 MHz,  $\text{CDCl}_3$ ) spectrum of **3m**

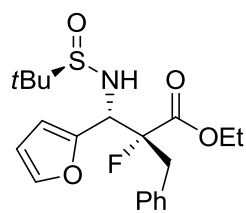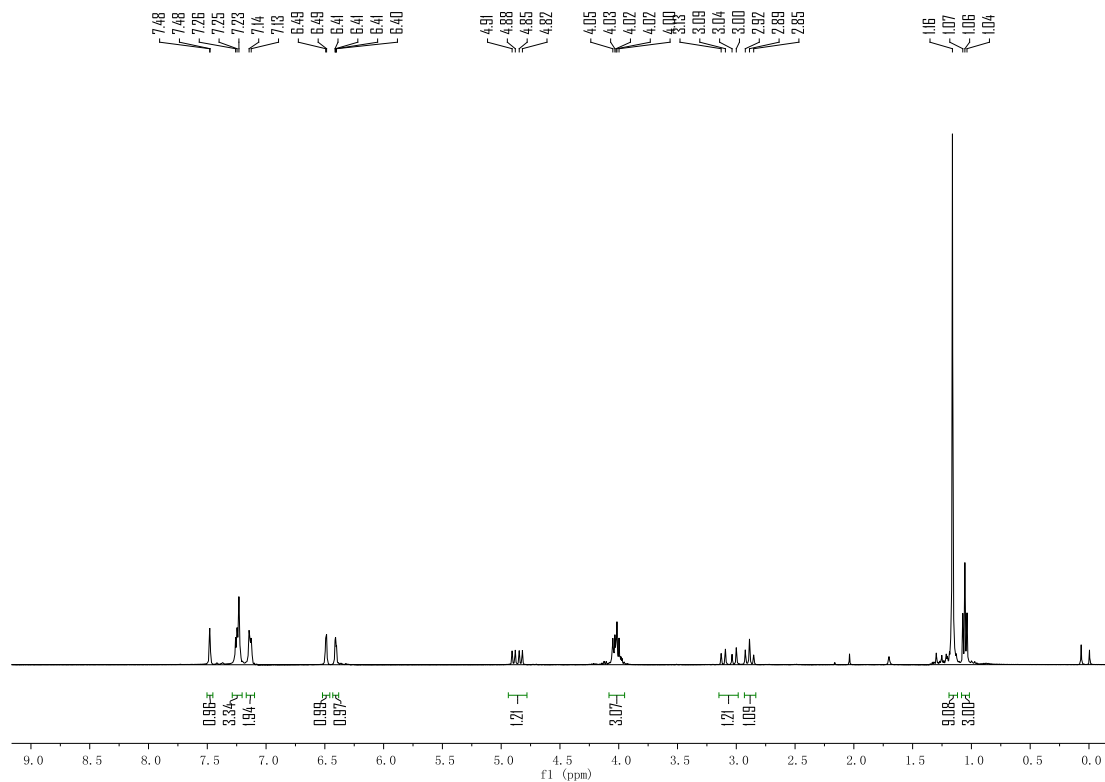

$^{19}\text{F}$  NMR (376 MHz,  $\text{CDCl}_3$ ) spectrum of **3m**

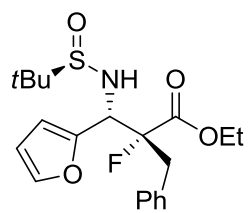

-174.88  
-174.92  
-174.95  
-174.98  
-175.02  
-175.04  
-175.08

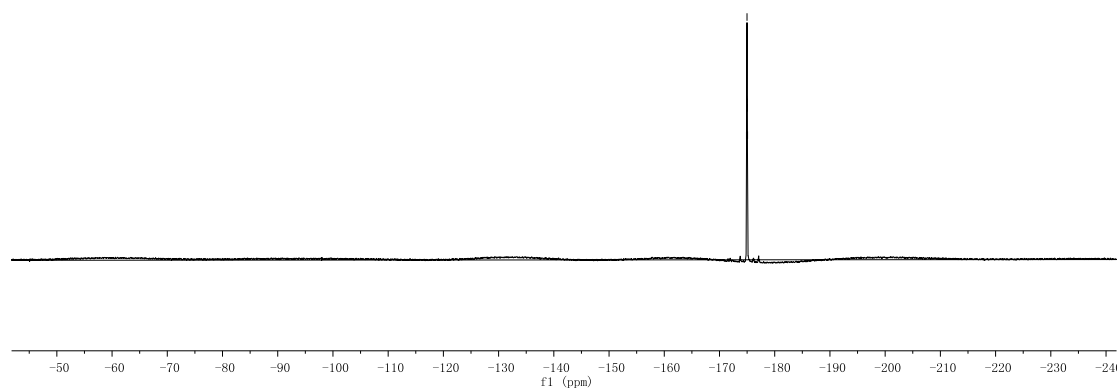

$^{13}\text{C}$  NMR (101 MHz,  $\text{CDCl}_3$ ) spectrum of **3m**

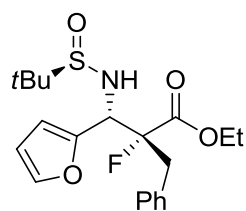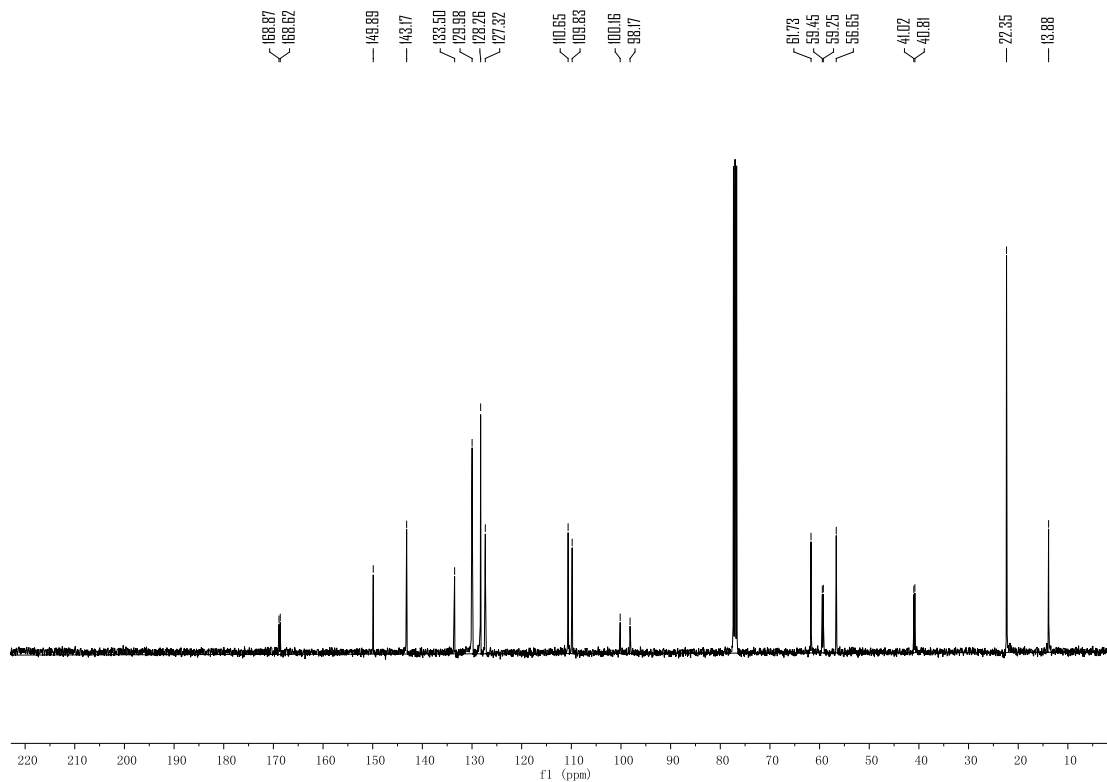

<sup>1</sup>H NMR (400 MHz, CDCl<sub>3</sub>) spectrum of **3n**

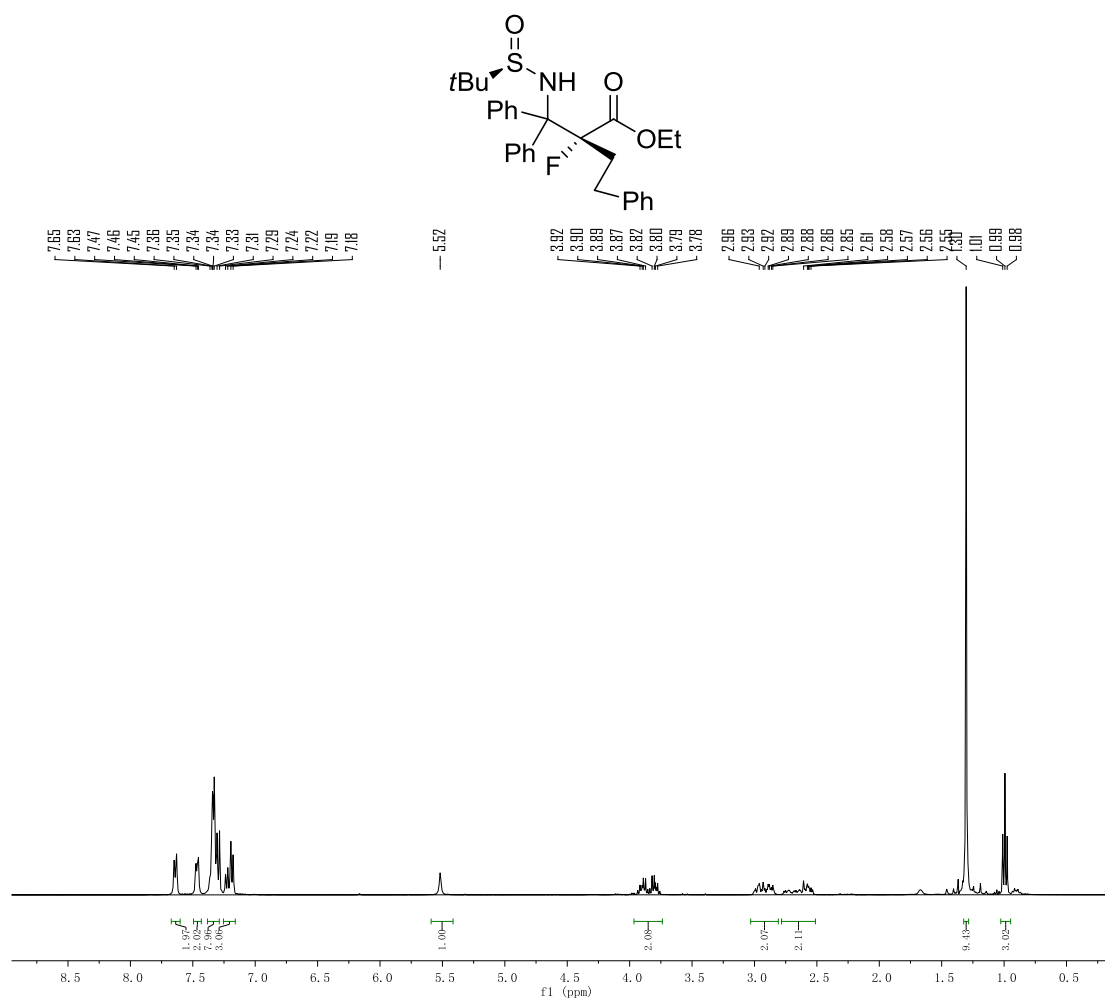

$^{19}\text{F}$  NMR (376 MHz,  $\text{CDCl}_3$ ) spectrum of **3n**

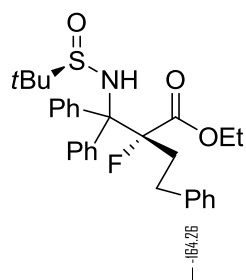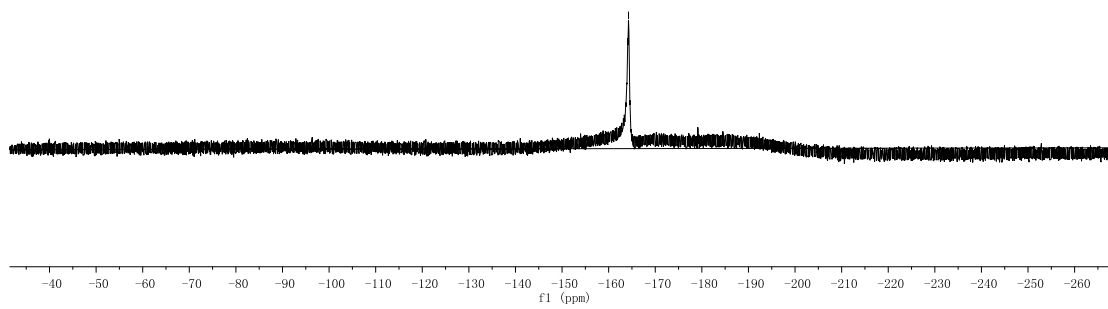

$^{13}\text{C}$  NMR (101 MHz,  $\text{CDCl}_3$ ) spectrum of **3n**

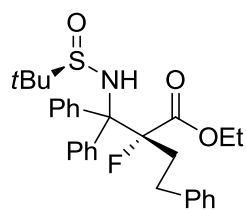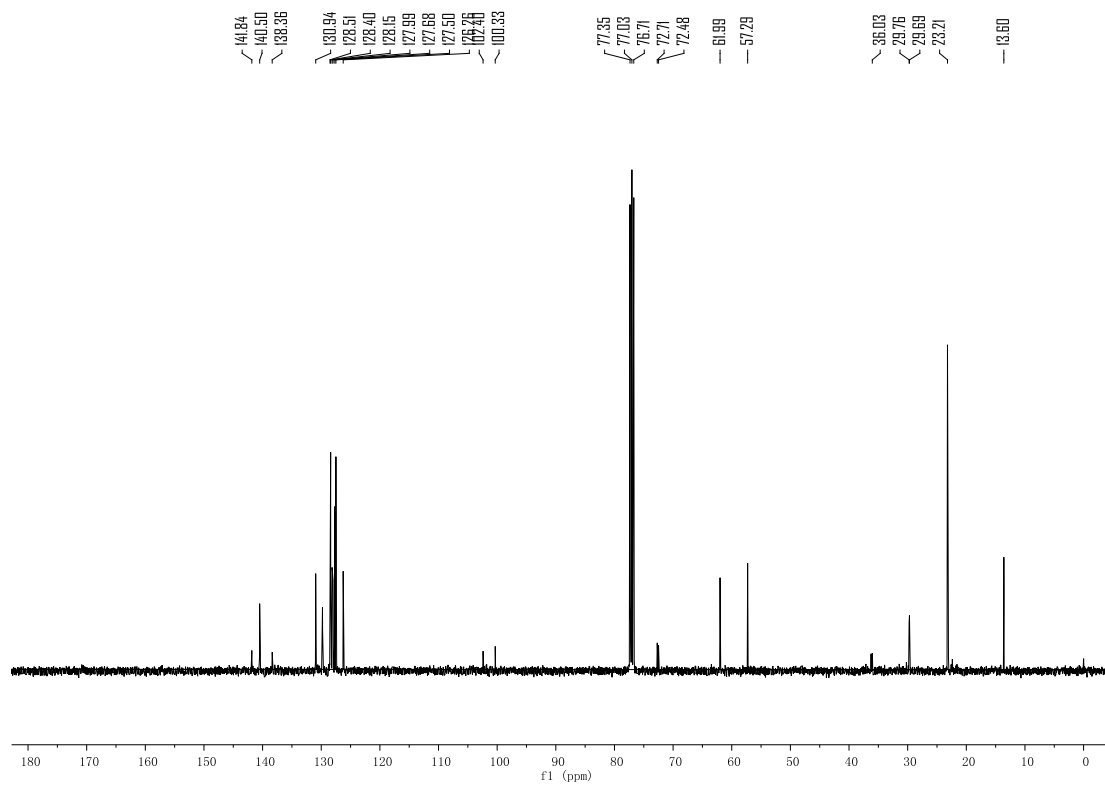



$^1\text{H}$  NMR (400 MHz,  $\text{CDCl}_3$ ) spectrum of **5a**

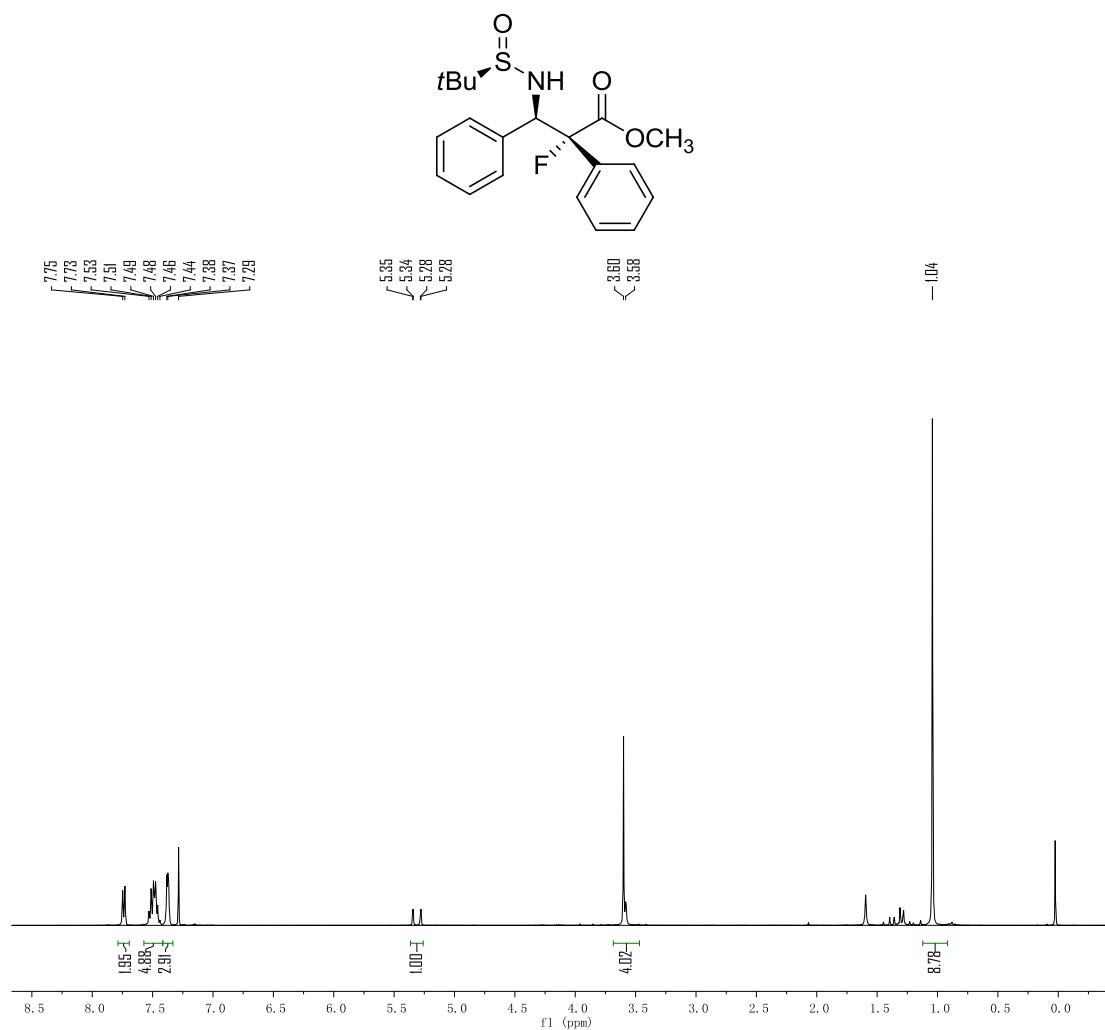

$^{19}\text{F}$  NMR (376 MHz,  $\text{CDCl}_3$ ) spectrum of **5a**

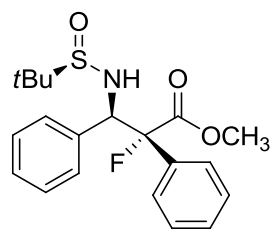

178.56  
178.63

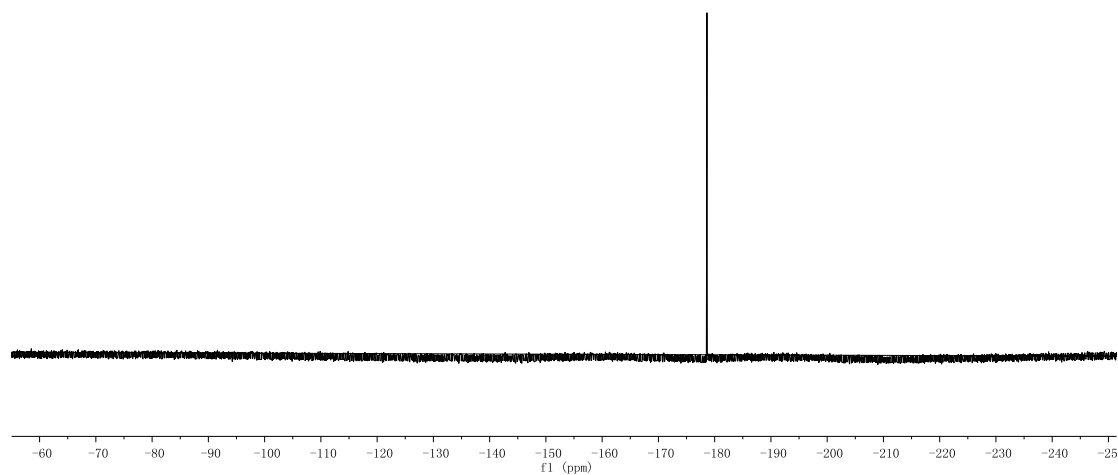

$^{13}\text{C}$  NMR (101 MHz,  $\text{CDCl}_3$ ) spectrum of **5a**

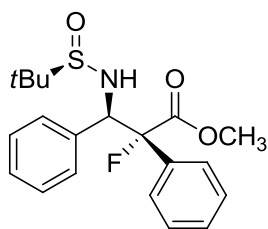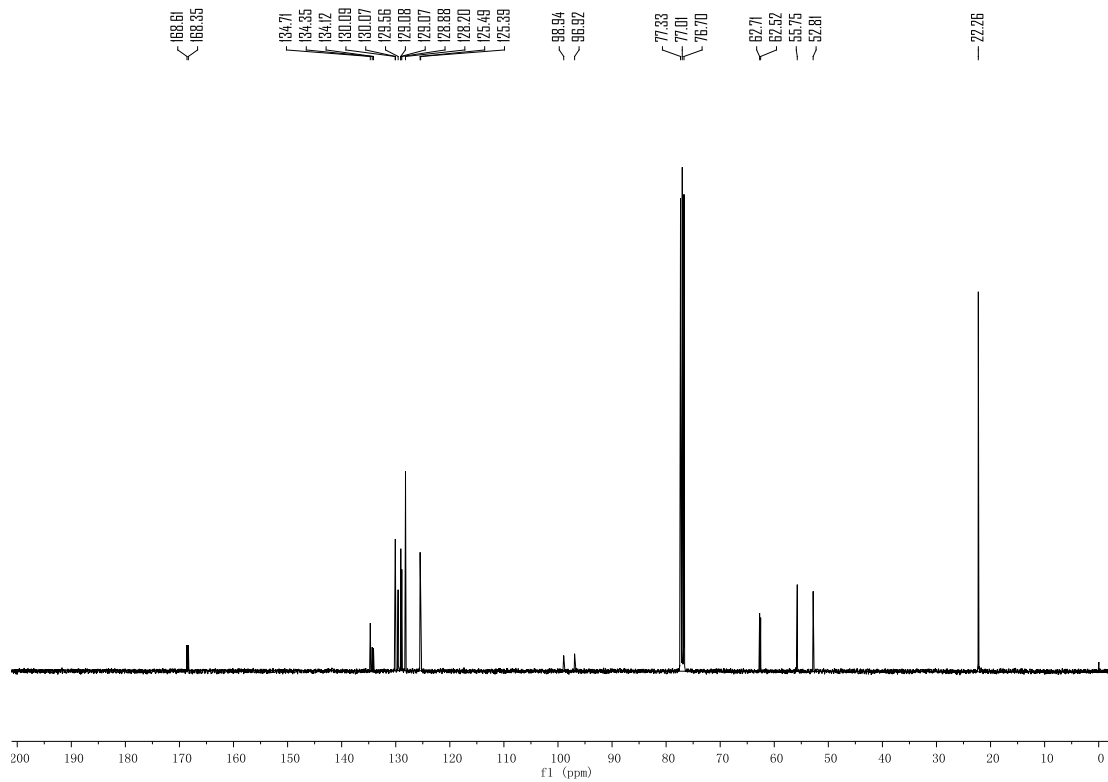

$^1\text{H}$  NMR (400 MHz,  $\text{CDCl}_3$ ) spectrum of **5b**

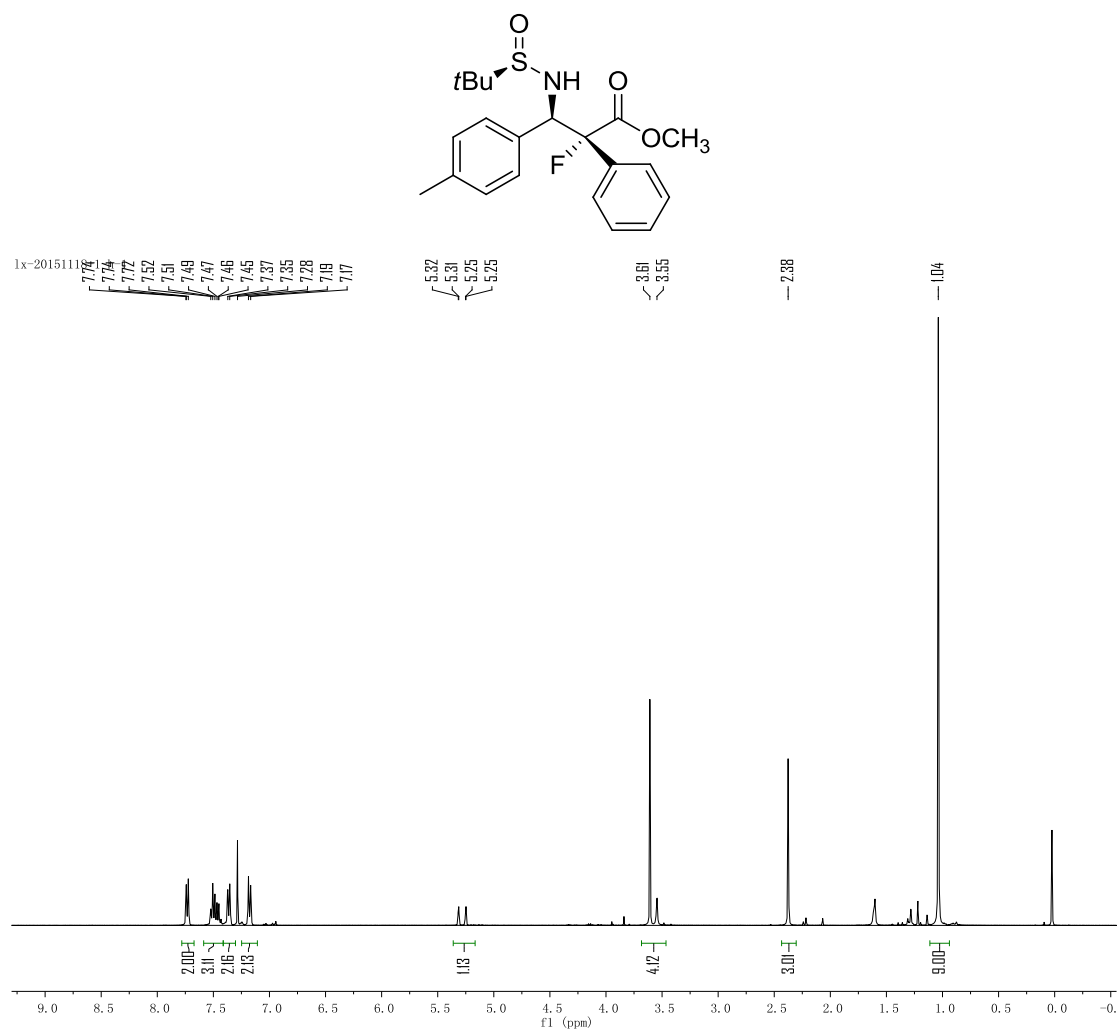

$^{19}\text{F}$  NMR (376 MHz,  $\text{CDCl}_3$ ) spectrum of **5b**

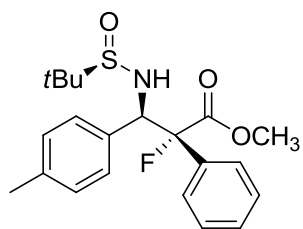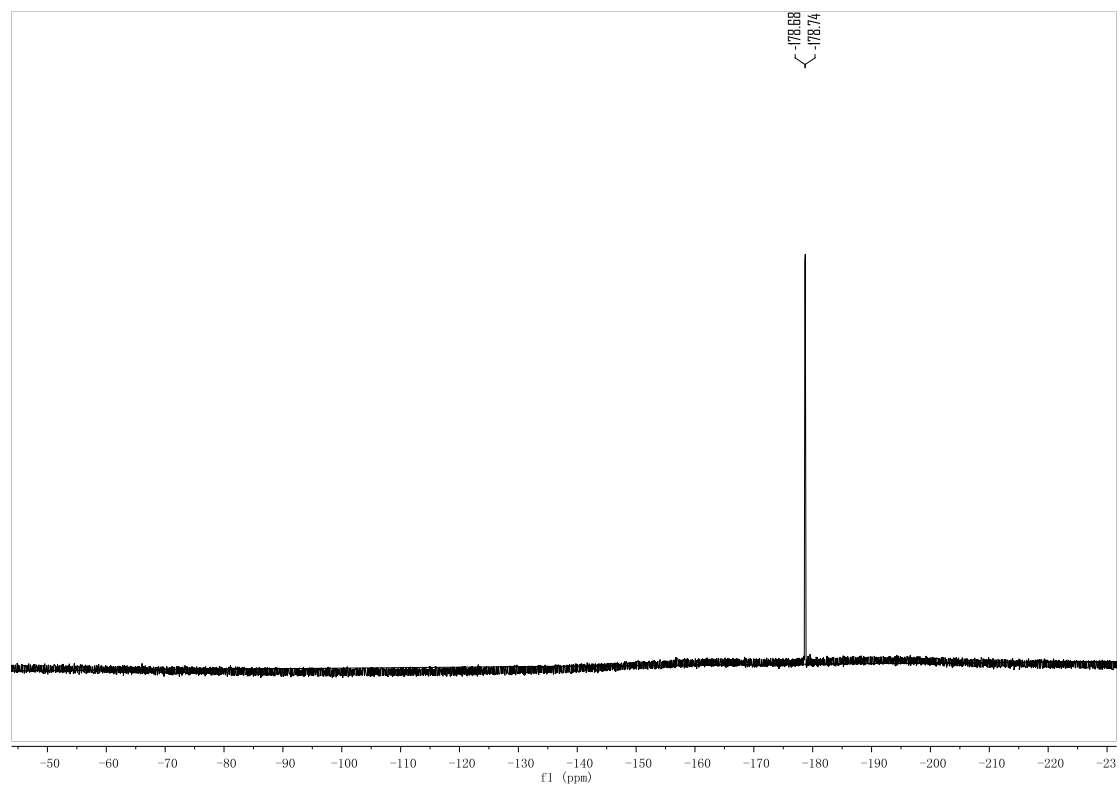

<sup>13</sup>C NMR (101 MHz, CDCl<sub>3</sub>) spectrum of **5b**

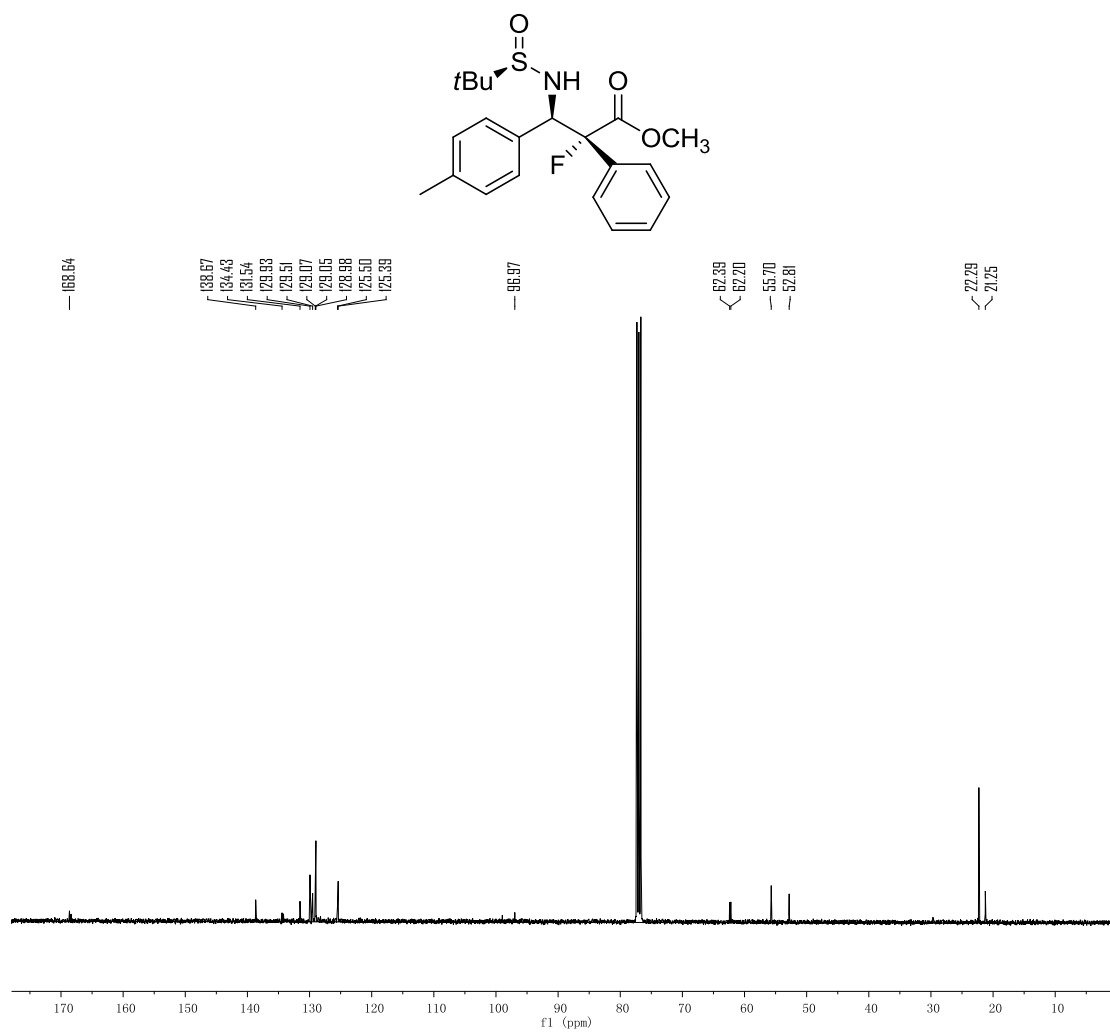

$^1\text{H}$  NMR (400 MHz,  $\text{CDCl}_3$ ) spectrum of **5c**

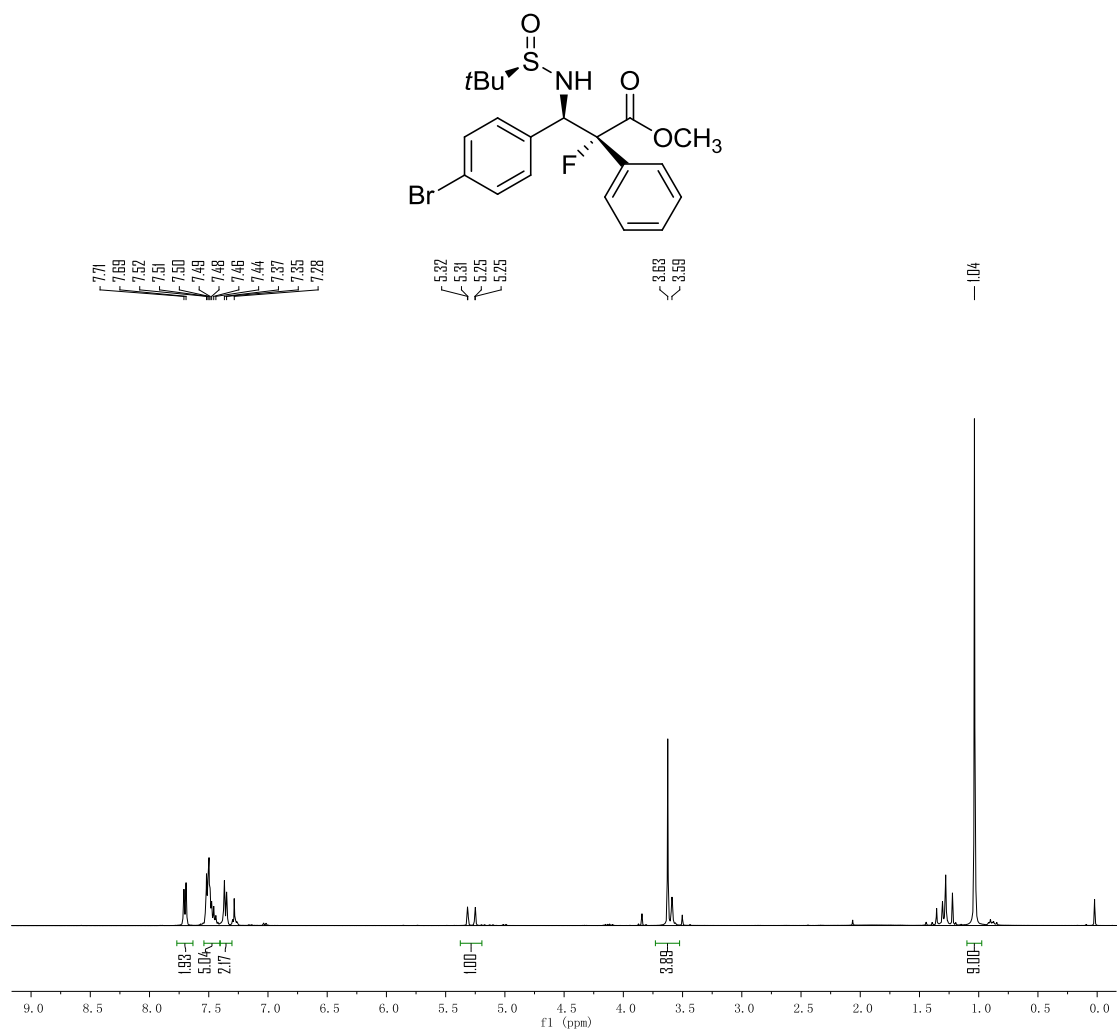

$^{19}\text{F}$  NMR (376 MHz,  $\text{CDCl}_3$ ) spectrum of **5c**

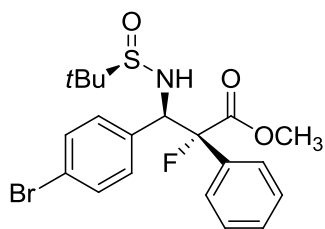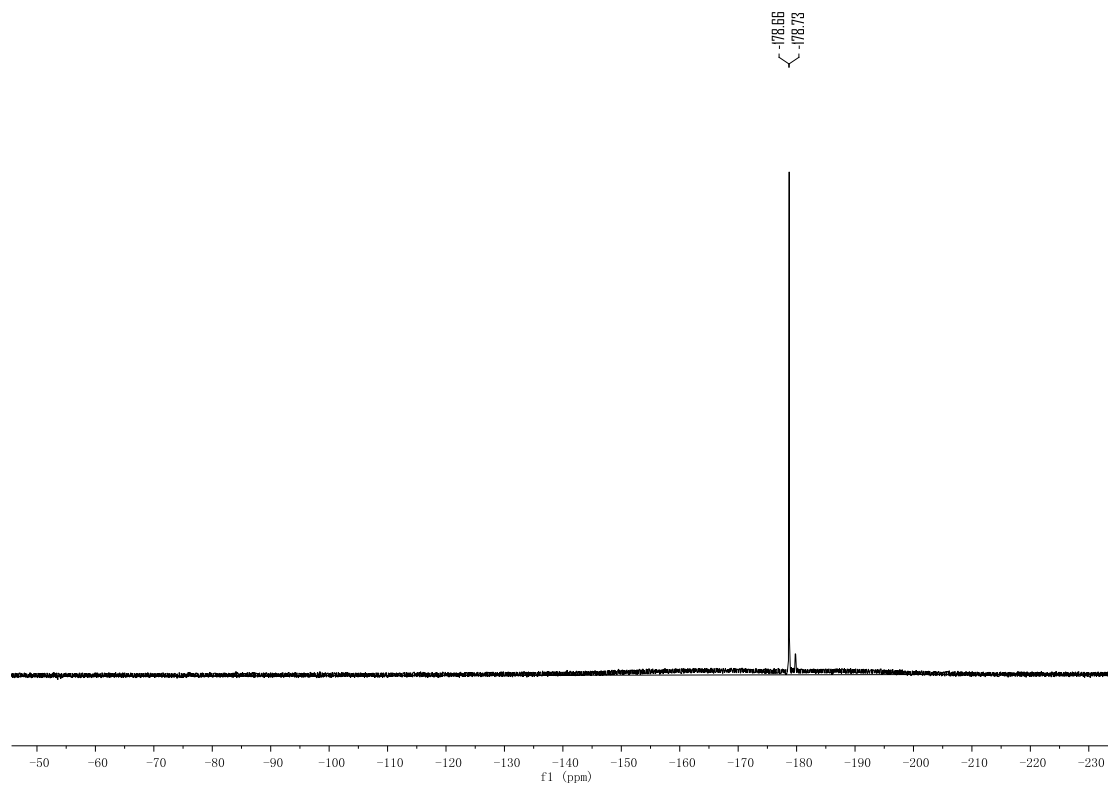



$^{13}\text{C}$  NMR (101 MHz,  $\text{CDCl}_3$ ) spectrum of **5c**

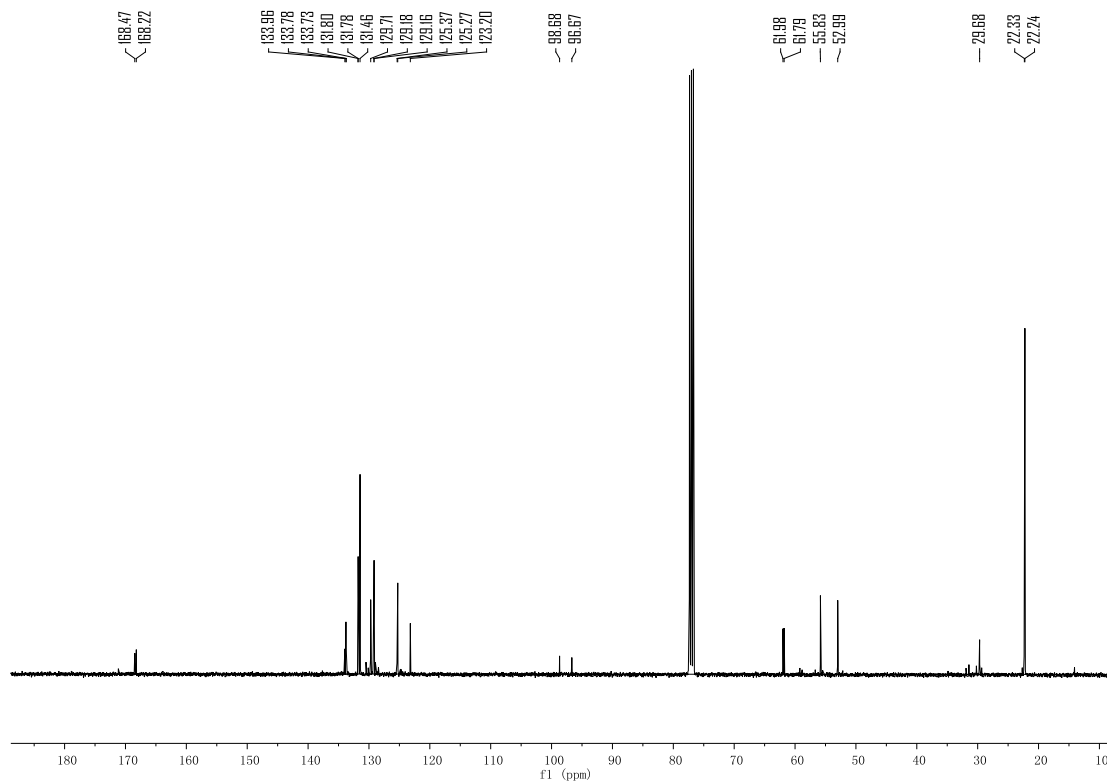

$^1\text{H}$  NMR (400 MHz,  $\text{CDCl}_3$ ) spectrum of **5d**

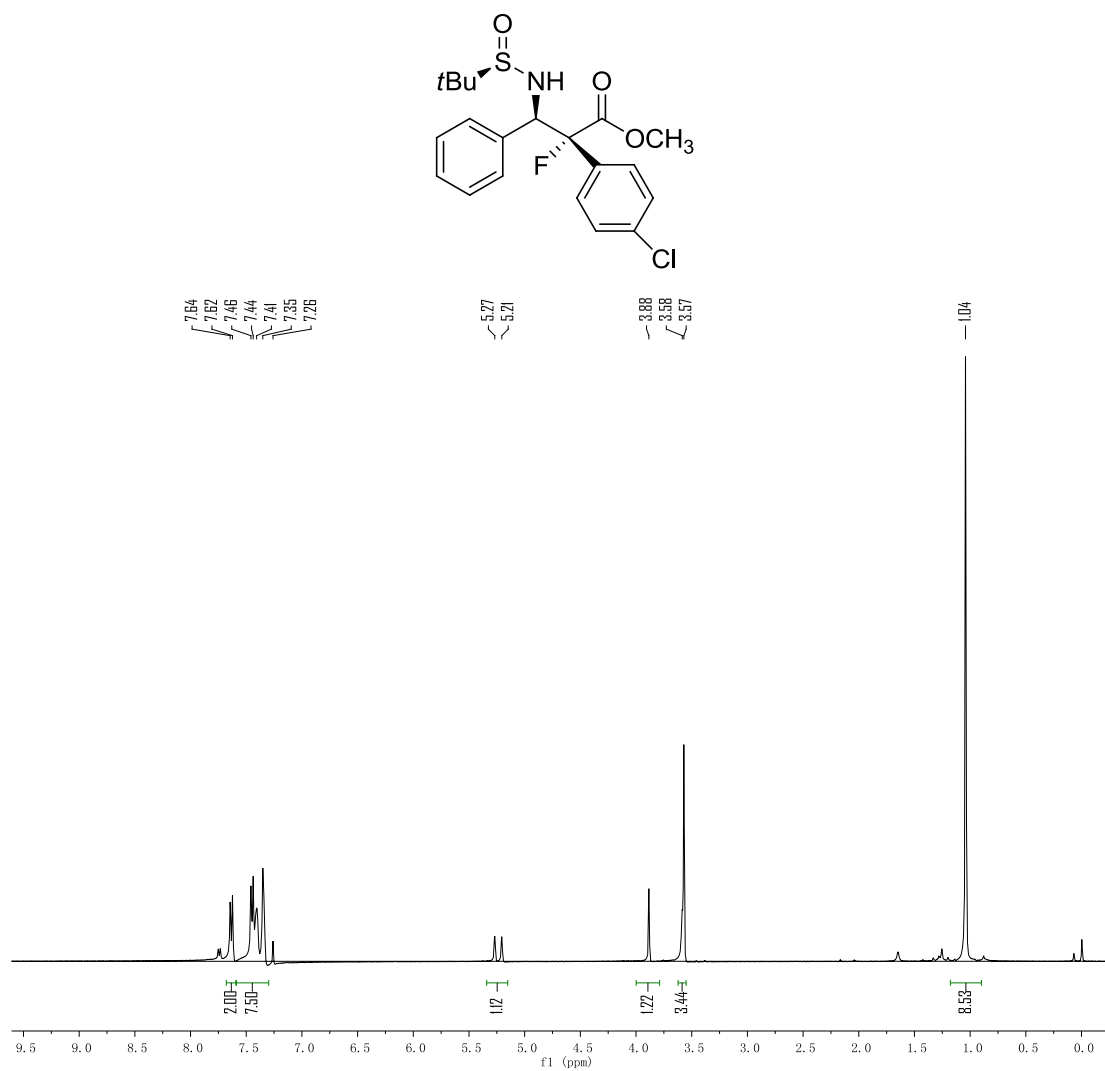

$^{19}\text{F}$  NMR (376 MHz,  $\text{CDCl}_3$ ) spectrum of **5d**

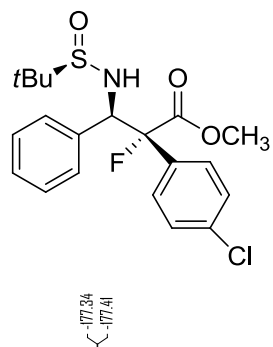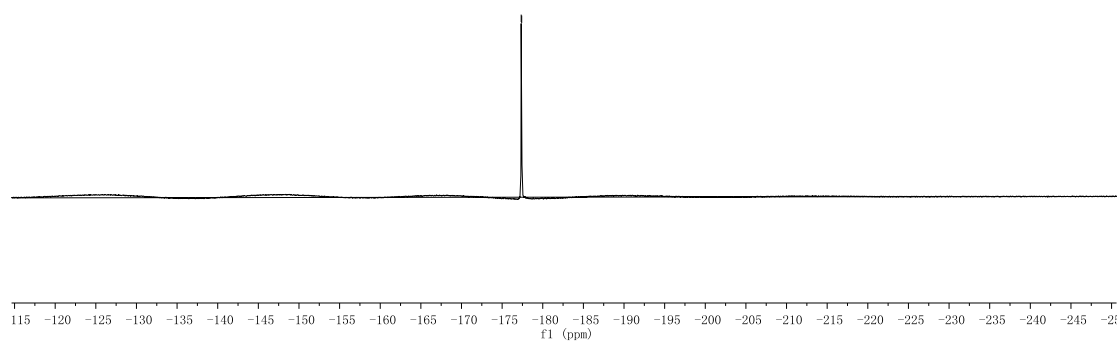

$^{13}\text{C}$  NMR (101 MHz,  $\text{CDCl}_3$ ) spectrum of **5d**

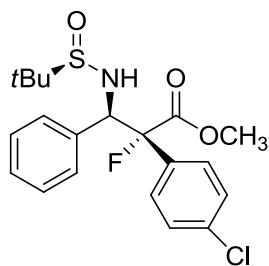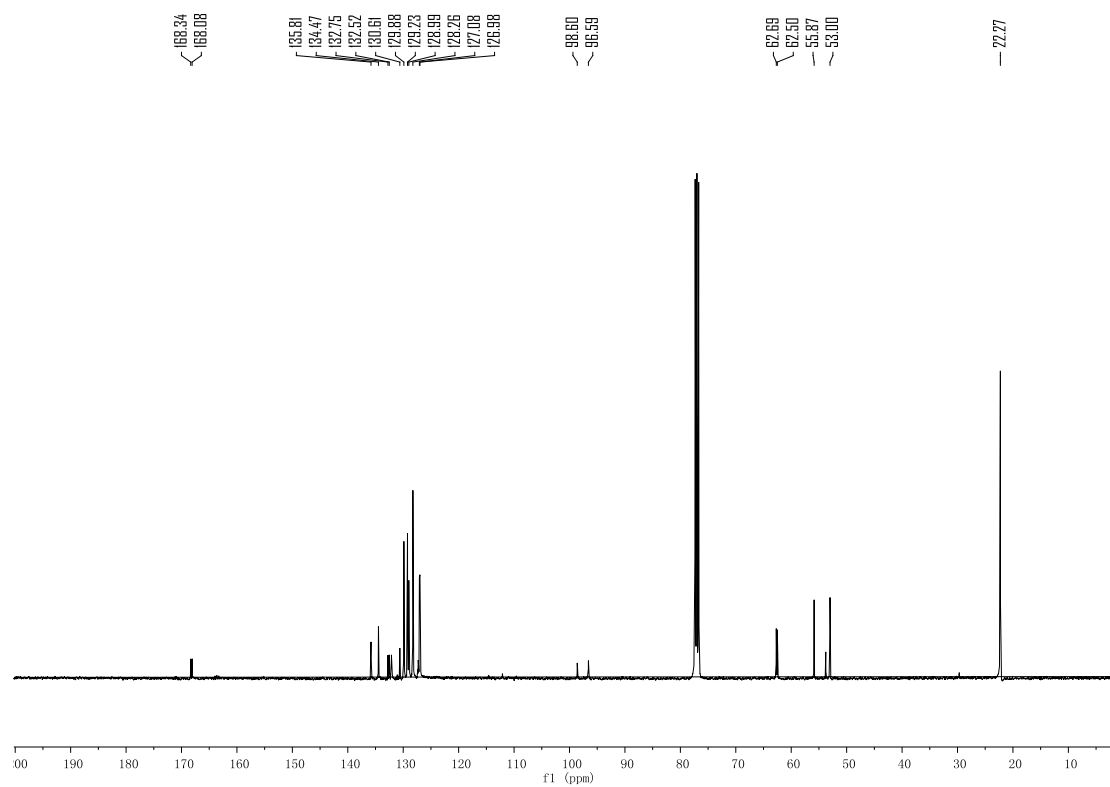

$^1\text{H}$  NMR (400 MHz,  $\text{CDCl}_3$ ) spectrum of **5e**

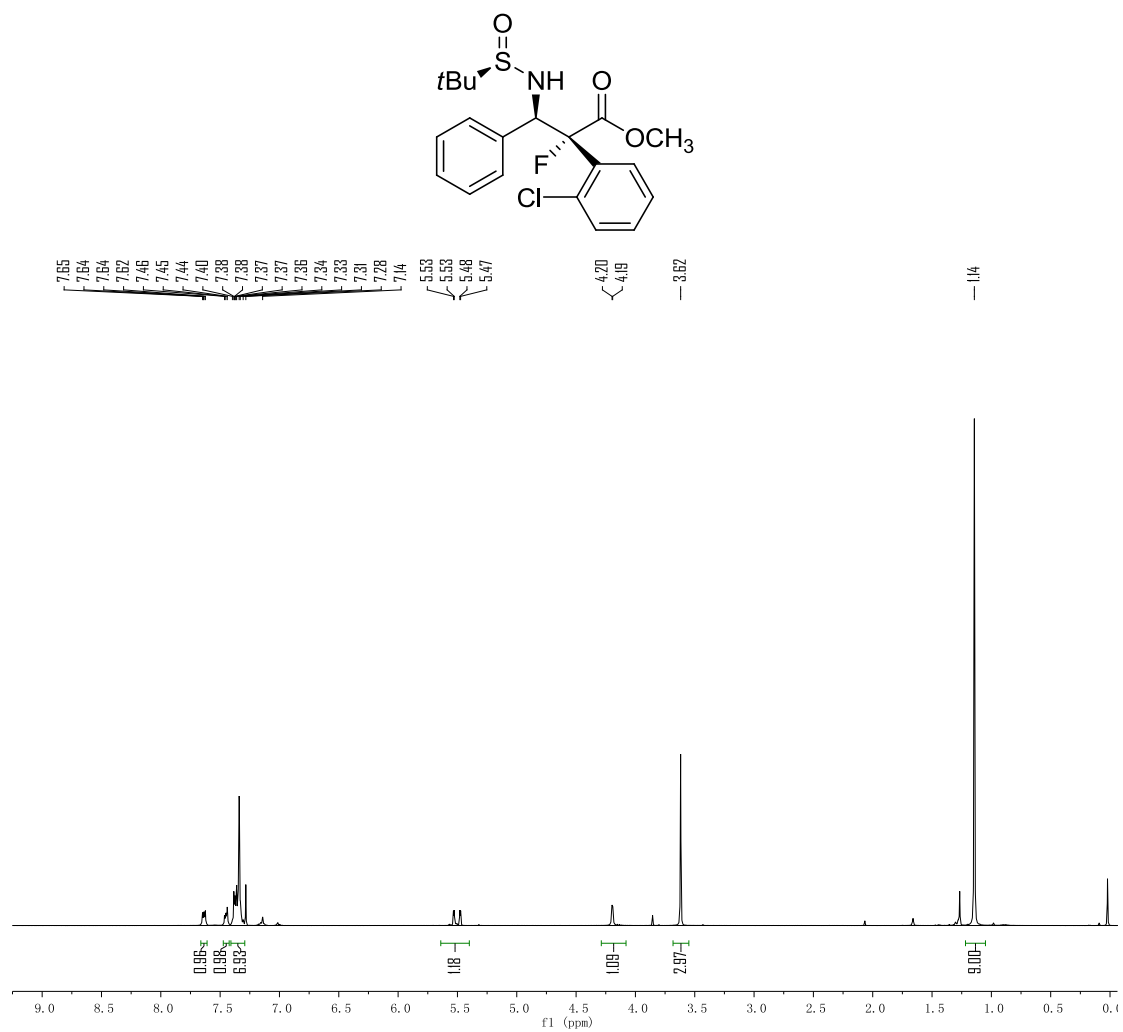

$^{19}\text{F}$  NMR (376 MHz,  $\text{CDCl}_3$ ) spectrum of **5e**

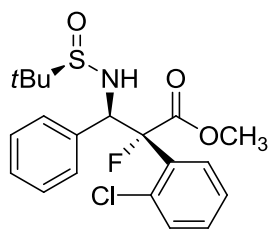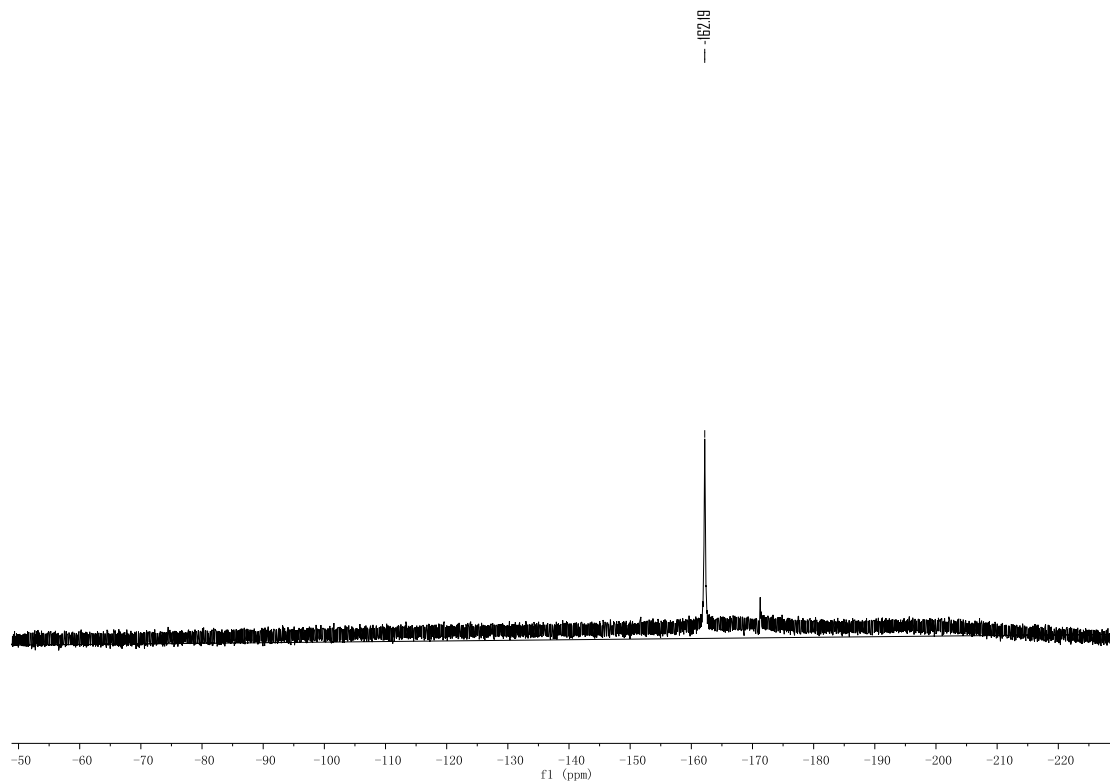

$^{13}\text{C}$  NMR (101 MHz,  $\text{CDCl}_3$ ) spectrum of **5e**

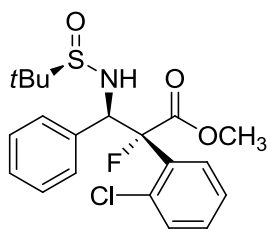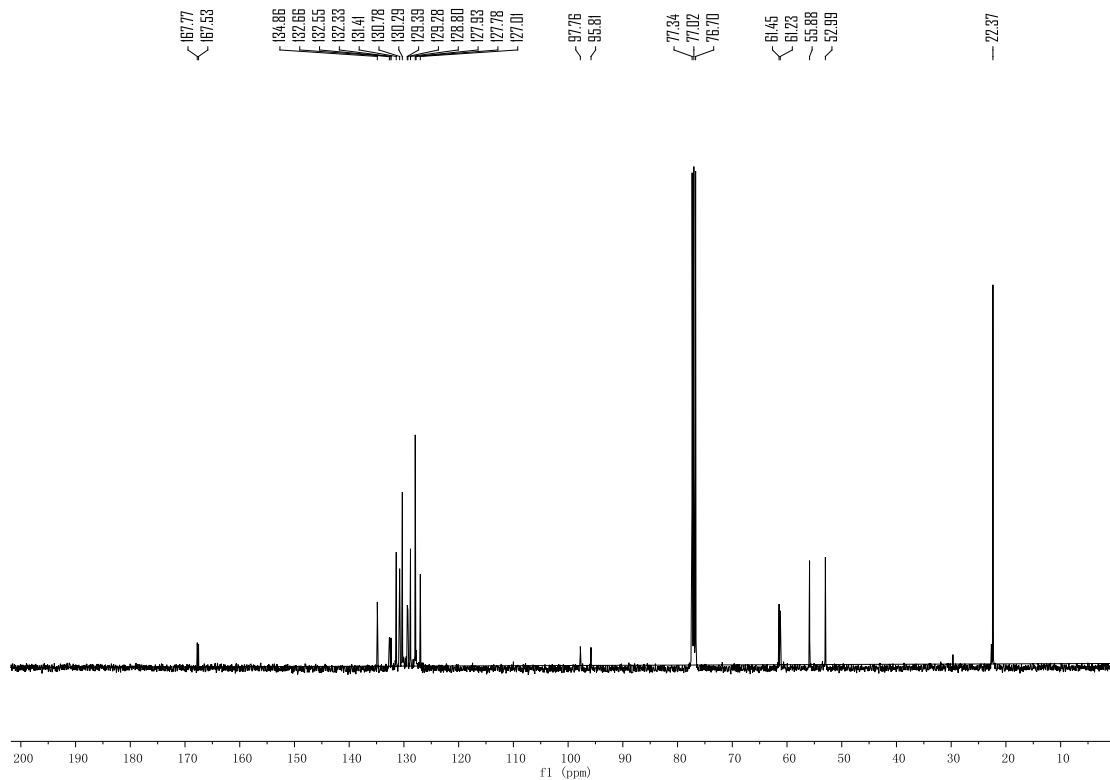

$^1\text{H}$  NMR (400 MHz,  $\text{CDCl}_3$ ) spectrum of **5f**

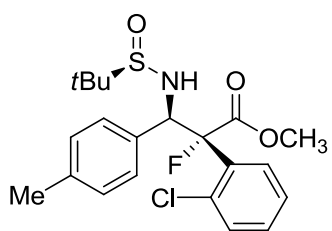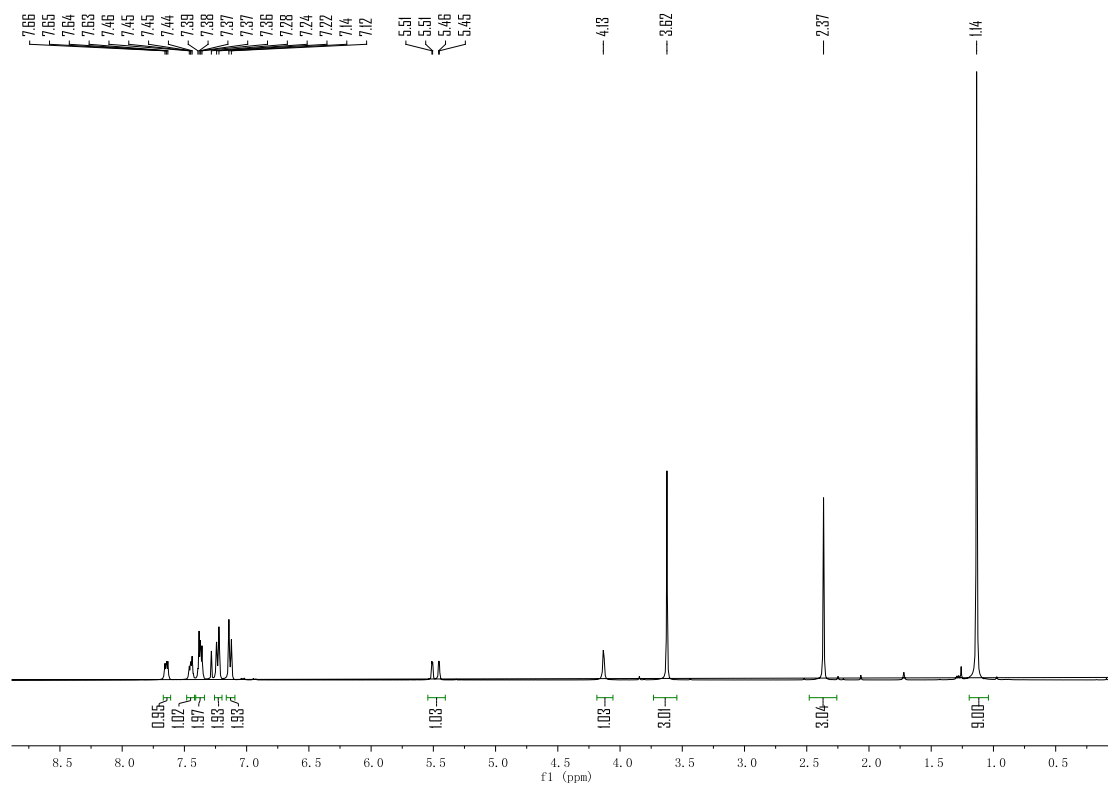



$^{19}\text{F}$  NMR (376 MHz,  $\text{CDCl}_3$ ) spectrum of **5f**

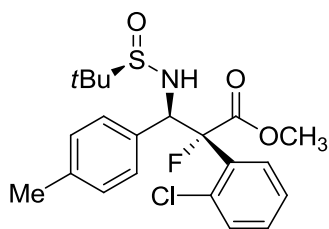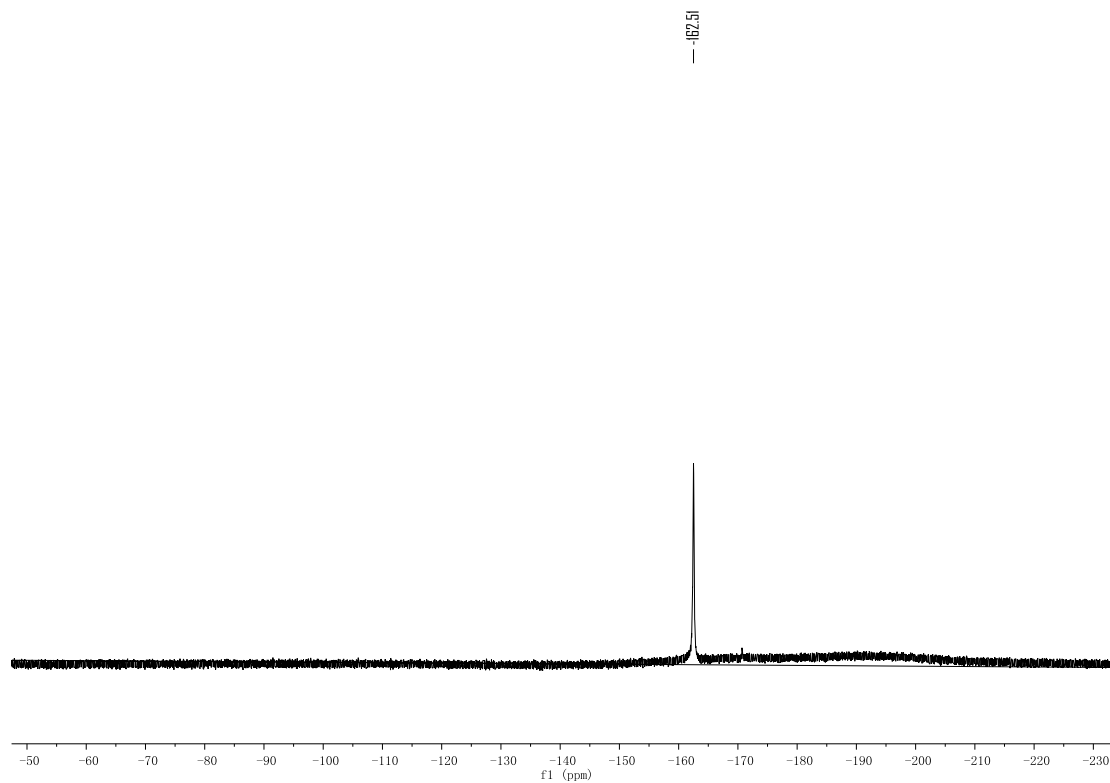

$^{13}\text{C}$  NMR (101 MHz,  $\text{CDCl}_3$ ) spectrum of **5f**

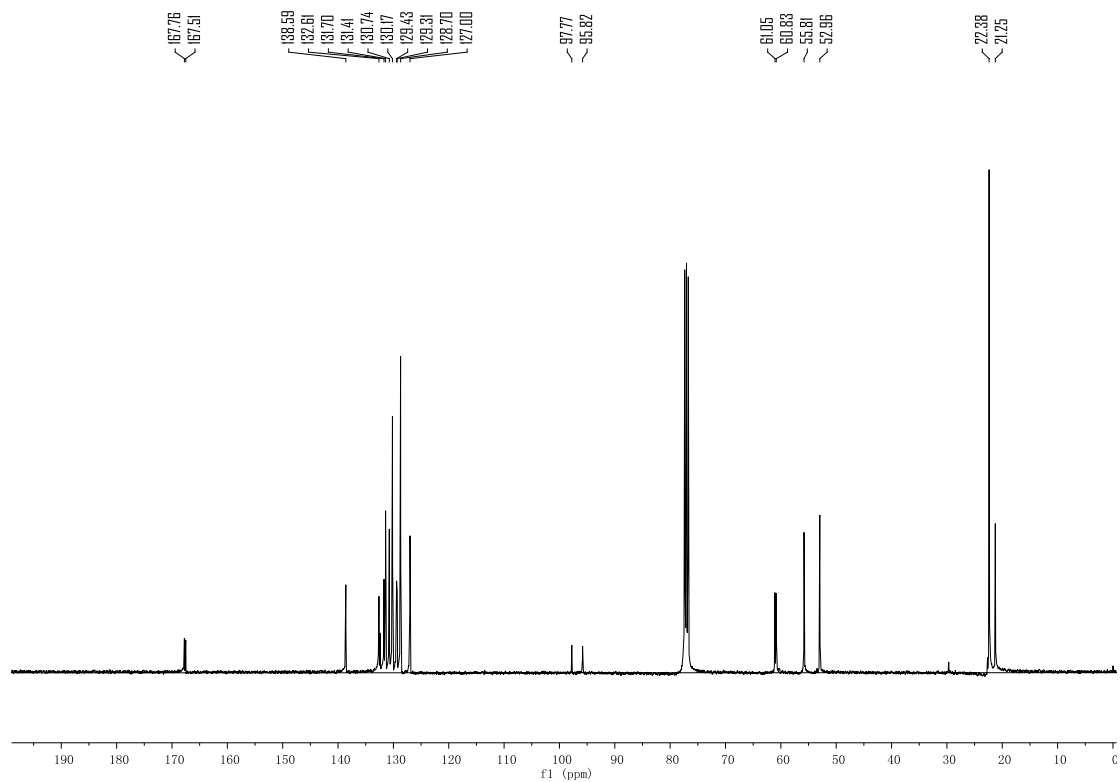

$^1\text{H}$  NMR (400 MHz,  $\text{CDCl}_3$ ) spectrum of **5g**

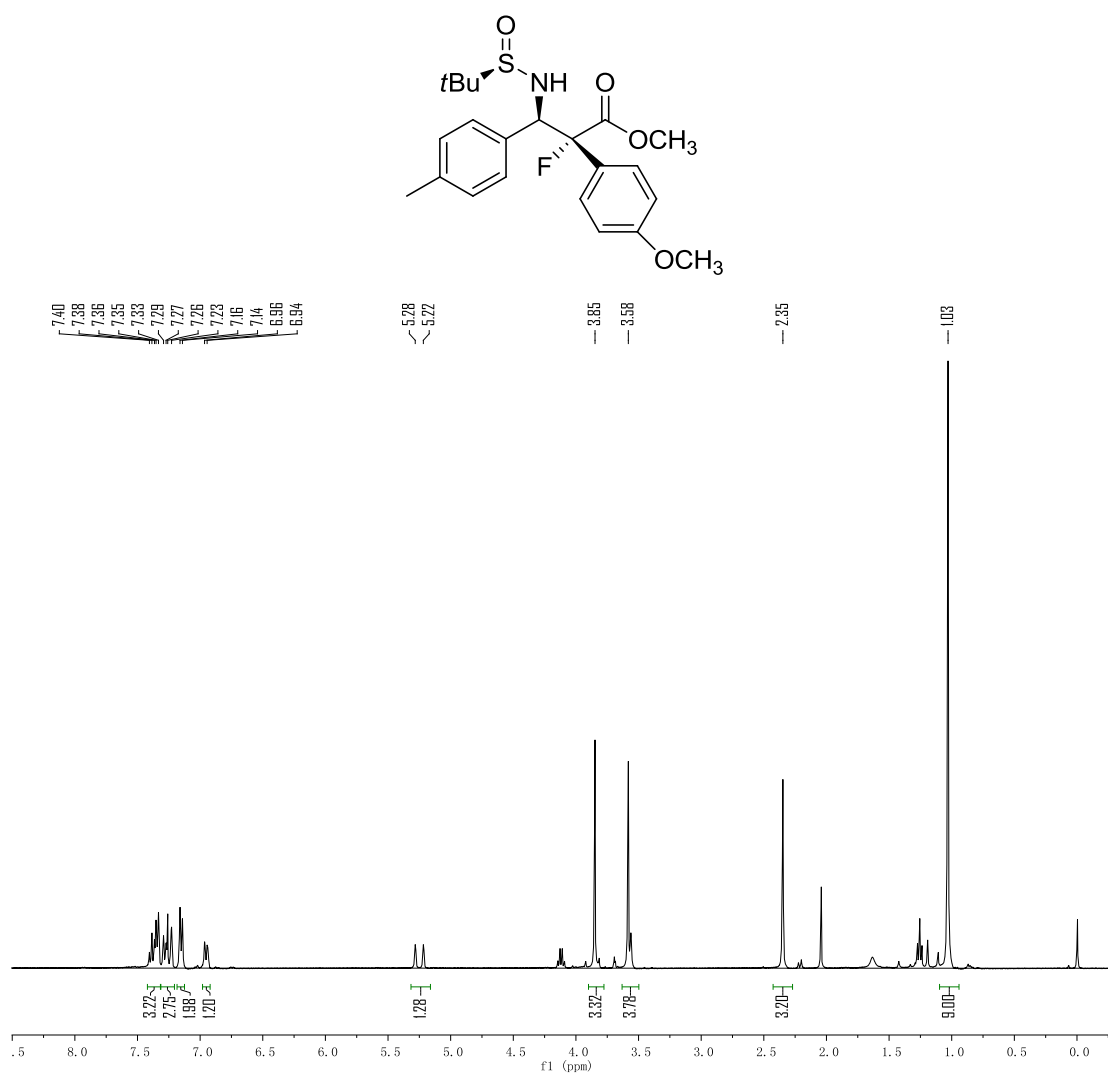

$^{19}\text{F}$  NMR (376 MHz,  $\text{CDCl}_3$ ) spectrum of **5g**

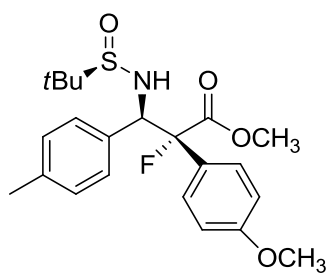

$\delta$  -177.62  
 $\delta$  -177.68

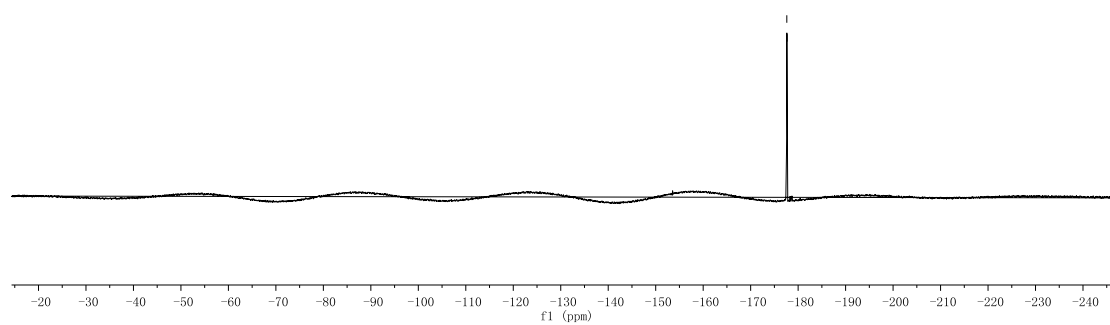

$^{13}\text{C}$  NMR (101 MHz,  $\text{CDCl}_3$ ) spectrum of **5g**

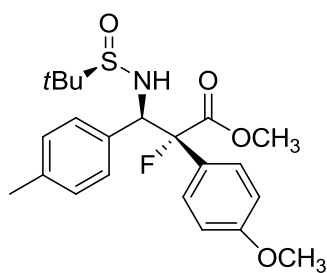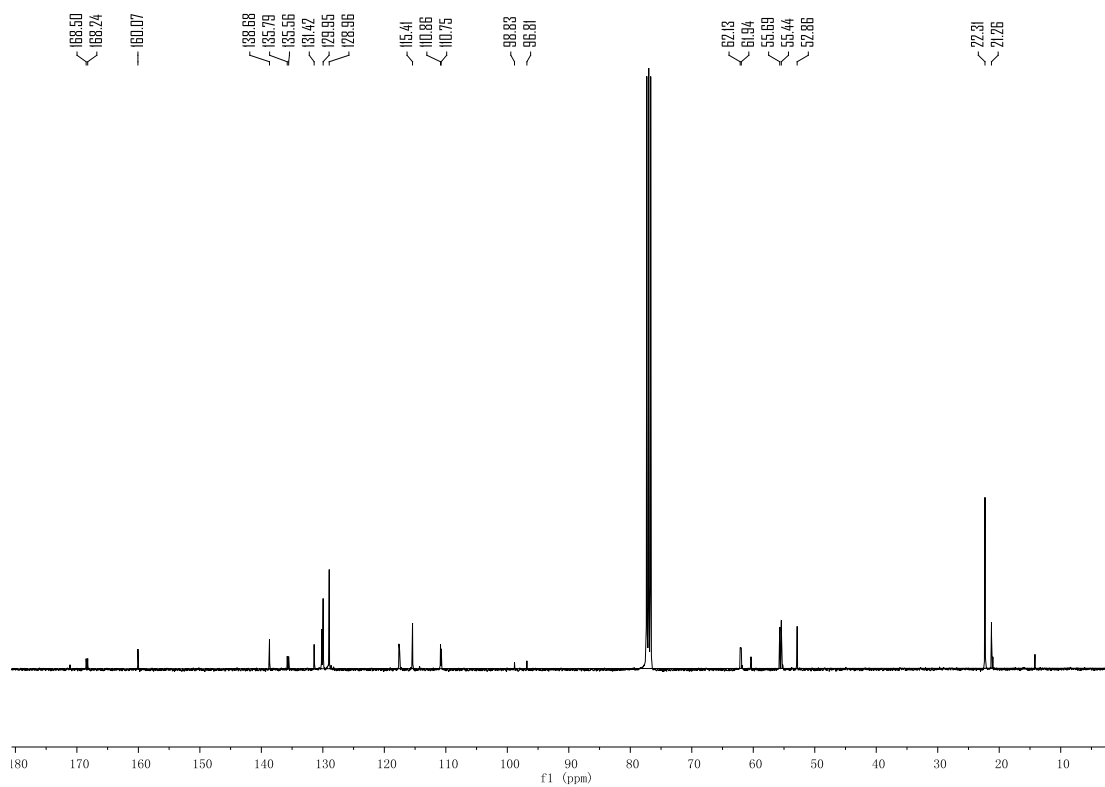

$^1\text{H}$  NMR (400 MHz,  $\text{CDCl}_3$ ) spectrum of **5h**

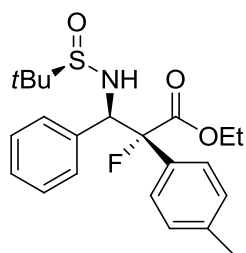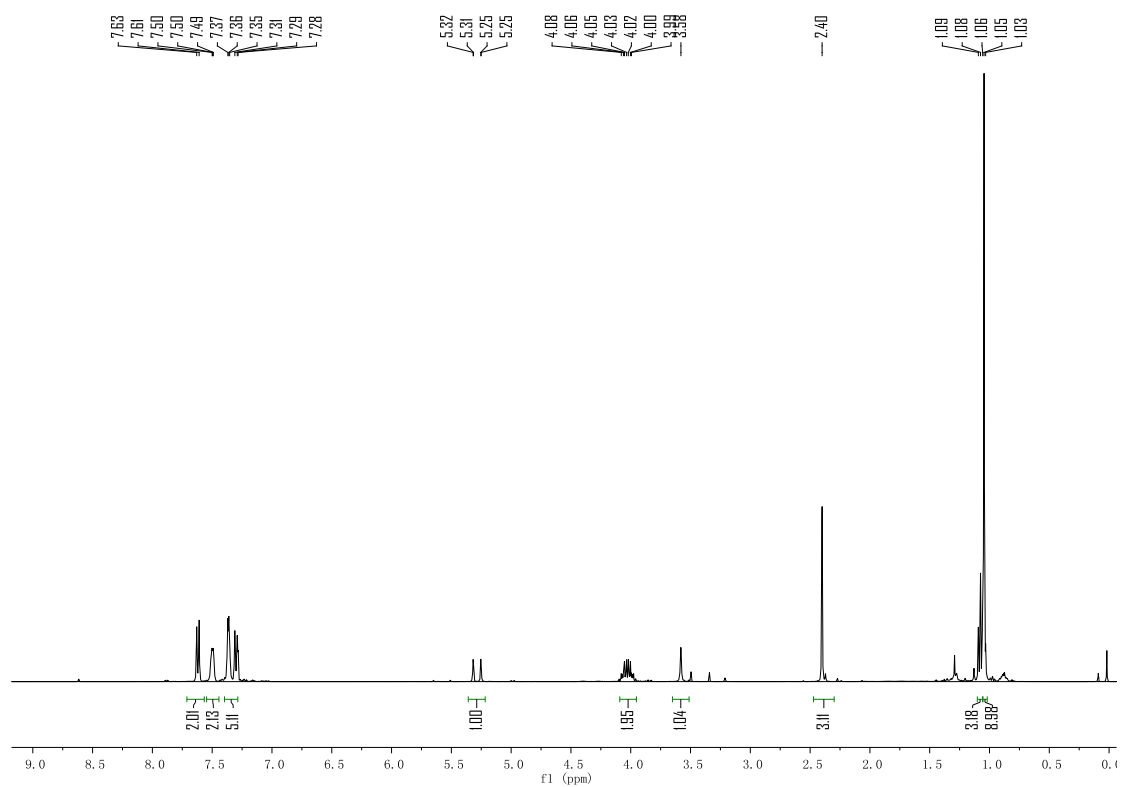

$^{19}\text{F}$  NMR (376 MHz,  $\text{CDCl}_3$ ) spectrum of **5h**

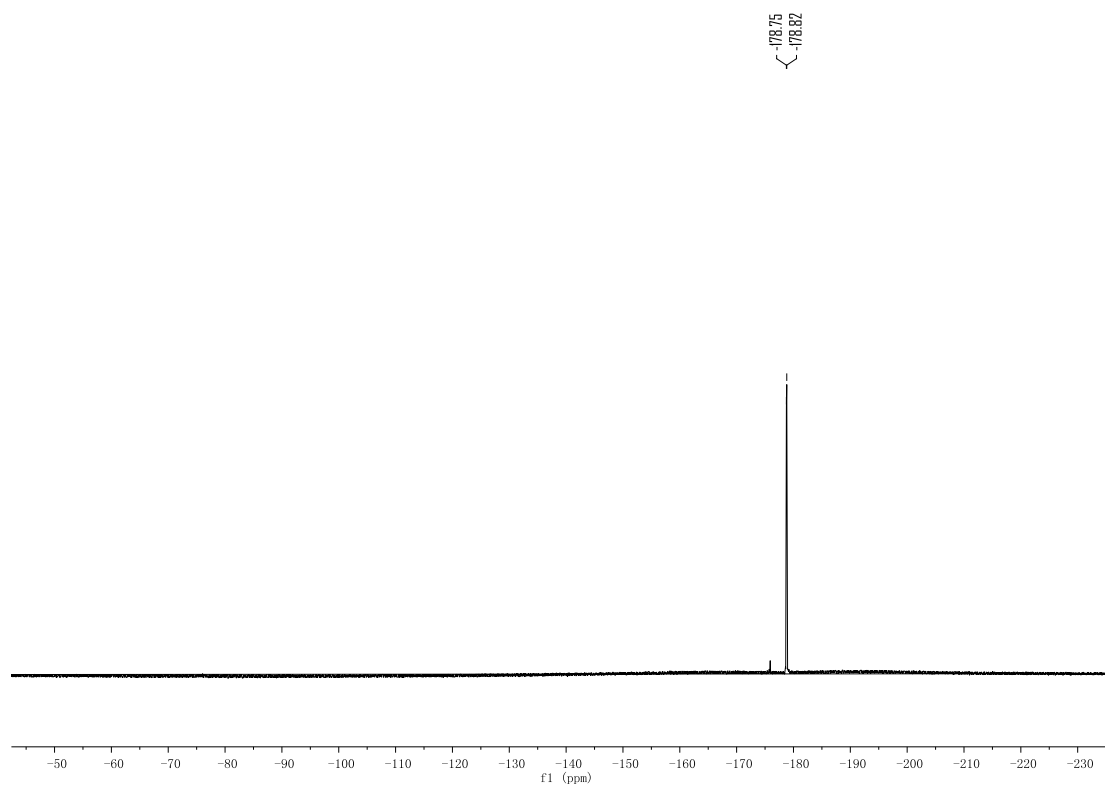

$^{13}\text{C}$  NMR (101 MHz,  $\text{CDCl}_3$ ) spectrum of **5h**

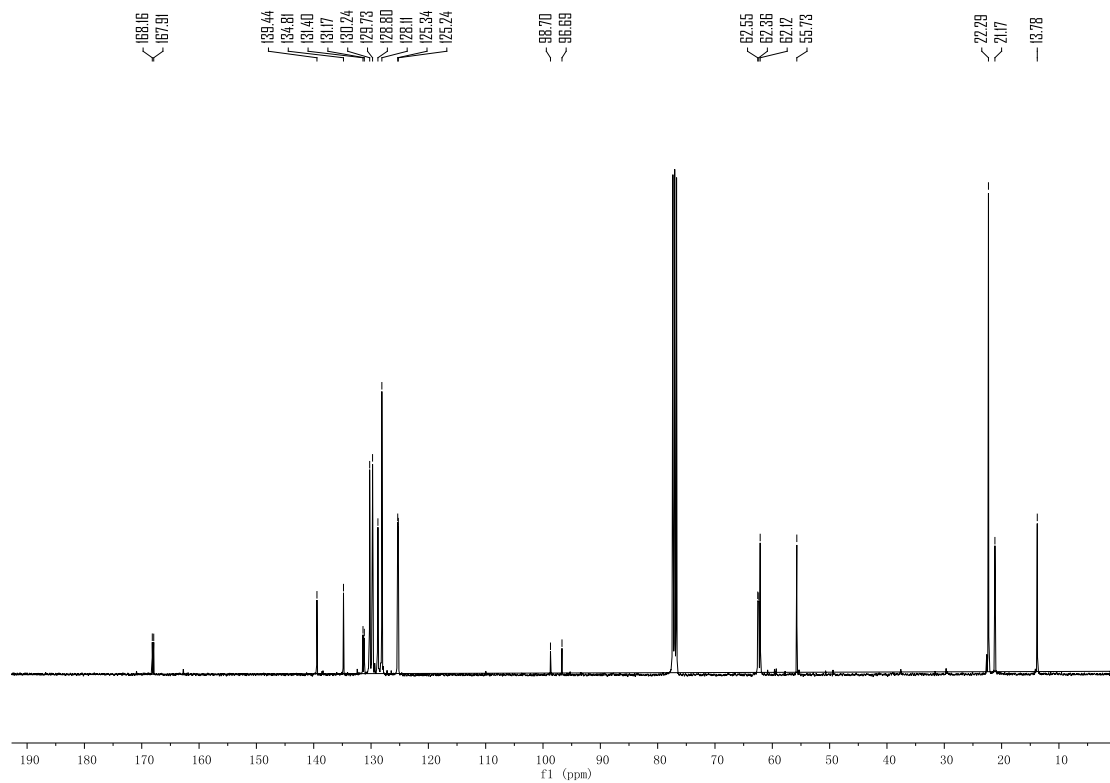



$^1\text{H}$  NMR (400 MHz,  $\text{CDCl}_3$ ) spectrum of **5i**

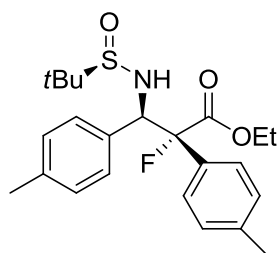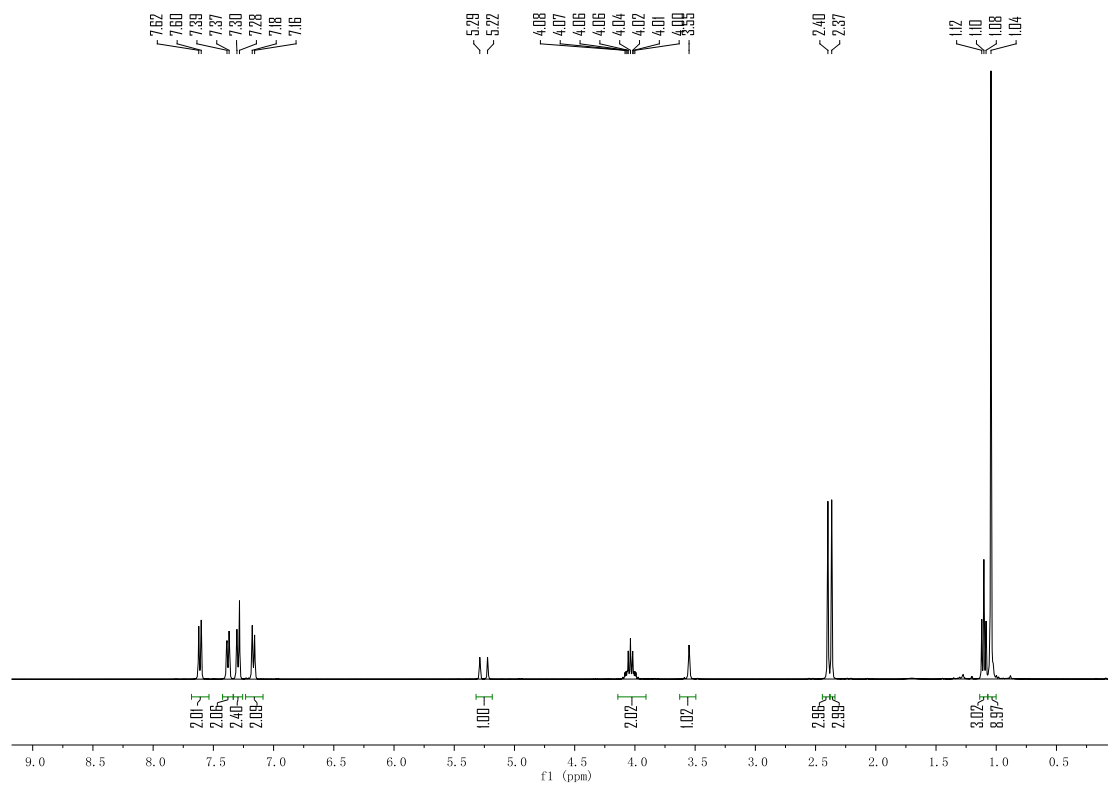

$^{19}\text{F}$  NMR (376 MHz,  $\text{CDCl}_3$ ) spectrum of **5i**

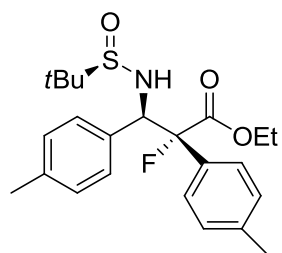

178.68  
178.75

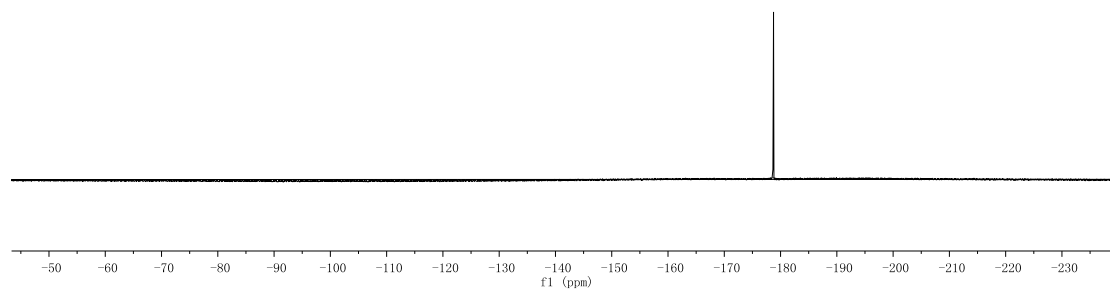

$^{13}\text{C}$  NMR (101 MHz,  $\text{CDCl}_3$ ) spectrum of **5i**

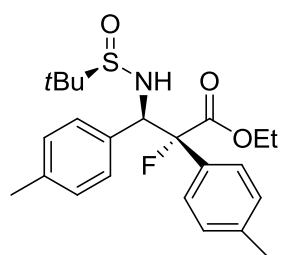

168.17  
167.91  
139.36  
138.56  
131.64  
131.50  
131.27  
130.08  
129.71  
129.45  
128.86  
128.35  
125.25  
98.74  
96.74  
62.06  
55.67  
22.32  
21.24  
21.16  
13.80

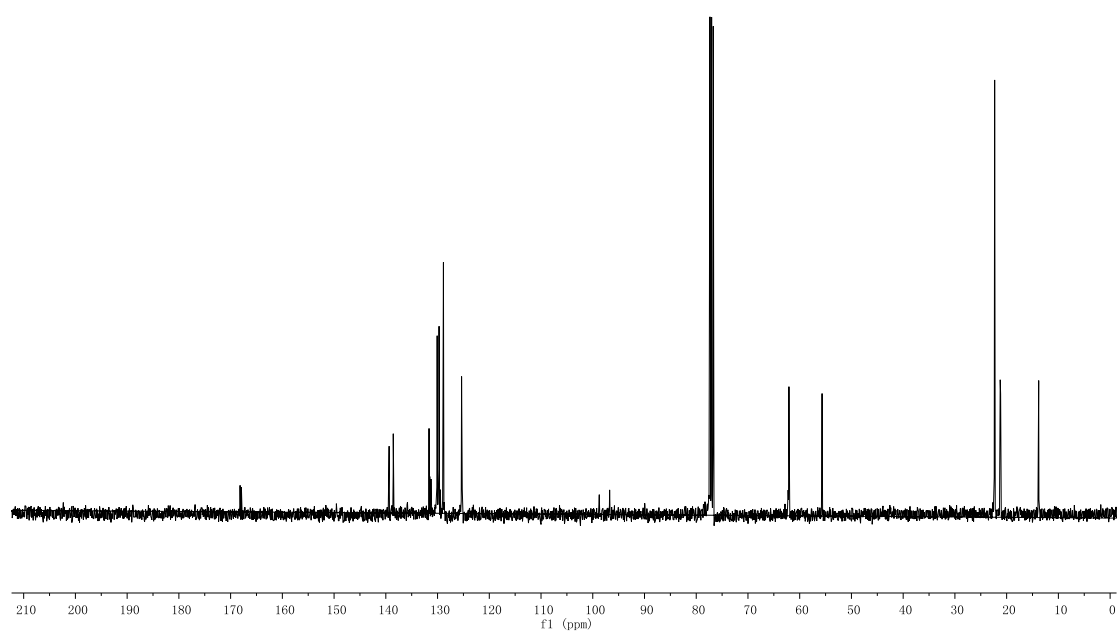

$^1\text{H}$  NMR (400 MHz,  $\text{CDCl}_3$ ) spectrum of **5j**

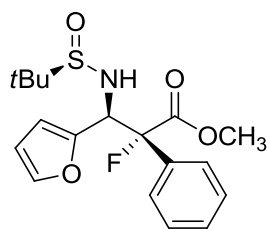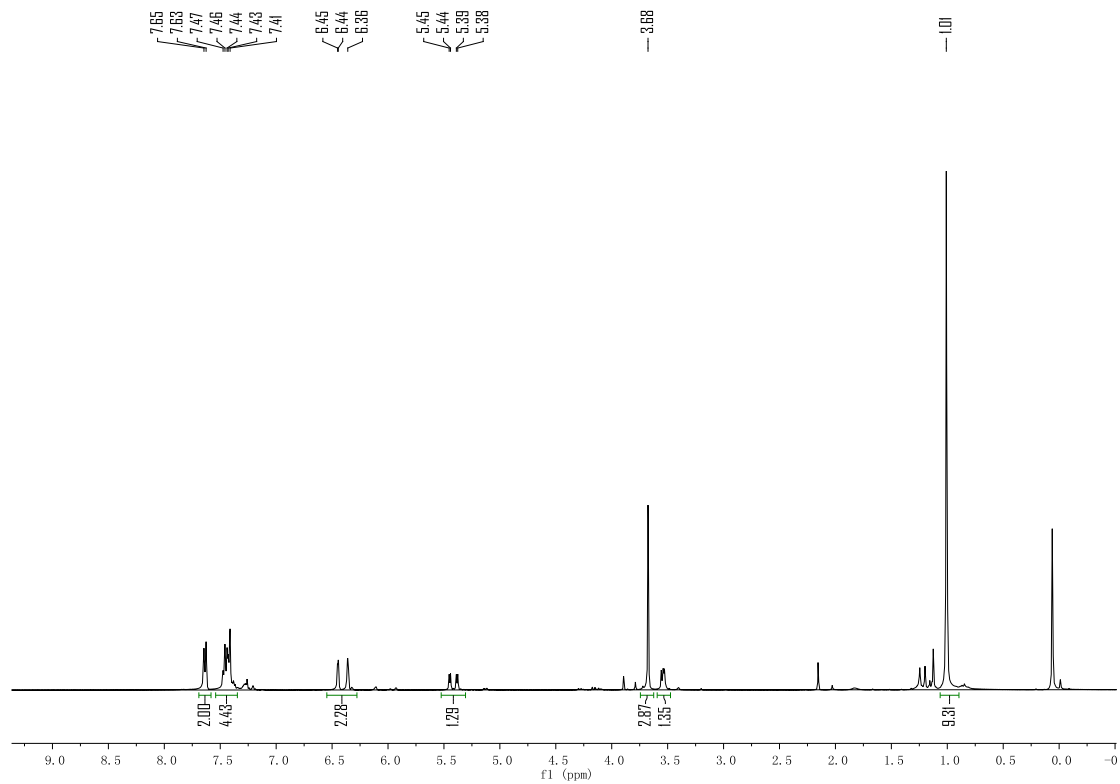

$^{19}\text{F}$  NMR (376 MHz,  $\text{CDCl}_3$ ) spectrum of **5j**

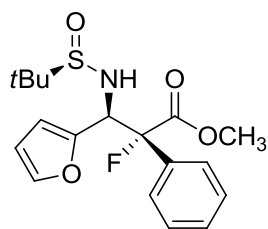

$\delta$  -177.20  
 $\delta$  -177.27

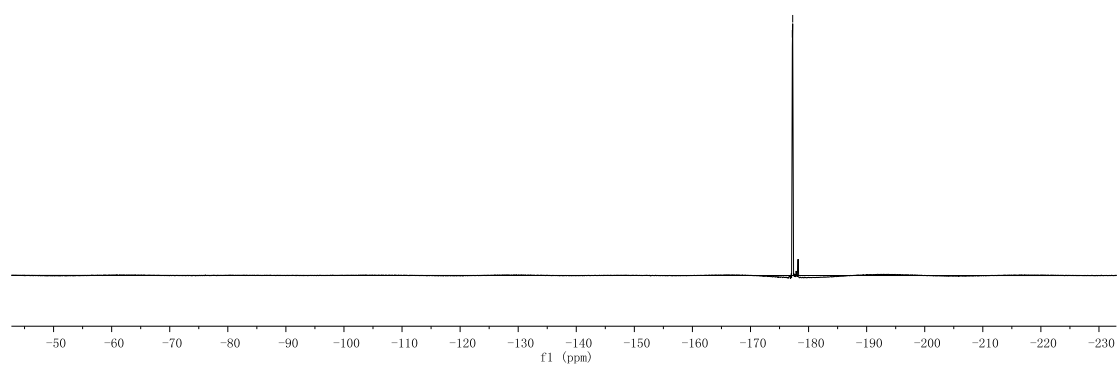

<sup>13</sup>C NMR (101 MHz, CDCl<sub>3</sub>) spectrum of **5j**

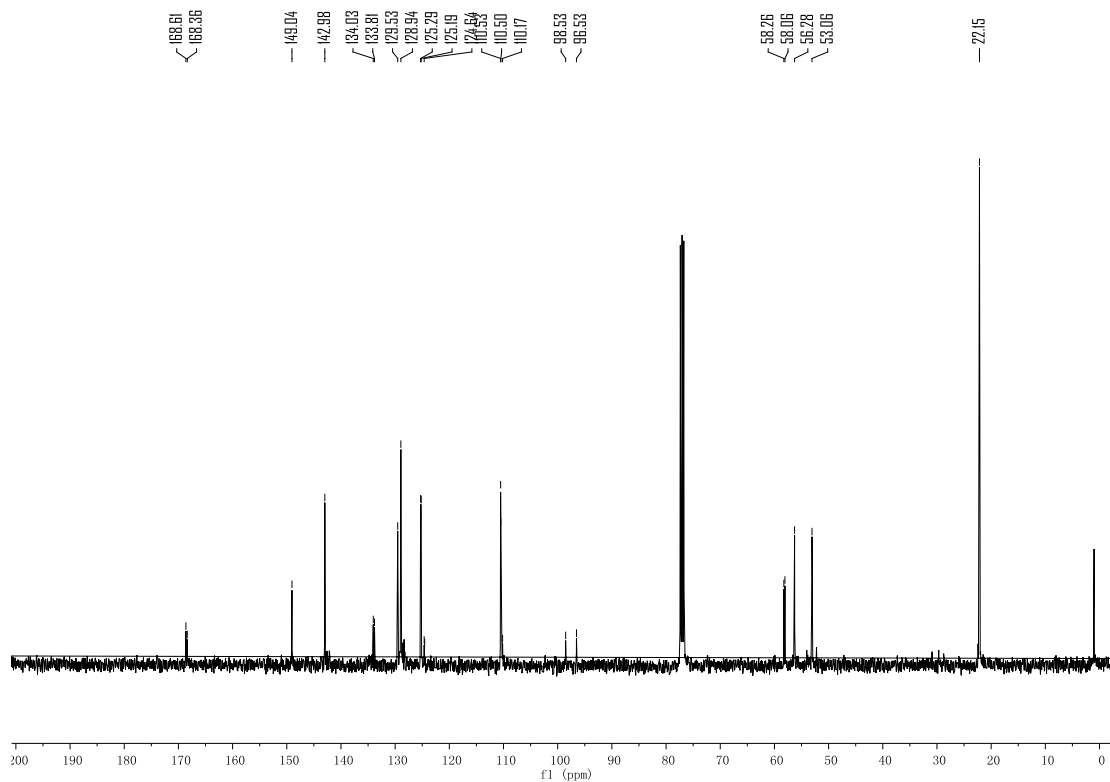

$^1\text{H}$  NMR (400 MHz,  $\text{CDCl}_3$ ) spectrum of **5k**

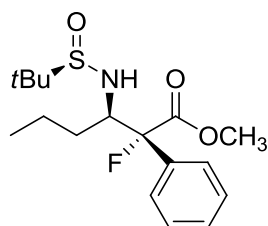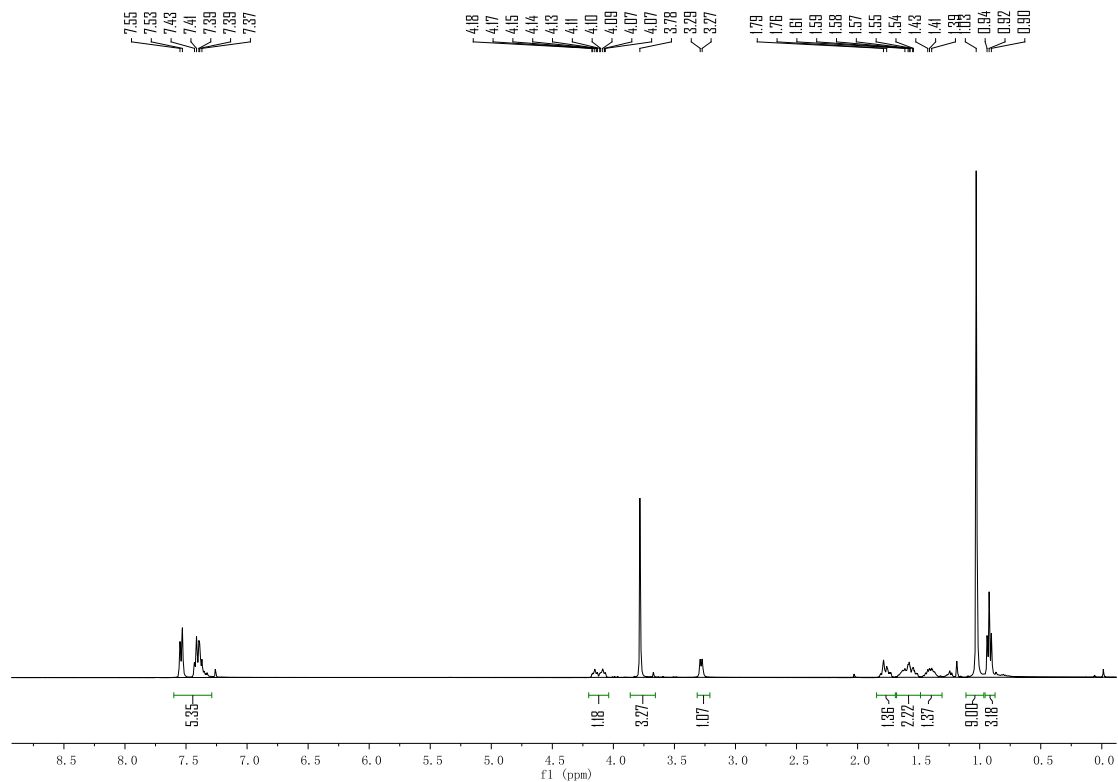

$^{19}\text{F}$  NMR (376 MHz,  $\text{CDCl}_3$ ) spectrum of **5k**

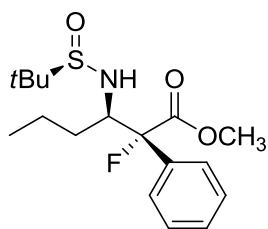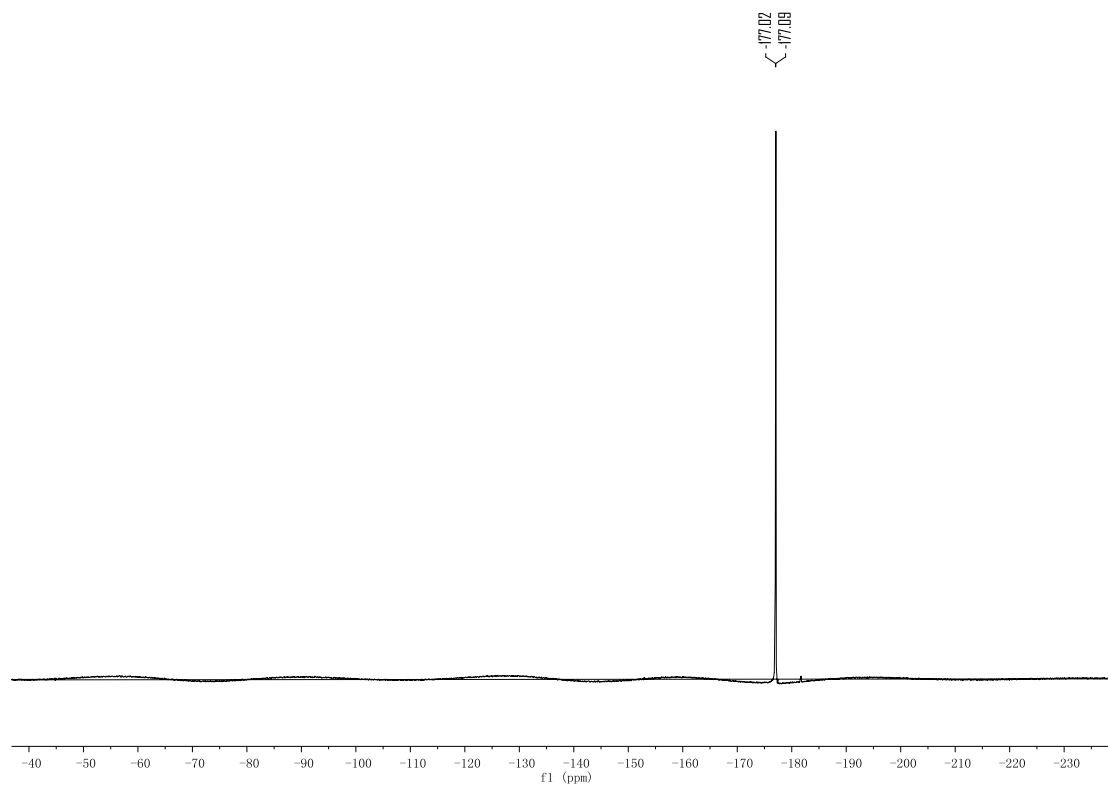



$^{13}\text{C}$  NMR (101 MHz,  $\text{CDCl}_3$ ) spectrum of **5k**

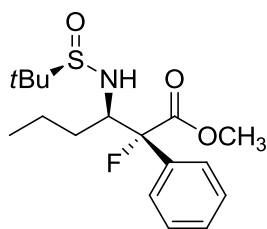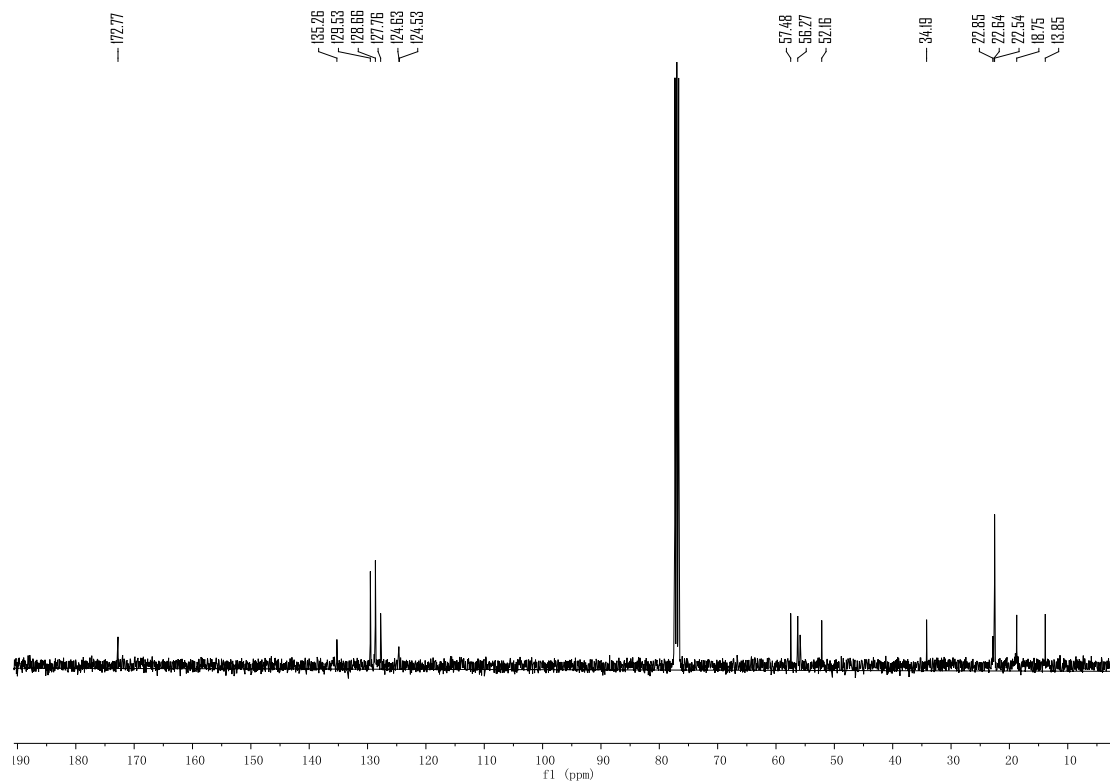

$^1\text{H}$  NMR (400 MHz,  $\text{CDCl}_3$ ) spectrum of **7a**

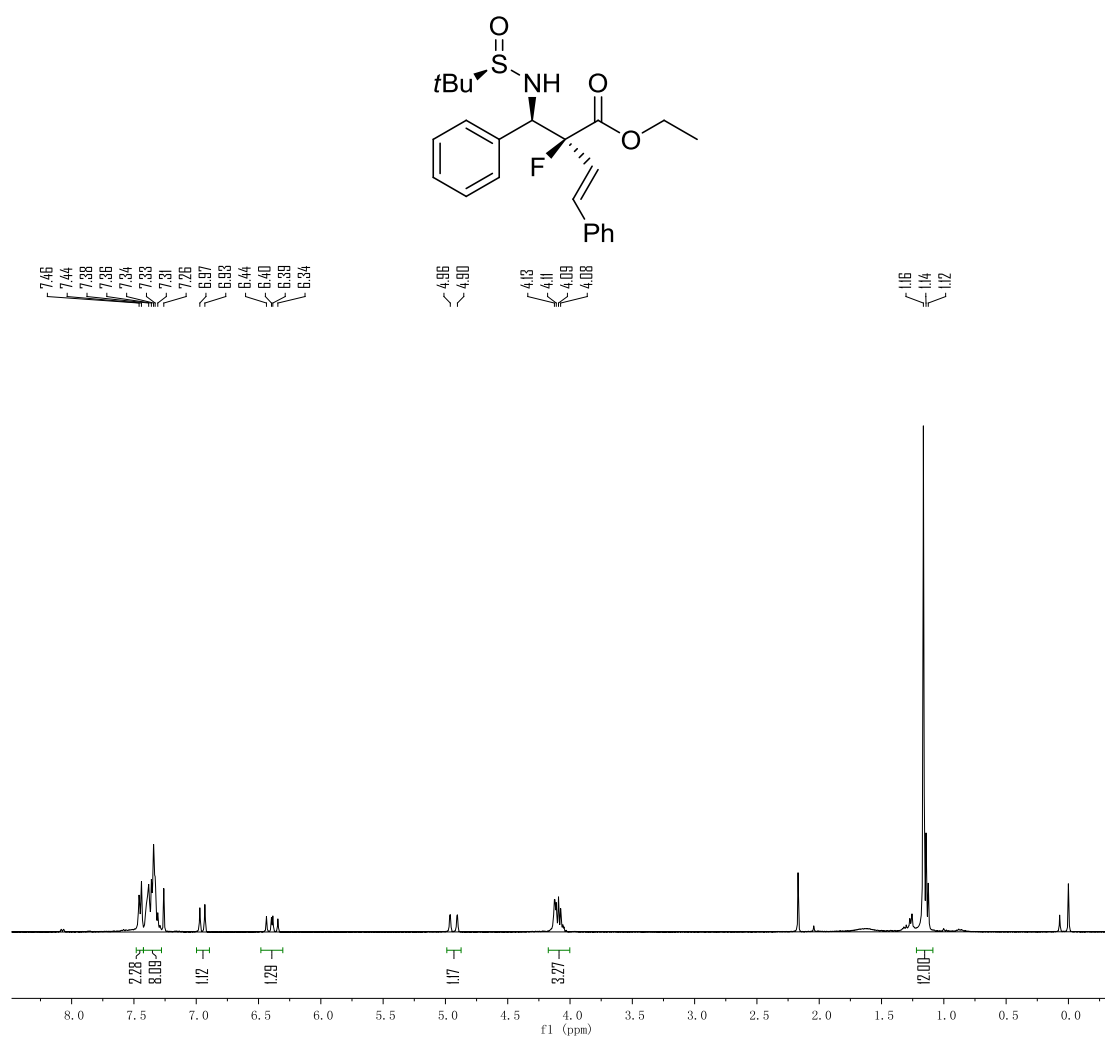

$^{19}\text{F}$  NMR (376 MHz,  $\text{CDCl}_3$ ) spectrum of **7a**

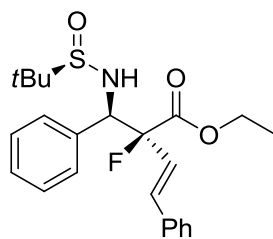

-177.80  
-177.85  
-177.91

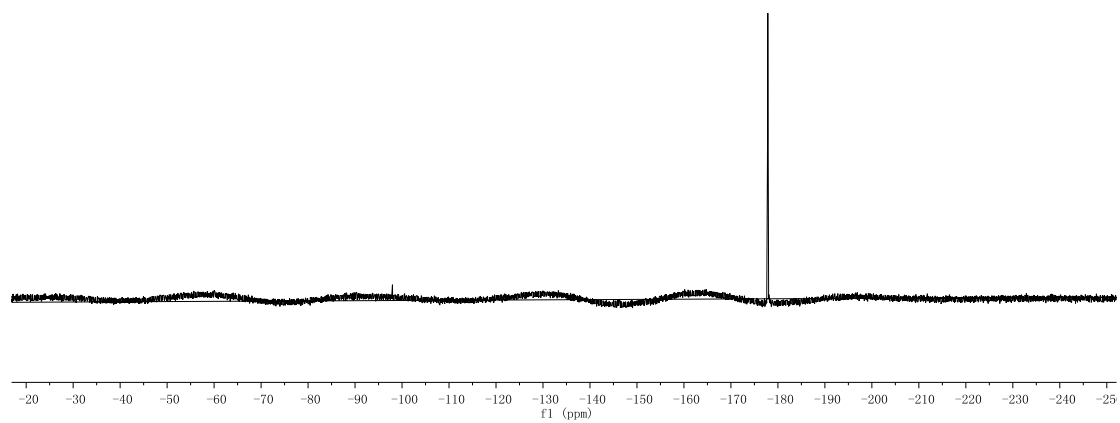

$^{13}\text{C}$  NMR (101 MHz,  $\text{CDCl}_3$ ) spectrum of **7a**

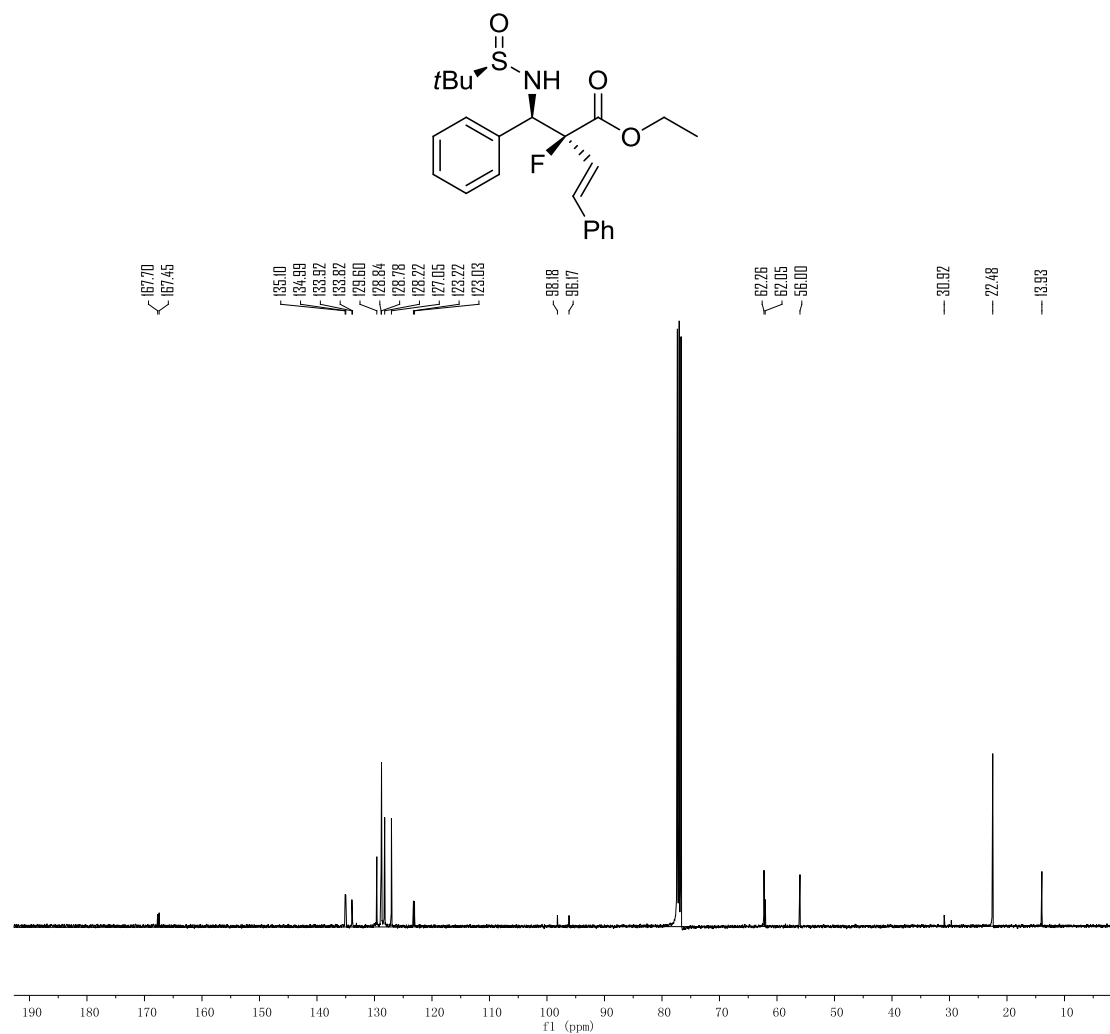

$^1\text{H}$  NMR (400 MHz,  $\text{CDCl}_3$ ) spectrum of **7b**

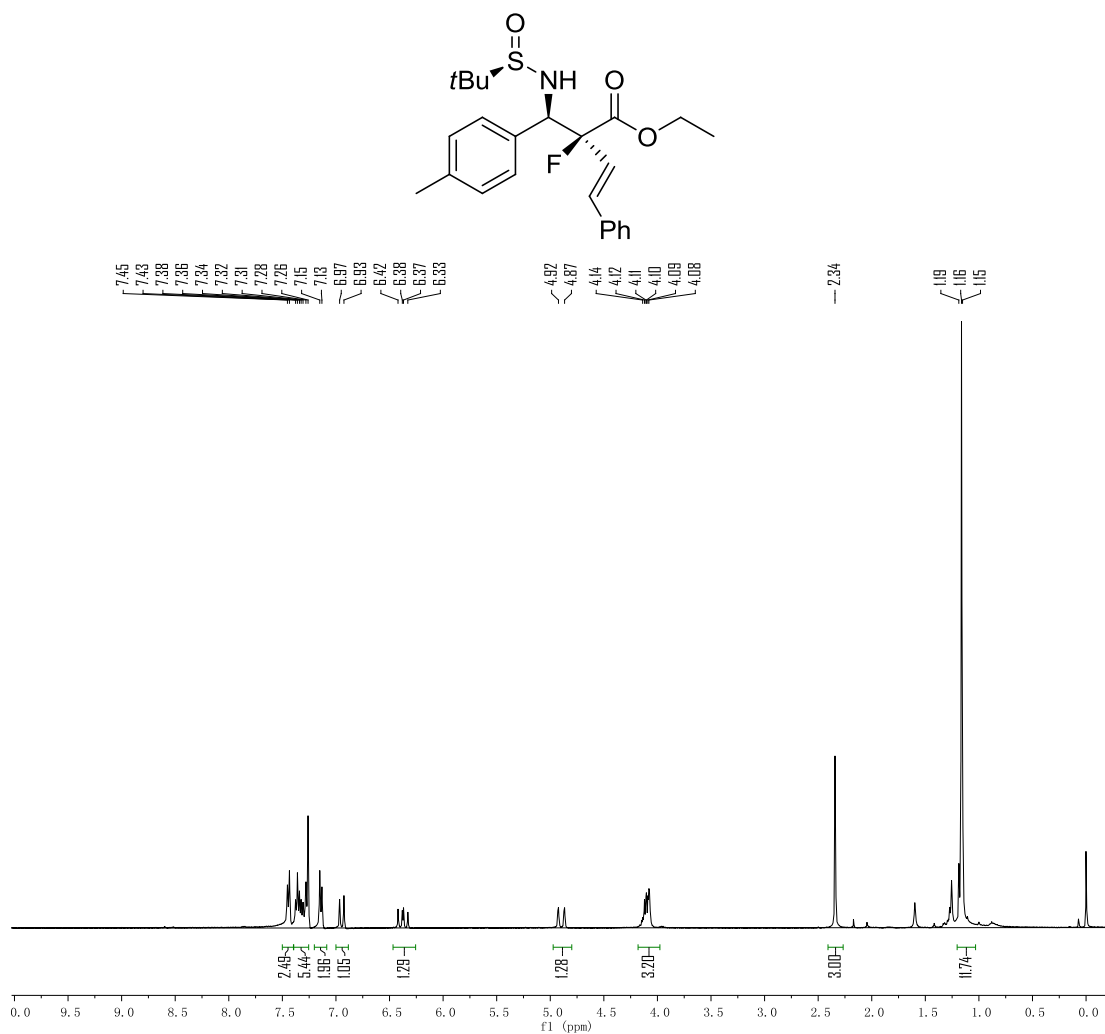

$^{19}\text{F}$  NMR (376 MHz,  $\text{CDCl}_3$ ) spectrum of **7b**

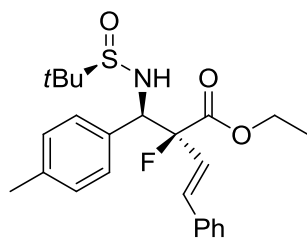

-177.72  
-177.78  
-177.84

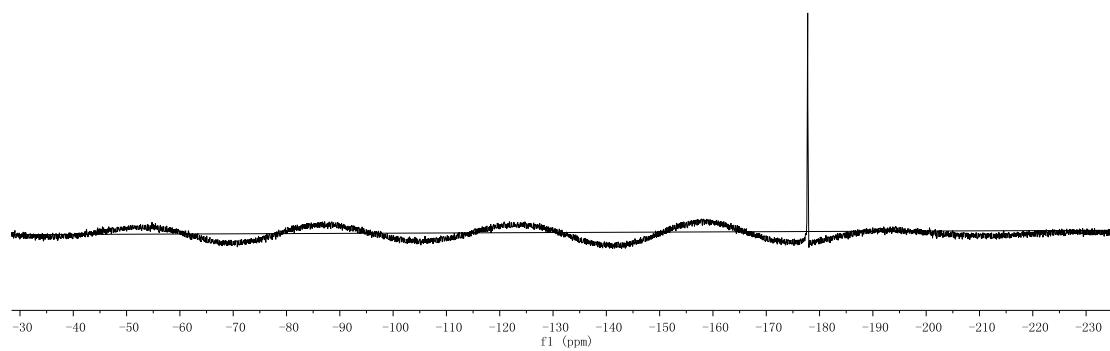

<sup>13</sup>C NMR (101 MHz, CDCl<sub>3</sub>) spectrum of **7b**

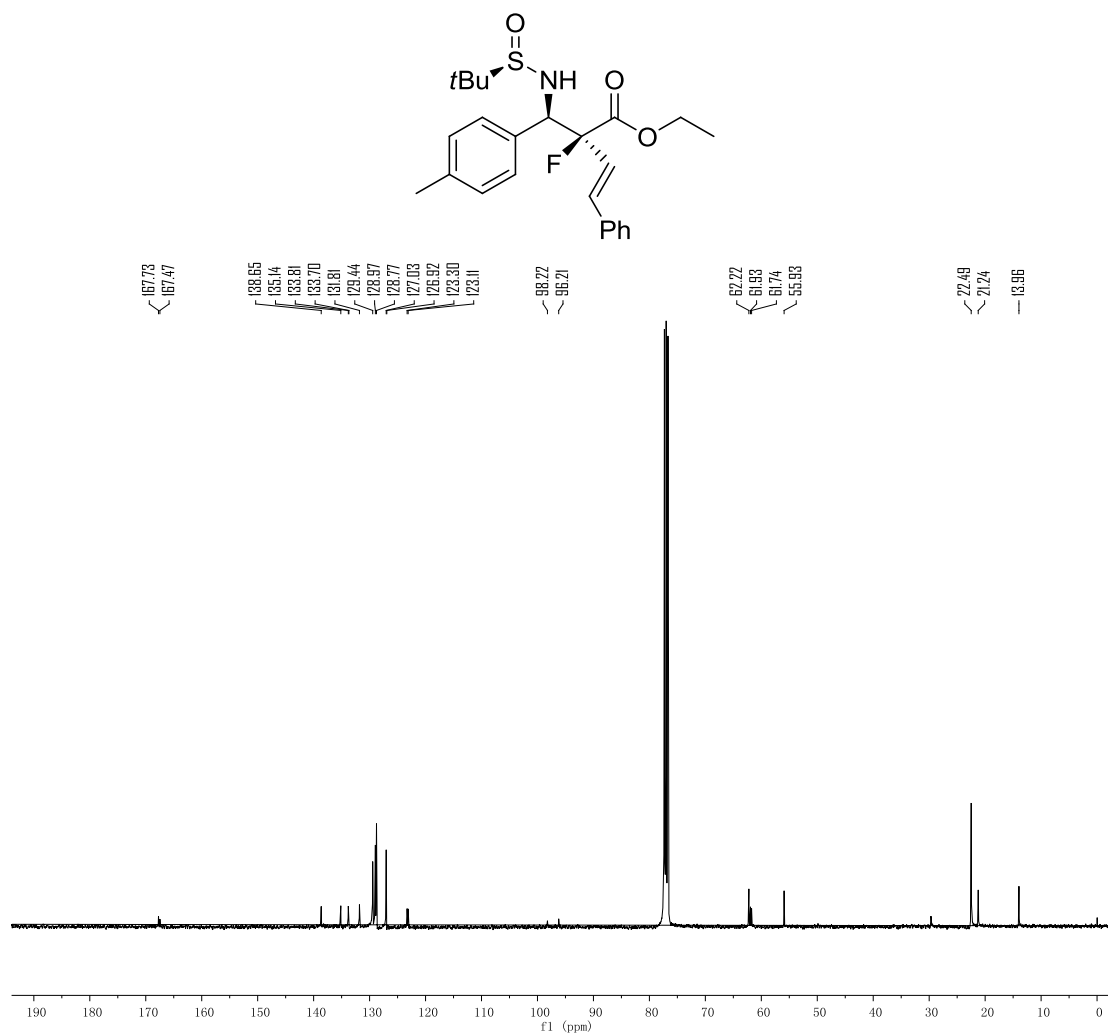

Supplement: c6ob01084a1.pdf [file c6ob01084a1.pdf]
